# Supplementary material
Source: publisher figshare collection journal article supplement (https://acs.figshare.com/ndownloader/files/12326519)
Supplement: Supplementary file 1 [file 12326519]

## Supporting Information

### Molecular Dynamics Simulations of Mismatched DNA Duplexes Associated with the Major C<sup>8</sup>-Linked 2'-Deoxyguanosine Adduct of the Food Mutagen Ochratoxin A: Influence Of Opposing Base, Adduct Ionization State, and Sequence on the Structure of Damaged DNA

Preetleen Kathuria,<sup>1</sup> Purshotam Sharma,<sup>1</sup> Richard A. Manderville<sup>2</sup> and Stacey D. Wetmore<sup>3\*</sup>

<sup>1</sup>*Computational Biochemistry Laboratory, Department of Chemistry and Centre for Advanced Studies in Chemistry, Panjab University, Chandigarh, India 160014.* <sup>2</sup>*Departments of Chemistry and Toxicology, University of Guelph, Guelph, Ontario, Canada N1G 2W1.*

<sup>3</sup>*Department of Chemistry and Biochemistry, University of Lethbridge, Lethbridge, Alberta, Canada T1K 3M4.*

\*E-mail: stacey.wetmore@uleth.ca. Telephone: (403) 329-2323. Fax: (403) 329-2057

#### Table of Contents

|                                                                                                                                                                                                                                                    |     |
|----------------------------------------------------------------------------------------------------------------------------------------------------------------------------------------------------------------------------------------------------|-----|
| <b>Section S1.</b> Additional details of the computational protocol.....                                                                                                                                                                           | S2  |
| <b>Figure S1.</b> Structures of N-linked, C-linked and O-linked C <sup>8</sup> -G nucleoside adducts previously studied in mismatched DNA duplexes.....                                                                                            | S5  |
| <b>Figures S2–S4.</b> Representative lesion-site structures of the B conformers of DNA containing OT-G in different ionization states paired opposite A, G or T.....                                                                               | S6  |
| <b>Figures S5–S7.</b> Lesion-site hydrogen bonding for OT-G in different ionization states and sequence contexts mispaired against A, T or G in the B adducted DNA conformation.....                                                               | S9  |
| <b>Figures S8–S10.</b> Hydrogen-bonding energies between OT-G in different ionization states and the opposing base in the B and W adducted DNA conformations for three sequence contexts.....                                                      | S12 |
| <b>Figures S11–S13.</b> van der Waals stacking energies between OT-G in different ionization states and the flanking bases in each adducted DNA conformation for three sequence contexts.....                                                      | S15 |
| <b>Figures S14–S16.</b> Representative lesion-site structures of the W conformers of DNA containing OT-G in different ionization states paired opposite A, G or T.....                                                                             | S18 |
| <b>Figures S17–S19.</b> Lesion-site hydrogen bonding for OT-G in different ionization states and sequence contexts position mispaired against A, T or G in the W adducted DNA conformation.....                                                    | S21 |
| <b>Figures S20–S22.</b> Representative lesion-site structures of the S conformers of DNA containing OT-G in different ionization states paired opposite A, G or T.....                                                                             | S24 |
| <b>Figure S23–S25.</b> Backbone rmsd versus time for OT-G in all MD simulations considered in the present work.....                                                                                                                                | S27 |
| <b>Figure S26.</b> Overlay of the representative lesion-site structures obtained from last 10 ns MD simulations carried out using different non-bonded cut-offs .....                                                                              | S31 |
| <b>Figure S27.</b> Overlay of the representative lesion-site structures obtained from 40 ns and 500 ns MD simulations.....                                                                                                                         | S30 |
| <b>Tables S1–S3.</b> Average values and standard deviations for $\chi$ and $\theta$ , and backbone rmsd for the different conformations of DNA containing OT-G in different ionization states and sequence contexts paired against A, T and G..... | S32 |

|                                                                                                                                                                                                                   |     |
|-------------------------------------------------------------------------------------------------------------------------------------------------------------------------------------------------------------------|-----|
| <b>Tables S4–S6.</b> Occupancies of the hydrogen bonds in the trimers composed of the OT-G mismatch, and the 3'– and 5'–flanking base pairs for the major groove and wedge conformations of damaged DNA.....      | S33 |
| <b>Table S7.</b> Hydrogen-bonding energies for different conformations of adducted DNA containing OT-G paired against C, A, T and G.....                                                                          | S41 |
| <b>Table S8.</b> van der Waals stacking energies for different conformations of adducted DNA containing OT-G paired against C, A, T and G.....                                                                    | S42 |
| <b>Tables S9–S11.</b> Average values and standard deviations for pseudostep parameters and minor groove dimension for DNA containing OT-G paired against A, T and G.....                                          | S43 |
| <b>Tables S12–S14.</b> Occupancies of the Watson-Crick hydrogen bonds of the 3'– and 5'– base pairs flanking the lesion in the stacked conformation of damaged DNA containing OT-G paired against A, T and G..... | S49 |
| <b>Table S15.</b> Relative MM-PBSA free energies for different conformations of DNA containing OT-G paired against A, T or G.....                                                                                 | S52 |
| <b>Tables S16–S18.</b> Hydrogen-bond occupancies for the base pairs at the terminal ends of DNA containing OT-G paired against A, T and G.....                                                                    | S53 |
| <b>Tables S19–S22.</b> Partial charges and atom types of the OT-G adduct in different ionization states.....                                                                                                      | S62 |
| <b>Tables S23–S24.</b> Structural parameters for select simulations performed using a 10 Å box-length and 9 Å non-bonded cut-off.....                                                                             | S70 |
| <b>Tables S25–S26.</b> Structural parameters for select 500 ns simulations.....                                                                                                                                   | S70 |

## Section S1. Additional details of the computational protocol.

*Starting Structures:* A 12-mer DNA oligonucleotide (5'–CTCG<sup>1</sup>G<sup>2</sup>CG<sup>3</sup>CCATC) containing the mutagenic *NarI* recognition sequence (underlined)<sup>1</sup> was used for MD simulations. Specifically, the OT-G adduct in each of four ionization states (i.e., the physiologically relevant COO<sup>−</sup>, ArO<sup>−</sup> and dianionic states, as well as the neutral (control) state) was reiteratively placed at the G<sup>1</sup>, G<sup>2</sup> or G<sup>3</sup> position, and paired opposite A, T or G. Initial conformations were considered in accordance with the three conformational themes (i.e., B, W and S, Figure 1B–D) previously reported for the C<sup>8</sup>-bonded aromatic amine adducts,<sup>2</sup> as well as the OT-G adduct paired opposite C.<sup>3, 4</sup> These conformers were studied for all combinations of four OT-G ionization states, three sequence contexts and three mismatched bases, leading to a total of (3\*4\*3\*3) 108 distinct conformers. Trial simulations were carried out with different starting structures, in attempts to ensure final production simulations correspond to each of the three conformational themes and hydrogen bonding at the terminal ends remain intact (Tables S16–S18), thereby allowing meaningful comparison of the free energies. Simulations for which the correct conformation was not obtained or terminal base pairs did not remain intact were discarded and new starting structures were used to re-simulate the associated conformation. New starting structures were obtained either by fine-tuning the initial structure, the representative structure from a previous simulation or the representative structure corresponding to the same conformation with a different adduct ionization state. However, the S conformer of G mismatched DNA

containing  $\text{ArO}^-$  OT-G at  $G^2$  and dianionic OT-G at  $G^3$  could not be isolated, with the structure reverting to the W conformer. Additionally, since our previous study (ref. 19 of manuscript) did not consider the  $\text{ArO}^-$  ionization state of OT-G, simulations for  $\text{ArO}^-$  OT-G incorporated at  $G^1$ ,  $G^2$  and  $G^3$  paired against C were also conducted for comparison.

*Simulation Details:* Each DNA oligonucleotide was neutralized using 22 sodium ions and solvated in an octahedral box containing TIP3P water<sup>5</sup> using the pmemd module of AMBER 12,<sup>6</sup> such that each DNA atom at least 8 Å away from the edge of the box. The natural and modified DNA nucleotides were described using the parmbsc0 modification<sup>7</sup> of parm99,<sup>8</sup> and additional parameters and partial charges for the OT-G nucleotide were taken from our previous studies (Tables S19–S22).<sup>3, 4</sup> While applying a  $500 \text{ kcal mol}^{-1} \text{Å}^{-2}$  restraint on DNA, the ions and water molecules within the box were initially minimized using 500 steps of steepest decent (SD), and 500 steps of conjugate gradient (CG), minimization. Subsequently, the restraint on DNA was removed and the whole system was minimized using 1000 steps of SD, and 1500 steps of CG, minimization. The temperature of the system was then increased from 0 to 300 K by employing a Langevin temperature equilibration scheme, and the system was simulated for 20 ps at constant volume. A cut-off of 10 Å for the non-bonded interactions was used in our simulations. To analyze the effect of changing the non-bonded cut-off, we repeated a set of simulations with a box length of 10 Å and a non-bonded cut-off of 9 Å. The structural parameters derived from these simulations match those from our original simulations (Figure 26, and Tables S23–S24). Finally, a total of 108 production MD simulations of 40 ns duration were carried out using an NPT ensemble with a Brendsen barostat.

To ensure key DNA structural parameters are converged and obtain the most reliable conclusions, all simulation frames between 30 and 40 ns were used for the detailed structural and free energy analyses. A similar protocol has previously been used in MD studies of natural<sup>9</sup> and damaged<sup>9-11</sup> DNA. For each system, no significant fluctuations were observed in the backbone rmsd over the last 10 ns calculated with respect to the first frame of the production simulation (Figures S23-S25). To further ensure convergence of key structural parameters, a set of simulations were extended for 500 ns, which lead to similar structural and energetic parameters as the original simulations (Figure S27, and Tables S25–S26).

Representative structures for each adducted DNA conformer were obtained by clustering the final 10 ns of the simulation with respect to the  $\chi$  and  $\theta$  dihedral angles (Figure 1A). Additionally, the lesion site van der Waals stacking energies between the OT-G adduct or the partner base (A, G or T) and the 3' or 5'-flanking base pairs were calculated for the B and W adducted DNA conformers. For the S conformer, the opposing base was excluded

from this analysis since it is displaced out of the helix and does not significantly contribute to the stacking energy. The interaction energies between the hydrogen-bonded base pairs were approximated as the electrostatic interaction energy between the nucleobase atoms of the base pairs, whereas the stacking energies were approximated as the van der Waals interaction energy between the nucleobase atoms of the stacked bases. These energies were calculated using the LIE command in AMBERTOOLS. All these analyses were done using cpptraj module of AMBER 12.<sup>6</sup>

*Free energy analysis:* The MM-PBSA<sup>12</sup> free energy (G) for each system was calculated as the sum of the solvation energy ( $E^{\text{sol}}$ ), molecular mechanics energy ( $E^{\text{MM}}$ ) and the entropy term (TS). Thus,

$$G = E^{\text{MM}} + E^{\text{sol}} - TS$$

where T is the temperature and S is the sum of rotational, translational and vibrational entropies for the DNA using the MMPBSA method. The  $E^{\text{MM}}$  term was estimated by summing the internal energy ( $E^{\text{int}}$ ), which contains sum of bonded energy terms such as energy for the bonds ( $E^{\text{bonds}}$ ), bond angles ( $E^{\text{angles}}$ ) and dihedral angles ( $E^{\text{dihedrals}}$ ), and the non-bonded contributions including the van der Waals energy ( $E^{\text{vdW}}$ ) and electrostatic energy ( $E^{\text{elec}}$ ). The solvation term ( $E^{\text{sol}}$ ) was estimated as the sum of polar and non-polar contributions where the polar contribution is estimated using the Poisson-Boltzmann method. In accordance with previous studies on damaged DNA,<sup>4, 13</sup> 1000 frames (i.e., 1 snapshot every 5 ps) were used to calculate the enthalpy and solvation terms, while 100 frames (i.e., 1 snapshot every 50 ps) were used to calculate the entropy term. The energy for each system is calculated and reported relative to the most stable conformer with the similar ionization state, sequence context and the mismatched base. The MM-PBSA (molecular mechanics-Poisson Boltzmann surface area) method was employed to estimate the relative free energies of the adducted DNA conformers.

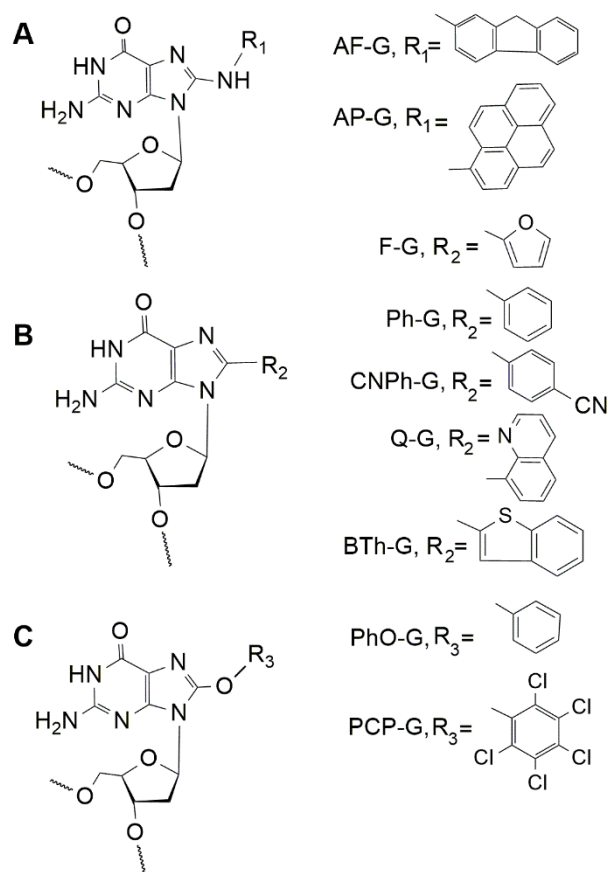

**Figure S1.** Structures of **(A)** N-linked, **(B)** C-linked and **(C)** O-linked C<sup>8</sup>-G nucleoside adducts previously studied in mismatched DNA duplexes.

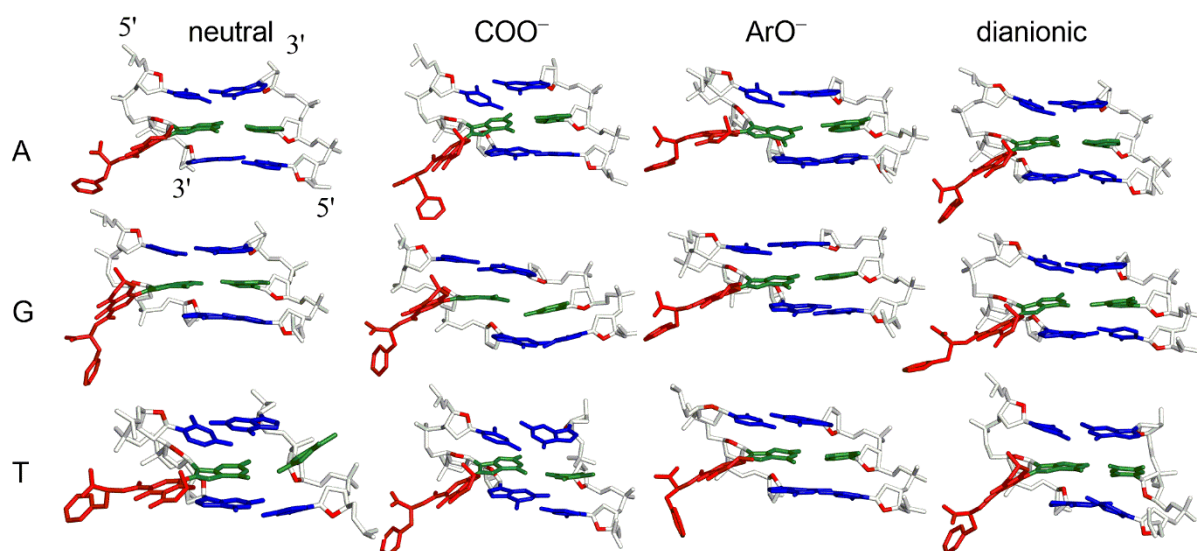

**Figure S2.** Representative lesion-site structures of the major groove (B) conformers of DNA containing OT-G in different ionization states at the G<sup>1</sup> position and paired opposite A, G or T. The OT moiety is shown in red, the damaged G moiety and the opposing base in green, and the base pairs flanking the lesion in blue.

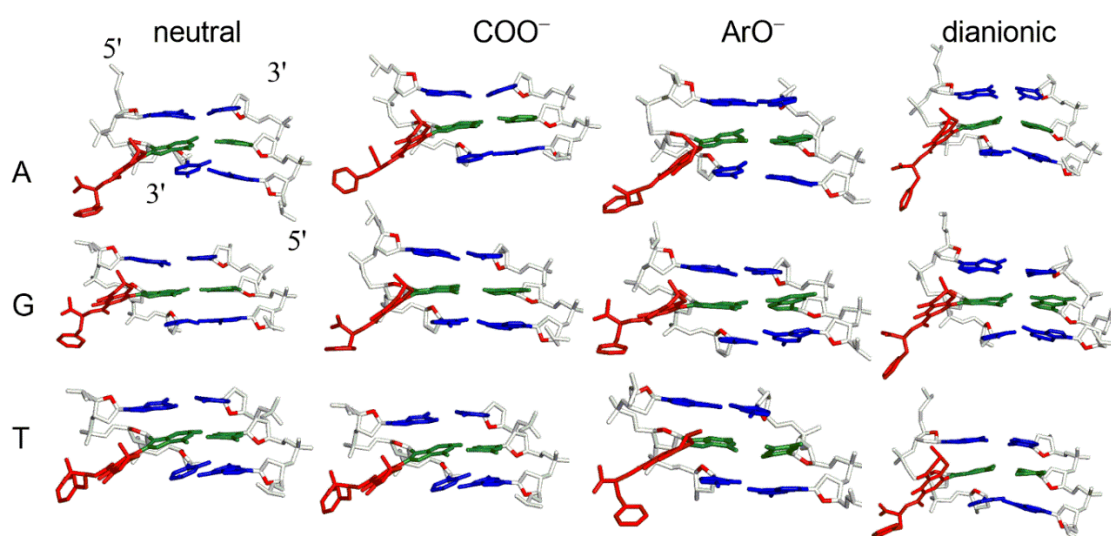

**Figure S3.** Representative lesion-site structures of the major groove (B) conformers of DNA containing OT-G in different ionization states at the G<sup>2</sup> position and paired opposite A, G or T. The OT moiety is shown in red, the damaged G moiety and the opposing base in green, and the base pairs flanking the lesion in blue.

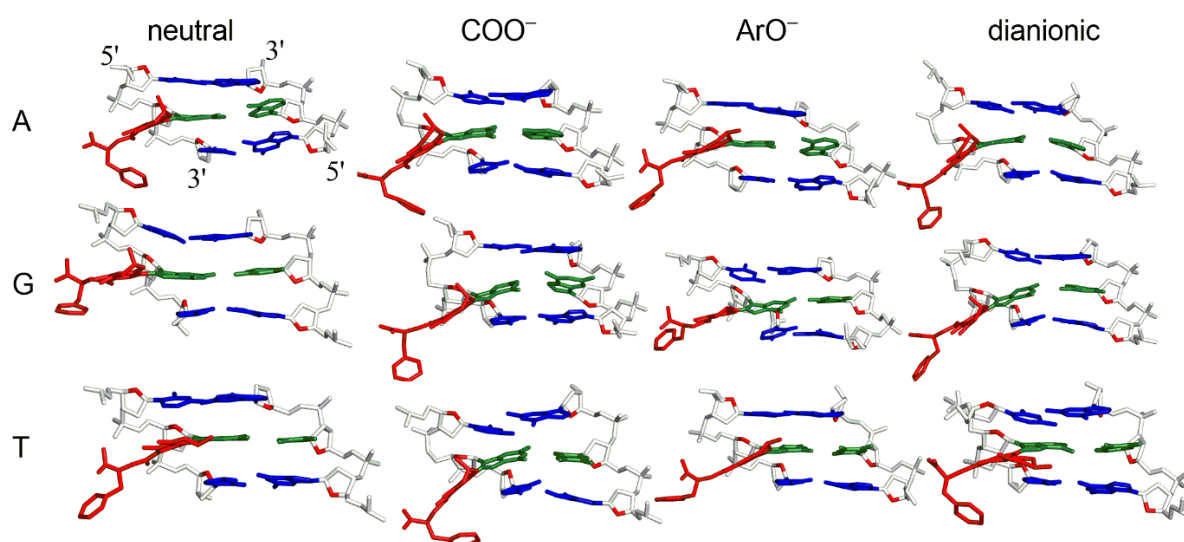

**Figure S4.** Representative lesion-site structures of the major groove (B) conformers of DNA containing OT-G in different ionization states at the G<sup>3</sup> position and paired opposite A, G or T. The OT moiety is shown in red, the damaged G moiety and the opposing base in green, and the base pairs flanking the lesion in blue.



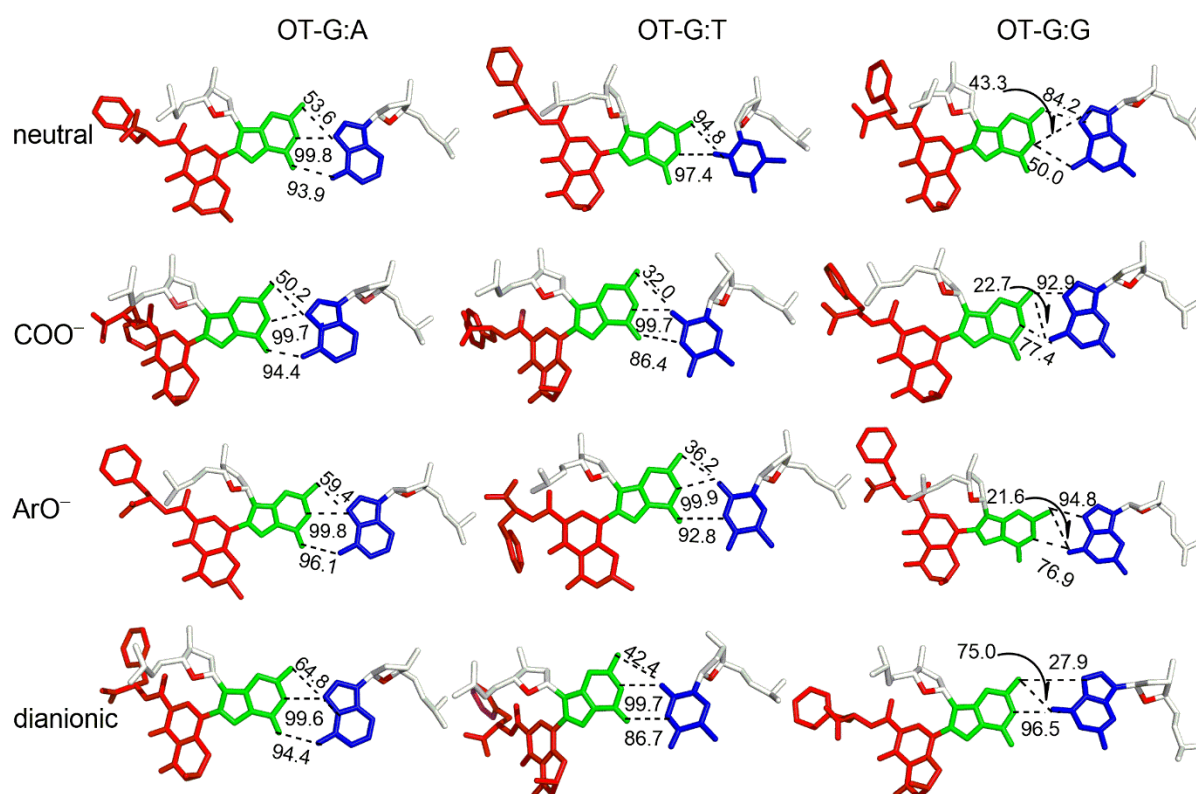

**Figure S5.** Lesion-site hydrogen bonding for OT-G in different ionization states at the G<sup>1</sup> position mispaired against A, T or G in the B adducted DNA conformation.

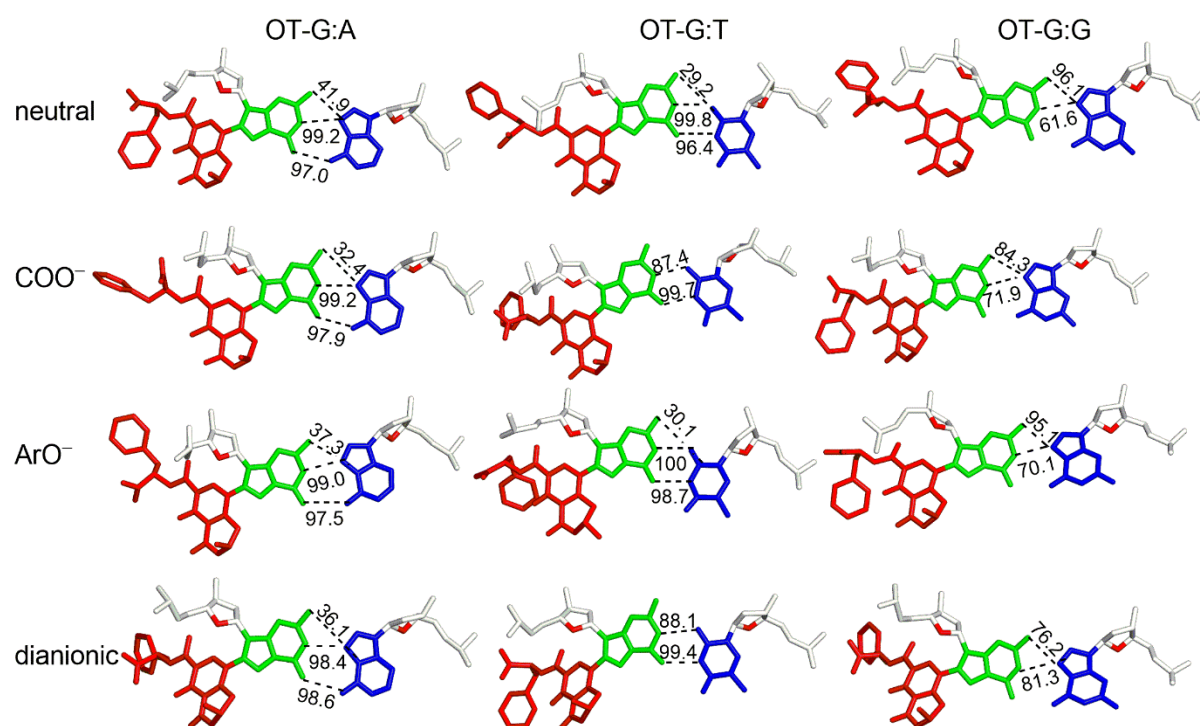

**Figure S6.** Lesion-site hydrogen bonding for OT-G in different ionization states at the G<sup>2</sup> position mispaired against A, T or G in the B adducted DNA conformation.

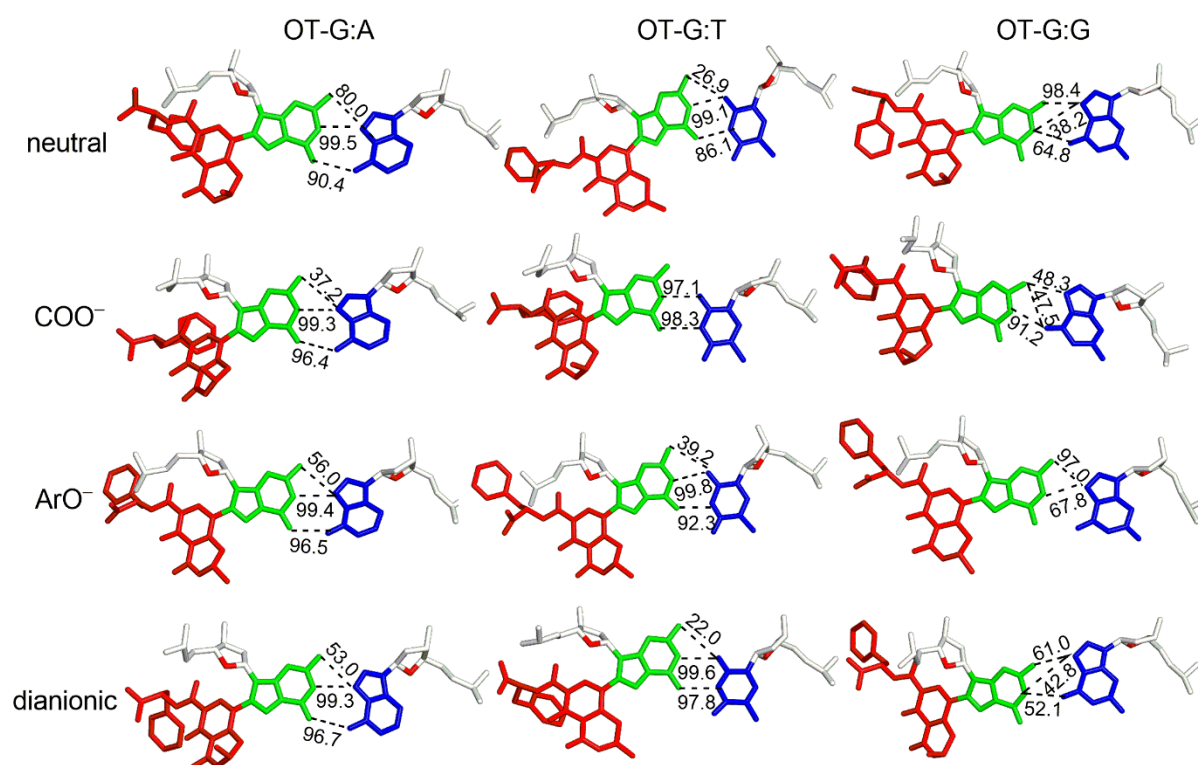

**Figure S7.** Lesion-site hydrogen bonding for OT-G in different ionization states at the G<sup>3</sup> position mispaired against A, T or G in the B adducted DNA conformation.

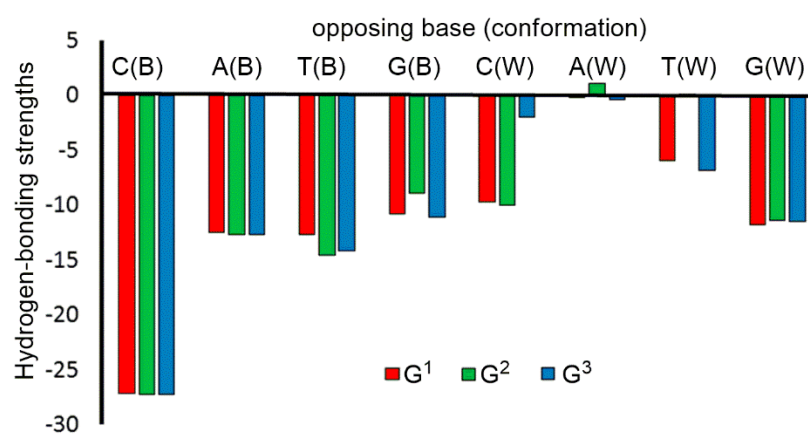

**Figure S8.** Hydrogen-bonding energies (kcal mol<sup>-1</sup>) between neutral OT-G and the opposing base in the B and W adducted DNA conformations for three sequence contexts. Data for C match is taken from reference 19 of the manuscript.

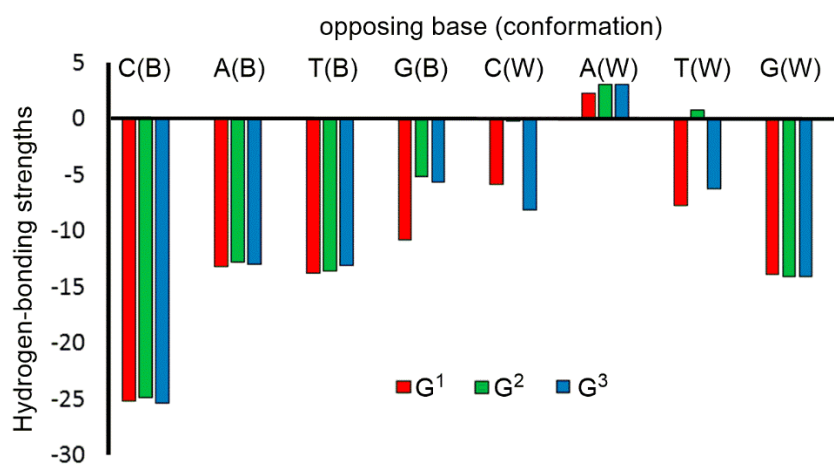

**Figure S9.** Hydrogen-bonding energies (kcal mol<sup>-1</sup>) between the ArO<sup>-</sup> OT-G and the opposing base in the B and W adducted DNA conformations for three sequence contexts.

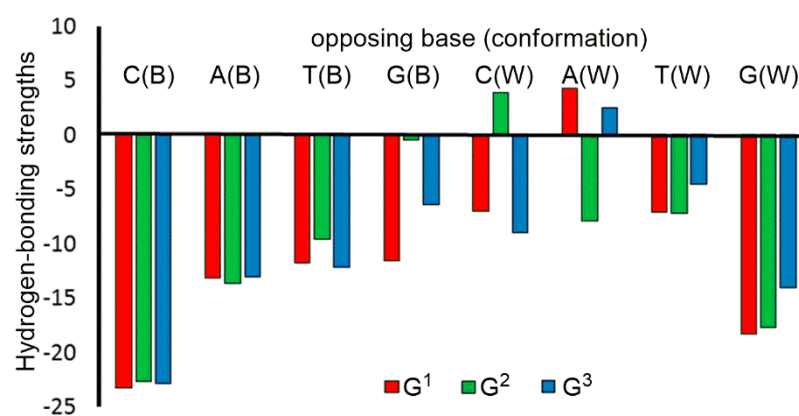

**Figure S10.** Hydrogen-bonding energies (kcal mol<sup>-1</sup>) between dianioinic OT-G and the opposing base in the B and W adducted DNA conformations for three sequence contexts. Data for C match is taken from reference 19 of the manuscript.

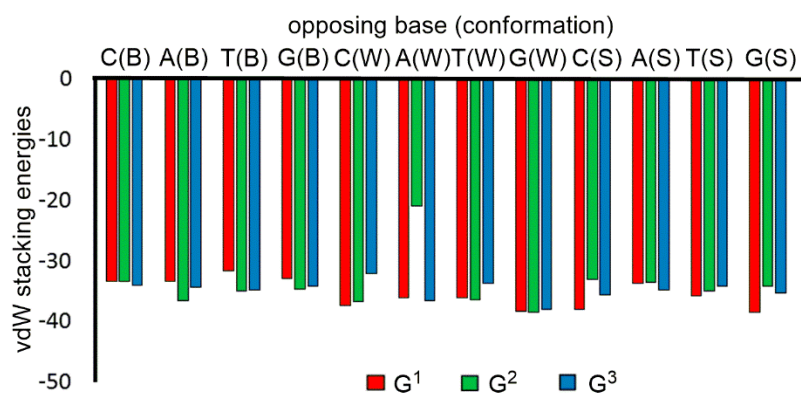

**Figure S11.** van der Waals (vdW) stacking energies (kcal mol<sup>-1</sup>) of neutral OT-G and the opposing base with the flanking base pairs (for the B and W conformers), and neutral OT-G with the flanking base pairs (for the S conformer) for different opposing bases and sequence contexts. Data for C match is taken from reference 19 of the manuscript.

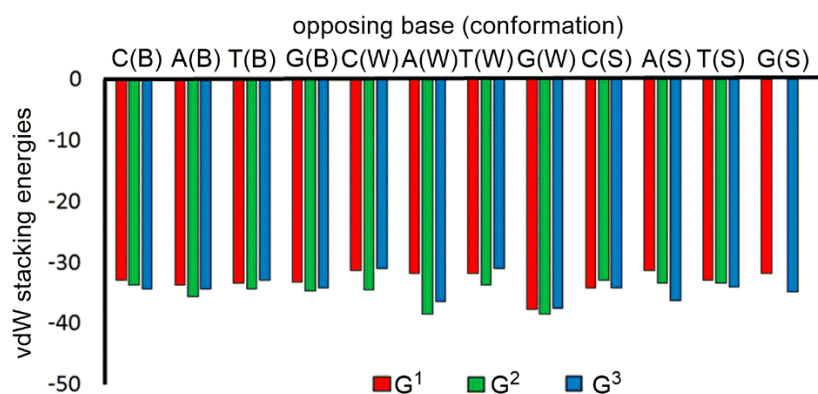

**Figure S12.** van der Waals (vdW) stacking energies (kcal mol<sup>-1</sup>) of ArO<sup>-</sup> OT-G and the opposing base with the flanking base pairs (for the B and W conformers), and ArO<sup>-</sup> OT-G with the flanking base pairs (for the S conformer) for different opposing bases and sequence contexts. Data for C match is taken from reference 19 of the manuscript.



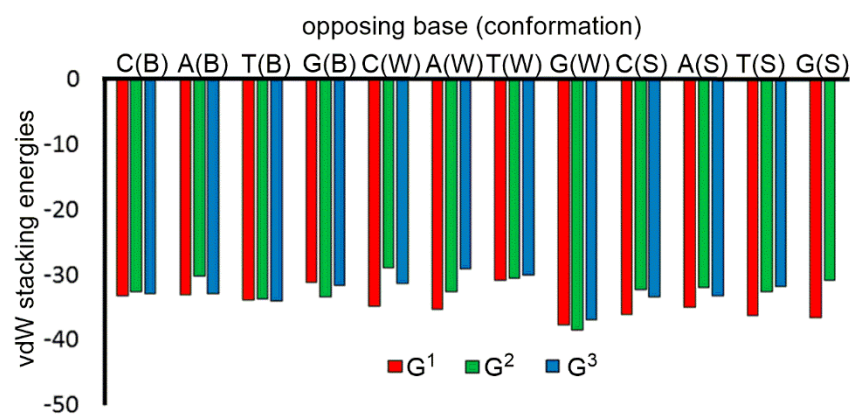

**Figure S13.** van der Waals (vdW) stacking energies (kcal mol<sup>-1</sup>) of dianionic OT-G and the opposing base with the flanking base pairs (for the B and W conformers), and dianionic OT-G with the flanking base pairs (for the S conformer) for different opposing bases and sequence contexts. Data for C match is taken from reference 199 of the manuscript.

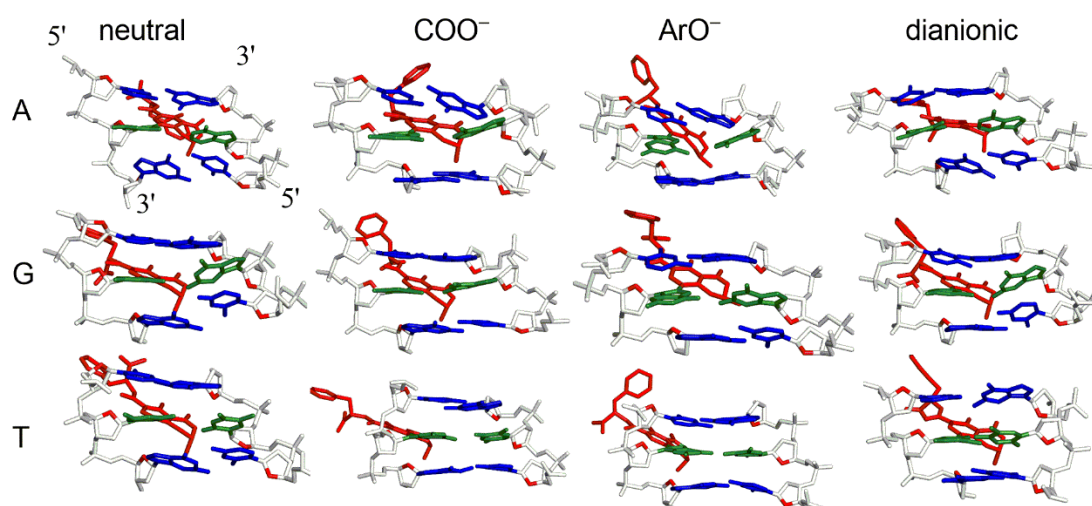

**Figure S14.** Representative lesion-site structures of the wedge (W) conformers of DNA containing OT-G in different ionization states at the G<sup>1</sup> position and paired opposite A, G or T. The OT moiety is shown in red, the damaged G moiety and the opposing base in green, and the base pairs flanking the lesion in blue.

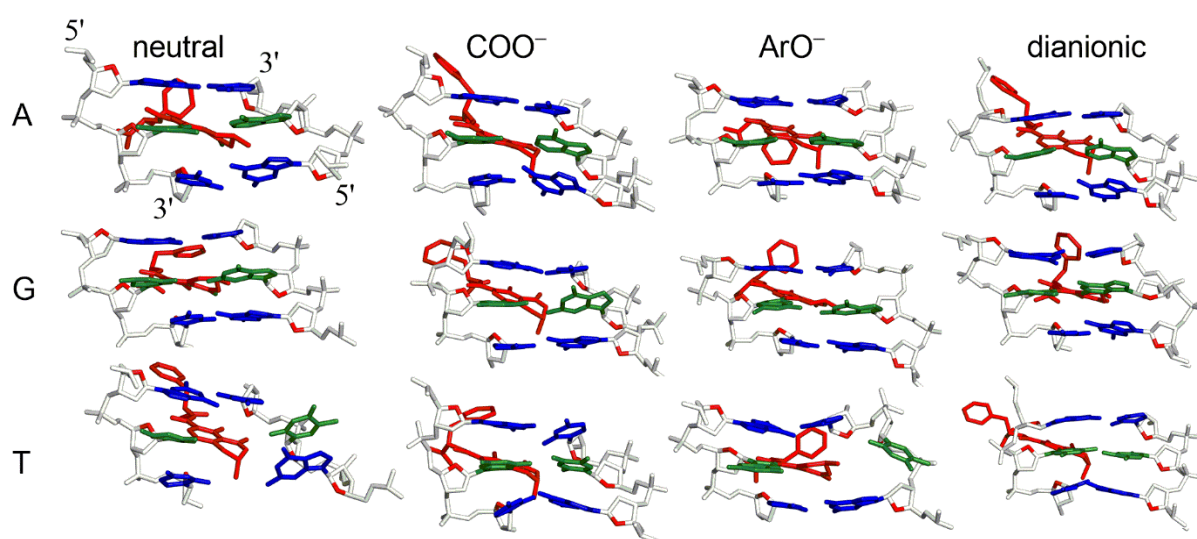

**Figure S15.** Representative lesion-site structures of the wedge (W) conformers of DNA containing OT-G in different ionization states at the G<sup>2</sup> position and paired opposite A, G or T. The OT moiety is shown in red, the damaged G moiety and the opposing base in green, and the base pairs flanking the lesion in blue.

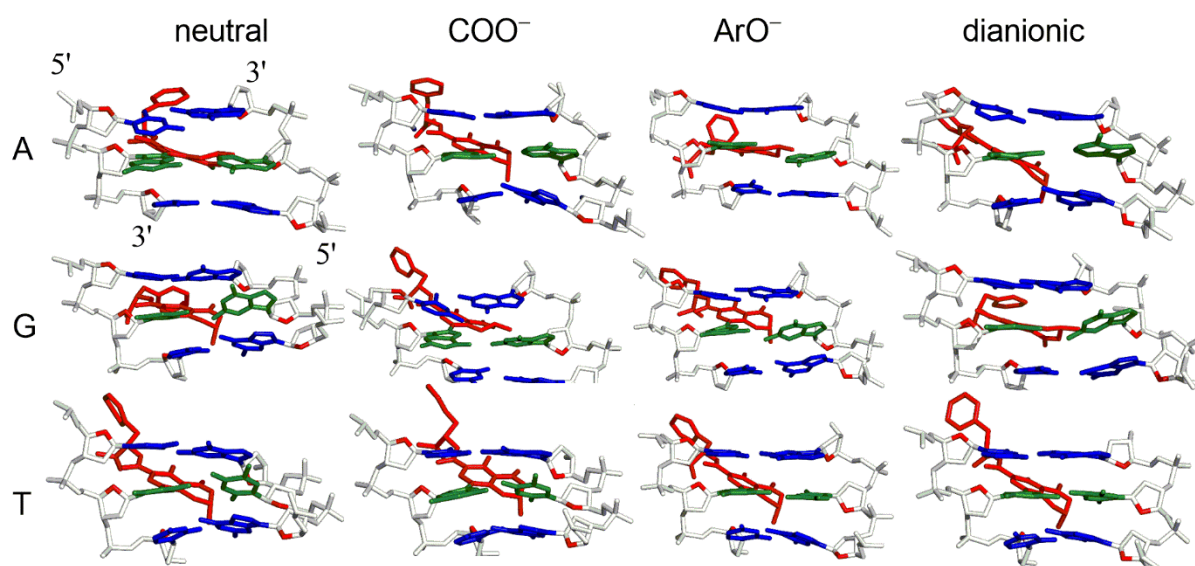

**Figure S16.** Representative lesion-site structures of the wedge (W) conformers of DNA containing OT-G in different ionization states at the G<sup>3</sup> position and paired opposite A, G or T. The OT moiety is shown in red, the damaged G moiety and the opposing base in green, and the base pairs flanking the lesion in blue.

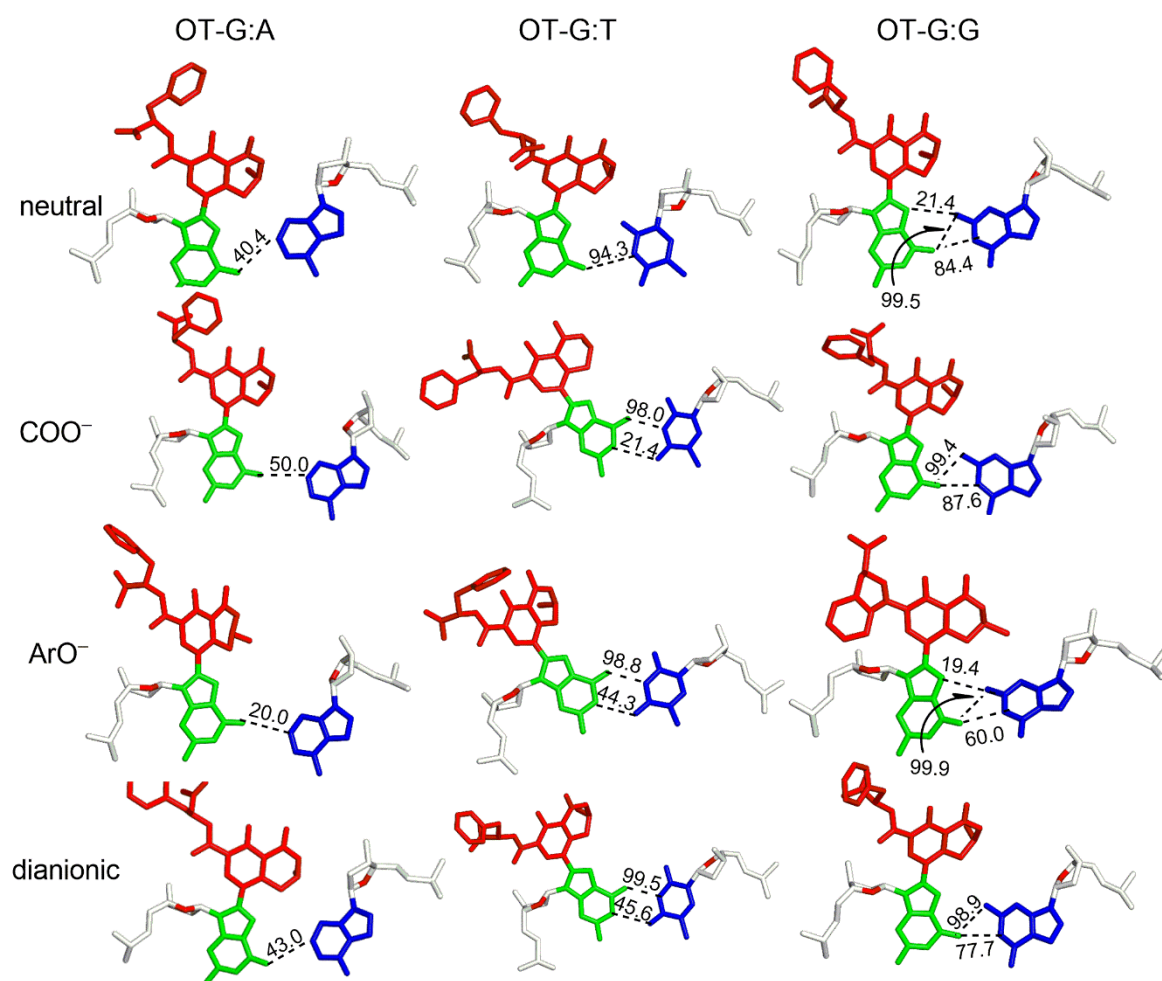

**Figure S17.** Lesion-site hydrogen bonding for OT-G in different ionization states at the G<sup>1</sup> position mispaired against A, T or G in the W adducted DNA conformation.

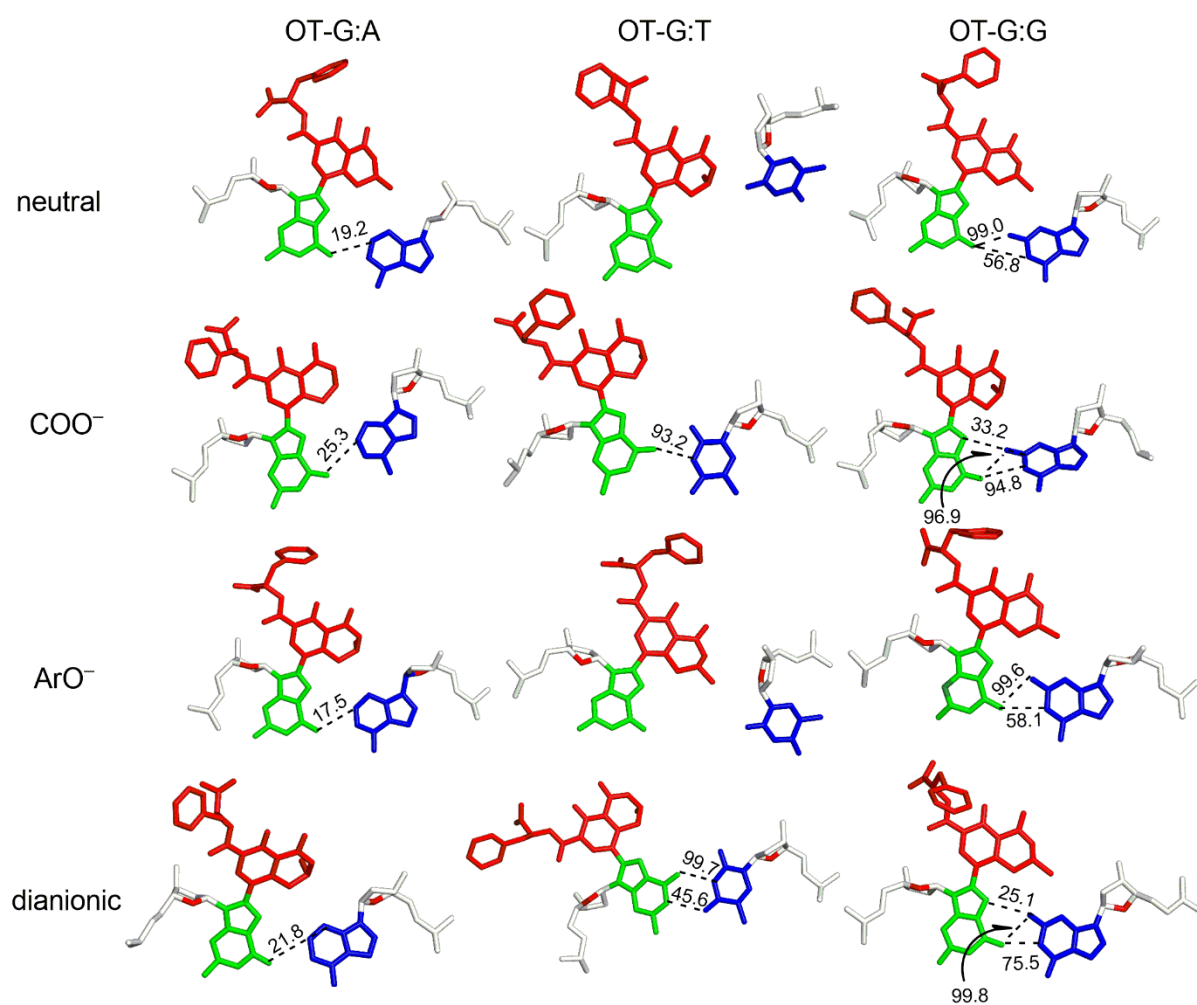

**Figure S18.** Lesion-site hydrogen bonding for OT-G in different ionization states at the G<sup>2</sup> position mispaired against A, T or G in the W adducted DNA conformation.

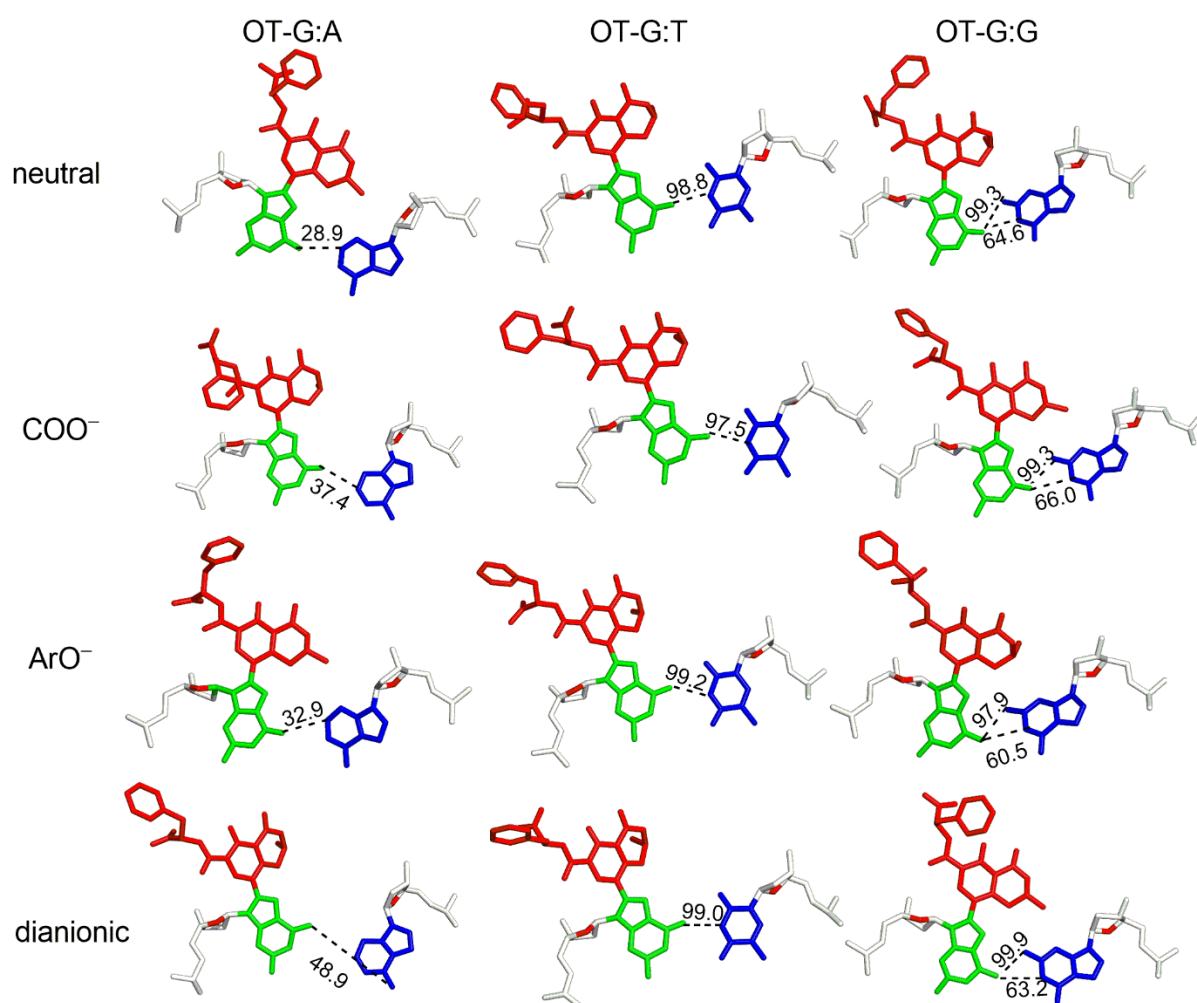

**Figure S19.** Lesion-site hydrogen bonding for OT-G in different ionization states at the G<sup>3</sup> position mispaired against A, T or G in the W adducted DNA conformation.

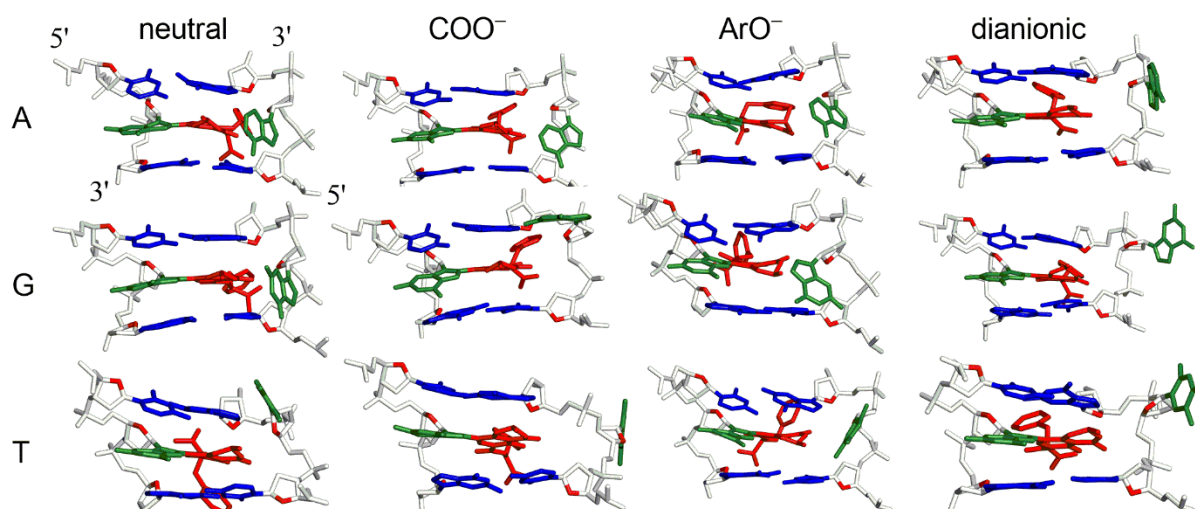

**Figure S20.** Representative lesion-site structures of the stacked (S) conformers containing OT-G in different ionization states at the  $\text{G}^1$  position and paired opposite A, G or T. The OT moiety is shown in red, the damaged G moiety and the opposing base in green, and the base pairs flanking the lesion in blue.



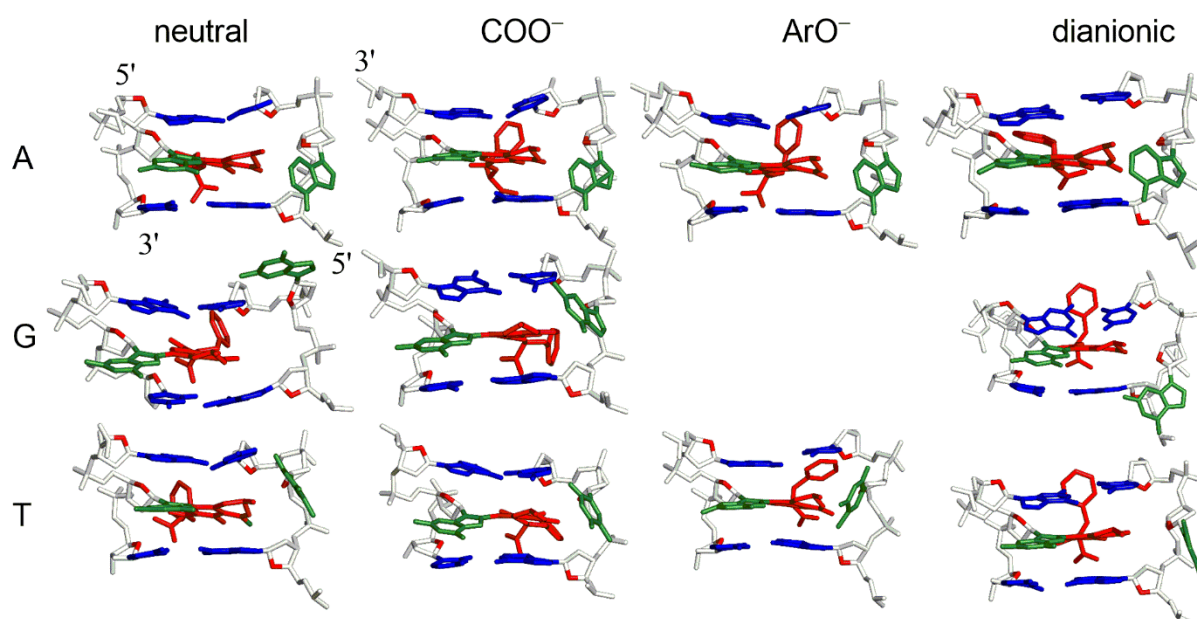

**Figure S21.** Representative lesion-site structures of the stacked (S) conformers of DNA containing OT-G in different ionization states at the G<sup>2</sup> position and paired opposite A, G or T. The OT moiety is shown in red, the damaged G moiety and the opposing base in green, and the base pairs flanking the lesion in blue.

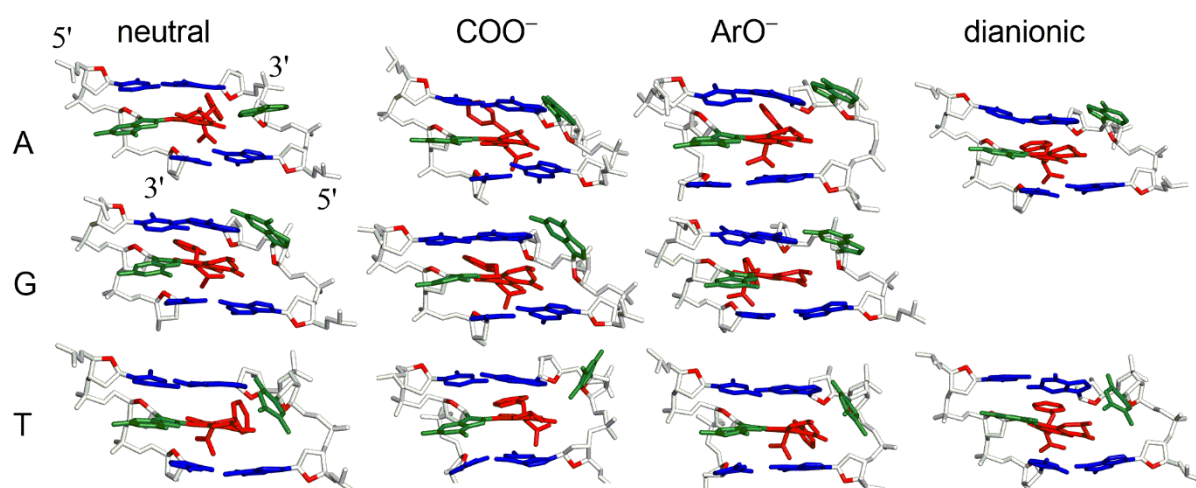

**Figure S22.** Representative lesion-site structures of the stacked (S) conformers containing OT-G in different ionization states at the G<sup>3</sup> position and paired opposite A, G or T. The OT moiety is shown in red, the damaged G moiety and the opposing base in green, and the base pairs flanking the lesion in blue.

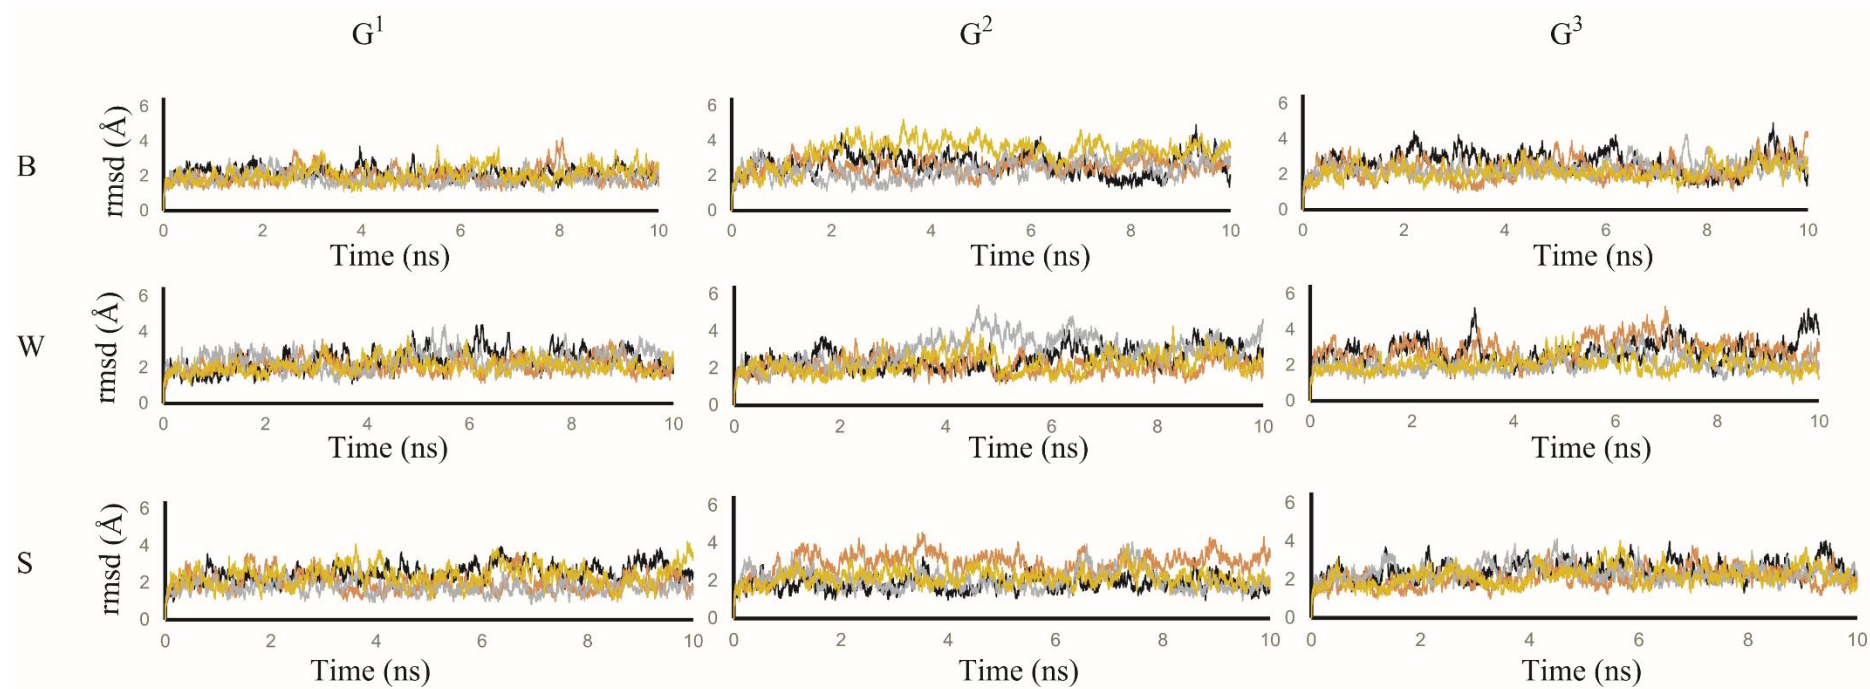

**Figure S23.** Backbone rmsd (Å) versus time for OT-G in the neutral (grey),  $\text{COO}^-$  (orange),  $\text{ArO}^-$  (yellow) and dianionic (black) ionization states mismatched against A in different (B, W and S) DNA conformations and ( $G^1$ ,  $G^2$  and  $G^3$ ) sequence contexts.

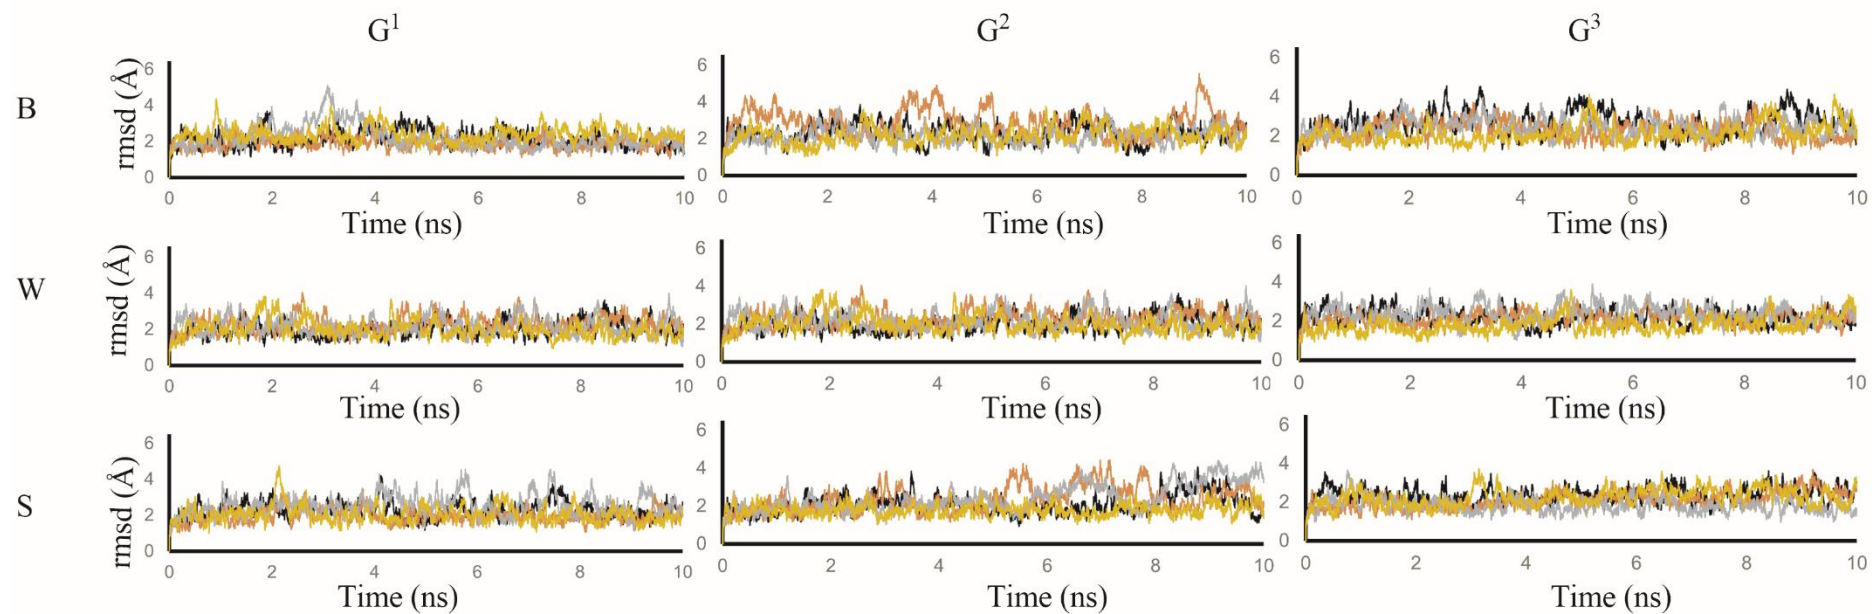

**Figure S24.** Backbone rmsd (Å) versus time for OT-G in the neutral (grey),  $\text{COO}^-$  (orange),  $\text{ArO}^-$  (yellow) and dianionic (black) ionization states mismatched against T in different (B, W and S) DNA conformations and ( $G^1$ ,  $G^2$  and  $G^3$ ) sequence contexts.

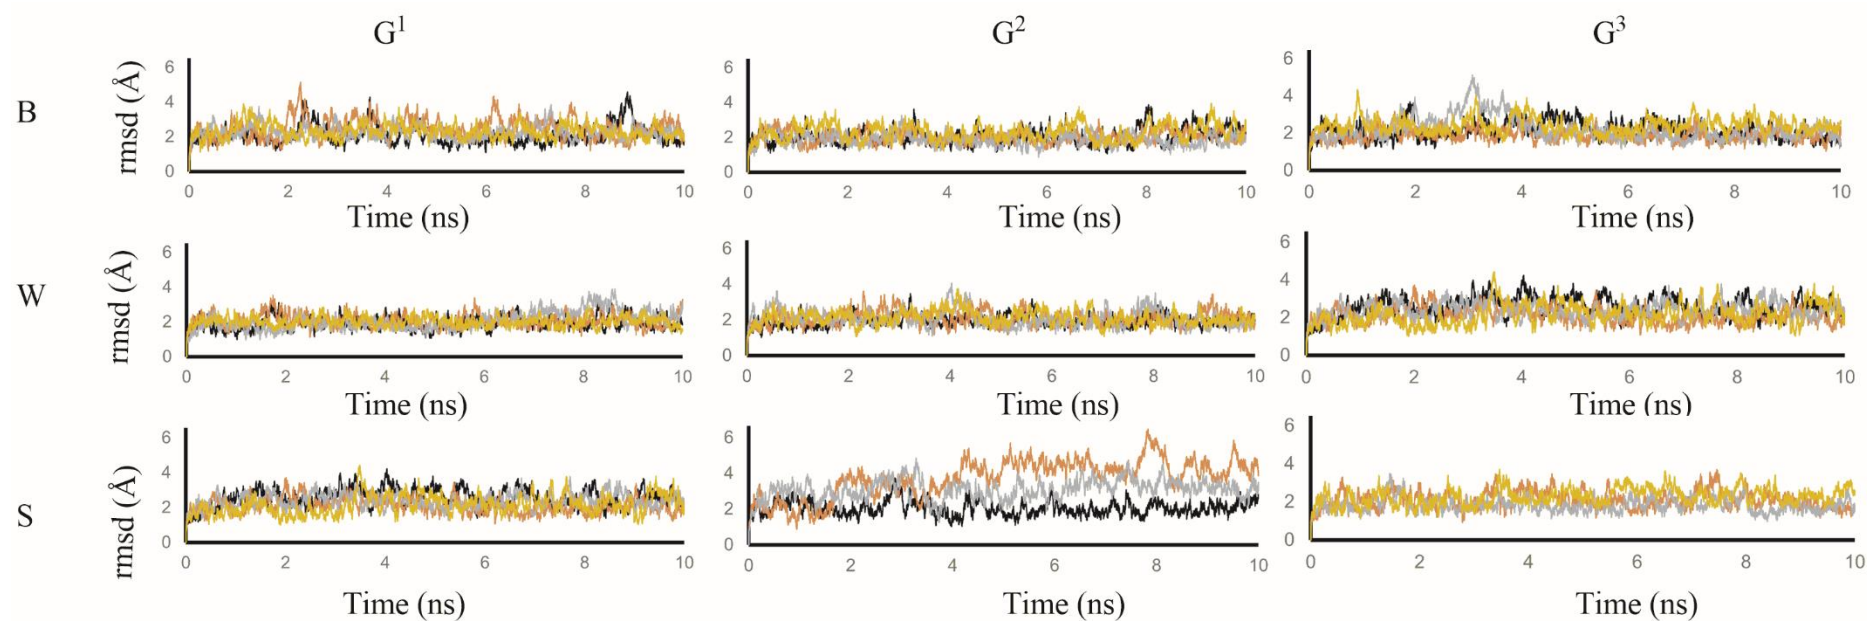

**Figure S25.** Backbone rmsd (Å) versus time for OT-G in the neutral (grey),  $\text{COO}^-$  (orange),  $\text{ArO}^-$  (yellow) and dianionic (black) ionization states mismatched against G in different (B, W and S) DNA conformations and ( $G^1$ ,  $G^2$  and  $G^3$ ) sequence contexts.

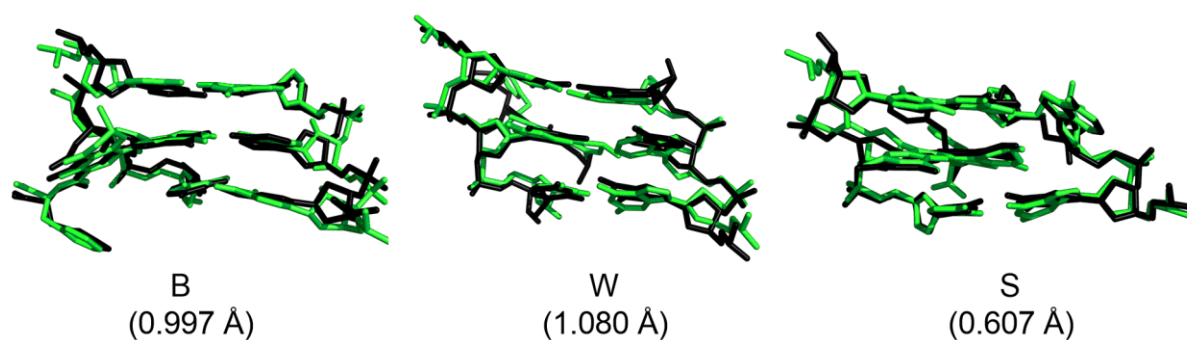

**Figure S26.** Overlay of the representative structures for the lesion site obtained from the last 10 ns of MD simulations carried out using different non-bonded cut-offs for the B, W and S conformers containing  $\text{COO}^-$  OT-G at the  $\text{G}^3$  position paired opposite A. The representative structures from simulations performed using an 8 Å water box and a non-bonded cut-off of 10 Å are shown in black, whereas those from simulations performed using a 10 Å water box and non-bonded cut-off of 9 Å are shown in green. The rmsd values for the overlaid structures (Å) are provided in parentheses.

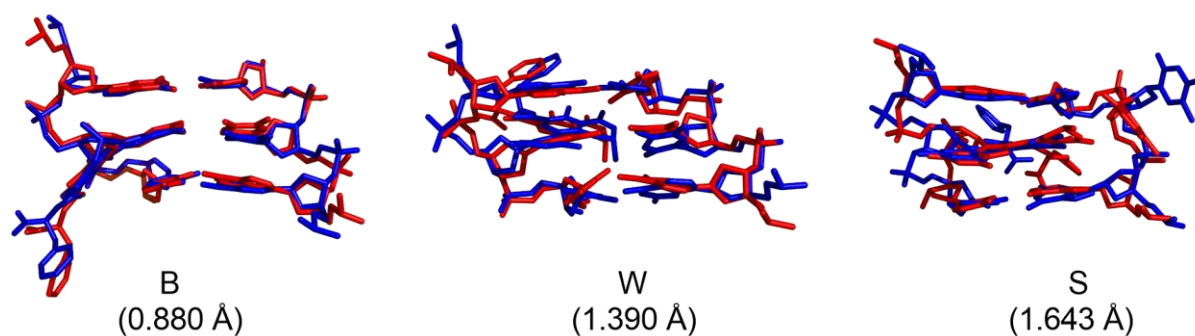

**Figure S27.** Overlay of the representative structures of the lesion site obtained from 40 ns and 500 ns MD production simulations for the B, W and S conformers containing COO<sup>-</sup> OT-G at the G<sup>2</sup> position and paired opposite T. The representative structure from 40 ns are shown in red, whereas those from 500 ns simulations are shown in blue. The rmsd values for the overlaid structures (Å) are provided in parentheses.

**Table S1.** Average values and standard deviations (in parentheses) for the  $\chi$  and  $\theta$  dihedral angles (deg.), and the backbone rmsd (Å) for different conformations of DNA containing different ionization states of OT-G paired against A at G<sup>1</sup>, G<sup>2</sup> or G<sup>3</sup>.

| OT-G Ionization state | Position       | Major Groove |            |                   | Wedge       |            |                   | Stacked     |             |                   |
|-----------------------|----------------|--------------|------------|-------------------|-------------|------------|-------------------|-------------|-------------|-------------------|
|                       |                | $\chi^a$     | $\theta^b$ | rmsd <sup>c</sup> | $\chi^a$    | $\theta^b$ | rmsd <sup>c</sup> | $\chi^a$    | $\theta^b$  | rmsd <sup>c</sup> |
| Neutral               | G <sup>1</sup> | 207.0 (9.7)  | 19.3 (6.3) | 1.9 (0.4)         | 74.4 (9.9)  | 16.3 (6.4) | 2.4 (0.5)         | 42.5 (7.0)  | 347.5 (5.9) | 1.8 (0.4)         |
| COO <sup>-</sup>      |                | 208.4 (8.0)  | 18.6 (6.3) | 2.0 (0.5)         | 75.0 (9.6)  | 17.4 (6.1) | 2.1 (0.4)         | 39.7 (7.1)  | 347.2 (5.9) | 2.0 (0.5)         |
| ArO <sup>-</sup>      |                | 214.0 (8.9)  | 15.0 (6.6) | 2.1 (0.5)         | 72.4 (9.8)  | 20.4 (6.1) | 2.1 (0.4)         | 36.8 (7.4)  | 349.9 (6.5) | 2.4 (0.6)         |
| Dianionic             |                | 207.9 (8.3)  | 19.6 (6.3) | 2.1 (0.3)         | 74.5 (9.2)  | 14.9 (6.2) | 2.4 (0.6)         | 38.0 (7.2)  | 347.5 (6.0) | 2.5 (0.5)         |
| Neutral               | G <sup>2</sup> | 205.5 (12.5) | 17.7 (6.9) | 2.3 (0.6)         | 71.7 (10.8) | 18.2 (6.8) | 3.0 (0.8)         | 38.9 (13.0) | 352.8 (9.0) | 2.6 (0.6)         |
| COO <sup>-</sup>      |                | 204.4 (10.7) | 20.2 (6.3) | 2.5 (0.4)         | 77.5 (9.9)  | 16.3 (6.7) | 2.1 (0.4)         | 36.0 (7.4)  | 348.3 (6.0) | 3.0 (0.5)         |
| ArO <sup>-</sup>      |                | 214.5 (11.7) | 20.6 (6.3) | 3.4 (0.7)         | 77.3 (9.8)  | 15.7 (6.8) | 2.2 (0.5)         | 36.8 (7.5)  | 348.4 (6.1) | 2.2 (0.4)         |
| Dianionic             |                | 206.0 (9.7)  | 21.5 (6.3) | 2.3 (0.4)         | 74.8 (9.6)  | 14.5 (6.5) | 2.5 (0.6)         | 37.4 (7.3)  | 347.9 (6.1) | 1.8 (0.4)         |
| Neutral               | G <sup>3</sup> | 217.5 (7.8)  | 12.6 (6.3) | 2.3 (0.4)         | 53.4 (21.5) | 3.6 (12.1) | 2.0 (0.4)         | 36.0 (8.1)  | 352.8 (6.5) | 2.4 (0.4)         |
| COO <sup>-</sup>      |                | 209.1 (9.0)  | 18.2 (6.3) | 2.3 (0.6)         | 77.6 (9.3)  | 17.0 (6.0) | 2.1 (0.5)         | 34.4 (7.8)  | 352.0 (6.4) | 2.1 (0.5)         |
| ArO <sup>-</sup>      |                | 211.5 (9.8)  | 16.9 (6.7) | 2.1 (0.4)         | 68.9 (15.9) | 13.1 (9.5) | 2.1 (0.4)         | 36.8 (7.2)  | 348.2 (6.0) | 2.2 (0.5)         |
| Dianionic             |                | 207.8 (8.8)  | 19.4 (6.2) | 2.2 (0.5)         | 73.4 (11.1) | 18.3 (6.2) | 2.6 (0.6)         | 34.6 (13.6) | 356.9 (8.3) | 2.5 (0.5)         |

<sup>a</sup>The dihedral angle  $\chi$  ( $\angle(\text{O4}'\text{C1}'\text{N9C4})$ , Figure 1) describes the orientation of the nucleobase with respect to sugar. <sup>b</sup>The dihedral angle  $\theta$  ( $\angle(\text{N9C8C10C11})$ , Figure 1) describes the orientation of the OT moiety with respect to nucleobase. <sup>c</sup>rmsd is calculated with respect to the first frame of the production run.



**Table S2.** Average values and standard deviations (in parentheses) for the  $\chi$  and  $\theta$  dihedral angles (deg.), and the backbone rmsd (Å) for different conformations of DNA containing different ionization states of OT-G paired against T at G<sup>1</sup>, G<sup>2</sup> or G<sup>3</sup>.

| OT-G<br>Ionization<br>state | Position       | Major Groove |            |                   | Wedge       |            |                   | Stacked    |             |                   |
|-----------------------------|----------------|--------------|------------|-------------------|-------------|------------|-------------------|------------|-------------|-------------------|
|                             |                | $\chi^a$     | $\theta^b$ | rmsd <sup>c</sup> | $\chi^a$    | $\theta^b$ | rmsd <sup>c</sup> | $\chi^a$   | $\theta^b$  | rmsd <sup>c</sup> |
| Neutral                     | G <sup>1</sup> | 219.8 (7.6)  | 10.2 (6.2) | 4.1 (0.8)         | 74.7 (9.8)  | 16.7 (6.1) | 2.2 (0.5)         | 38.8 (7.1) | 348.2 (6.0) | 2.5 (0.6)         |
| COO <sup>-</sup>            |                | 205.6 (9.2)  | 18.6 (6.2) | 2.1 (0.5)         | 79.9 (9.6)  | 16.7 (5.9) | 2.3 (0.5)         | 38.6 (7.1) | 346.7 (5.9) | 1.9 (0.4)         |
| ArO <sup>-</sup>            |                | 213.2 (8.7)  | 13.1 (6.4) | 2.3 (0.4)         | 80.0 (9.6)  | 17.6 (6.0) | 2.2 (0.4)         | 37.6 (7.3) | 348.9 (6.3) | 2.0 (0.5)         |
| Dianionic                   |                | 206.5 (9.9)  | 19.3 (6.2) | 2.2 (0.4)         | 77.9 (9.4)  | 17.6 (5.9) | 2.0 (0.4)         | 37.8 (7.2) | 347.4 (6.0) | 2.3 (0.4)         |
| Neutral                     | G <sup>2</sup> | 216.3 (7.6)  | 11.1 (6.3) | 2.1 (0.4)         | 78.7 (8.7)  | 17.3 (6.0) | 3.2 (0.8)         | 36.7 (7.5) | 350.0 (6.5) | 2.4 (0.7)         |
| COO <sup>-</sup>            |                | 203.8 (14.2) | 20.2 (6.3) | 2.9 (0.7)         | 77.2 (9.0)  | 16.0 (5.9) | 2.5 (0.9)         | 36.6 (7.4) | 346.9 (6.1) | 2.4 (0.7)         |
| ArO <sup>-</sup>            |                | 211.7 (8.0)  | 16.1 (6.2) | 2.2 (0.5)         | 78.7 (8.7)  | 17.3 (6.0) | 3.2 (0.8)         | 35.5 (8.4) | 349.4 (6.6) | 1.7 (0.3)         |
| Dianionic                   |                | 214.2 (10.4) | 14.2 (7.9) | 2.3 (0.5)         | 74.3 (10.4) | 18.0 (6.0) | 2.1 (0.4)         | 37.1 (7.4) | 347.8 (6.1) | 2.1 (0.5)         |
| Neutral                     | G <sup>3</sup> | 220.1 (9.5)  | 10.0 (7.0) | 2.4 (0.4)         | 78.2 (9.6)  | 17.0 (6.1) | 2.4 (0.5)         | 36.2 (7.6) | 352.4 (6.7) | 1.8 (0.4)         |
| COO <sup>-</sup>            |                | 206.1 (9.5)  | 18.5 (6.4) | 2.3 (0.5)         | 77.5 (9.8)  | 17.6 (5.8) | 2.1 (0.3)         | 36.2 (7.3) | 349.1 (6.2) | 2.1 (0.4)         |
| ArO <sup>-</sup>            |                | 213.7 (7.9)  | 14.7 (6.4) | 2.1 (0.5)         | 76.4 (9.9)  | 18.2 (5.9) | 1.8 (0.4)         | 34.8 (8.0) | 352.2 (7.1) | 2.3 (0.5)         |
| Dianionic                   |                | 216.7 (8.7)  | 10.8 (6.9) | 2.7 (0.6)         | 70.8 (10.4) | 18.4 (5.9) | 2.2 (0.4)         | 29.5 (8.6) | 358.1 (7.3) | 2.2 (0.5)         |

<sup>a</sup>The dihedral angle  $\chi$  ( $\angle(\text{O4}'\text{C1}'\text{N9C4})$ , Figure 1) describes the orientation of the nucleobase with respect to sugar. <sup>b</sup>The dihedral angle  $\theta$  ( $\angle(\text{N9C8C10C11})$ , Figure 1) describes the orientation of the OT moiety with respect to nucleobase. <sup>c</sup>rmsd is calculated with respect to the first frame of the production run.

**Table S3.** Average values and standard deviations (in parentheses) for the  $\chi$  and  $\theta$  dihedral angles (deg.), and the backbone rmsd (Å) for different conformations of DNA containing different ionization states of OT-G paired against G at G<sup>1</sup>, G<sup>2</sup> or G<sup>3</sup>.

| OT-G<br>Ionization<br>state | Position       | Major Groove |            |                   | Wedge       |            |                   | Stacked    |             |                   |
|-----------------------------|----------------|--------------|------------|-------------------|-------------|------------|-------------------|------------|-------------|-------------------|
|                             |                | $\chi^a$     | $\theta^b$ | rmsd <sup>c</sup> | $\chi^a$    | $\theta^b$ | rmsd <sup>c</sup> | $\chi^a$   | $\theta^b$  | rmsd <sup>c</sup> |
| Neutral                     | G <sup>1</sup> | 210.0 (11.2) | 19.0 (7.1) | 2.2 (0.4)         | 77.9 (8.8)  | 15.8 (6.1) | 2.1 (0.5)         | 43.3 (6.9) | 347.1 (5.9) | 2.0 (0.4)         |
| COO <sup>-</sup>            |                | 221.1 (7.8)  | 11.8 (6.3) | 2.5 (0.6)         | 77.2 (8.8)  | 16.5 (6.1) | 2.1 (0.4)         | 37.9 (7.2) | 347.3 (5.9) | 2.3 (0.5)         |
| ArO <sup>-</sup>            |                | 220.7 (8.2)  | 12.1 (6.4) | 2.3 (0.4)         | 76.0 (8.8)  | 16.5 (6.0) | 2.0 (0.3)         | 38.4 (7.6) | 348.7 (6.7) | 2.6 (0.5)         |
| Dianionic                   |                | 220.5 (8.5)  | 14.2 (7.1) | 2.1 (0.5)         | 76.6 (8.7)  | 15.3 (6.0) | 1.9 (0.4)         | 38.0 (7.2) | 347.2 (5.9) | 2.3 (0.4)         |
| Neutral                     | G <sup>2</sup> | 219.4 (7.2)  | 13.1 (6.1) | 1.9 (0.4)         | 78.2 (9.1)  | 14.4 (6.2) | 2.1 (0.5)         | 37.1 (7.7) | 350.0 (6.8) | 3.1 (0.6)         |
| COO <sup>-</sup>            |                | 206.5 (10.2) | 19.8 (6.5) | 2.0 (0.4)         | 82.9 (8.2)  | 16.3 (5.9) | 1.8 (0.4)         | 38.1 (7.2) | 347.8 (6.0) | 3.7 (1.0)         |
| ArO <sup>-</sup>            |                | 217.9 (8.5)  | 14.5 (6.5) | 2.3 (0.5)         | 77.9 (9.7)  | 13.9 (6.4) | 2.1 (0.4)         | —          | —           | —                 |
| Dianionic                   |                | 214.5 (7.8)  | 20.2 (6.7) | 2.1 (0.5)         | 70.0 (19.1) | 11.0 (9.4) | 2.0 (0.3)         | 39.1 (7.3) | 345.7 (6.2) | 2.1 (0.4)         |
| Neutral                     | G <sup>3</sup> | 217.9 (7.6)  | 12.8 (6.2) | 2.2 (0.7)         | 77.9 (8.9)  | 16.0 (6.1) | 2.4 (0.4)         | 36.5 (7.7) | 353.0 (6.3) | 1.8 (0.4)         |
| COO <sup>-</sup>            |                | 219.5 (9.3)  | 14.0 (7.1) | 1.9 (0.3)         | 77.6 (8.9)  | 15.7 (6.0) | 2.1 (0.4)         | 32.8 (8.2) | 354.0 (6.7) | 2.1 (0.5)         |
| ArO <sup>-</sup>            |                | 217.1 (7.6)  | 15.0 (6.3) | 2.4 (0.4)         | 74.6 (11.8) | 14.9 (7.4) | 2.2 (0.6)         | 35.1 (8.0) | 352.4 (7.0) | 2.3 (0.4)         |
| Dianionic                   |                | 214.6 (10.7) | 16.2 (7.9) | 2.1 (0.5)         | 75.5 (9.0)  | 14.8 (5.8) | 2.4 (0.5)         | —          | —           | —                 |

<sup>a</sup>The dihedral angle  $\chi$  ( $\angle(\text{O4}'\text{C1}'\text{N9C4})$ , Figure 1) describes the orientation of the nucleobase with respect to sugar. <sup>b</sup>The dihedral angle  $\theta$  ( $\angle(\text{N9C8C10C11})$ , Figure 1) describes the orientation of the OT moiety with respect to nucleobase. <sup>c</sup>rmsd is calculated with respect to the first frame of the production run.

**Table S4.** Occupancies (%) of the hydrogen bonds in the trimers composed of the OT-G:A mismatch, and the 3'– and 5'–flanking base pairs for the major groove and wedge conformations of damaged DNA.<sup>a</sup>

| Position       | Base Pair         | Hydrogen Bond (D–A) | Major Groove Conformation |                  |                  |           | Hydrogen Bond (D–A) | Wedge Conformation |                  |                  |           |
|----------------|-------------------|---------------------|---------------------------|------------------|------------------|-----------|---------------------|--------------------|------------------|------------------|-----------|
|                |                   |                     | neutral                   | COO <sup>–</sup> | ArO <sup>–</sup> | dianionic |                     | neutral            | COO <sup>–</sup> | ArO <sup>–</sup> | dianionic |
| G <sup>1</sup> | 5'C:G             | N4(C)–O6(G)         | 98.7                      | 97.4             | 99.0             | 98.1      | N4(C)–O6(G)         | 98.8               | 99.6             | 99.5             | 99.1      |
|                |                   | N1(G)–N3(C)         | 99.9                      | 99.6             | 99.9             | 99.9      | N1(G)–N3(C)         | 99.9               | 100.0            | 100.0            | 99.9      |
|                |                   | N2(G)–O2(C)         | 99.8                      | 99.8             | 99.7             | 99.8      | N2(G)–O2(C)         | 99.7               | 99.7             | 99.9             | 99.7      |
|                | G <sup>1</sup> :A | N1(OT-G)–N7(A)      | 99.8                      | 99.7             | 99.8             | 99.6      | N6(A)–O6(OT-G)      | –                  | –                | –                | –         |
|                |                   | N6(A)–O6(OT-G)      | 93.9                      | 94.4             | 96.1             | 94.4      | C2(A)–O6(OT-G)      | 40.4               | 50.0             | 20.0             | 43.0      |
|                |                   | N2(OT-G)–N7(A)      | 53.6                      | 50.2             | 59.4             | 64.8      |                     |                    |                  |                  |           |
|                | 3'G:C             | N4(C)–O6(G)         | 99.1                      | 98.8             | 99.2             | 94.6      | N4(C)–O6(G)         | 98.3               | 91.9             | 95.0             | 98.8      |
|                |                   | N1(G)–N3(C)         | 100.0                     | 100.0            | 100.0            | 100.0     | N1(G)–N3(C)         | 99.9               | 98.7             | 98.8             | 100.0     |
|                |                   | N2(G)–O2(C)         | 100.0                     | 99.9             | 99.9             | 99.9      | N2(G)–O2(C)         | 99.9               | 98.7             | 98.9             | 99.9      |
| G <sup>2</sup> | 5'G:C             | N4(C)–O6(G)         | 98.9                      | 98.5             | 98.5             | 98.1      | N4(C)–O6(G)         | 99.4               | 99.1             | 99.1             | 99.1      |
|                |                   | N1(G)–N3(C)         | 100.0                     | 99.9             | 100.0            | 99.9      | N1(G)–N3(C)         | 100.0              | 100.0            | 100.0            | 99.9      |
|                |                   | N2(G)–O2(C)         | 99.9                      | 99.9             | 99.8             | 99.9      | N2(G)–O2(C)         | 99.8               | 99.8             | 99.7             | 99.8      |
|                | G <sup>2</sup> :A | N1(OT-G)–N7(A)      | 99.2                      | 99.2             | 99.0             | 98.4      | N6(A)–O6(OT-G)      | –                  | –                | –                | –         |
|                |                   | N6(A)–O6(OT-G)      | 97.0                      | 97.9             | 97.5             | 98.6      | C2(A)–O6(OT-G)      | 19.2               | 25.3             | 17.5             | 21.8      |
|                |                   | N2(OT-G)–N7(A)      | 41.9                      | 32.4             | 37.3             | 36.1      | N3 (A)–C14(OT-G)    |                    |                  |                  | 19.6      |
|                | 3'C:G             | N4(C)–O6(G)         | 98.5                      | 98.9             | 97.9             | 98.8      | N4(C)–O6(G)         | 85.3               | 87.3             | 57.9             | 98.1      |
|                |                   | N1(G)–N3(C)         | 100.0                     | 100.0            | 99.1             | 100.0     | N1(G)–N3(C)         | 88.3               | 90.8             | 63.1             | 100.0     |
|                |                   | N2(G)–O2(C)         | 99.8                      | 99.8             | 99.3             | 99.8      | N2(G)–O2(C)         | 99.8               | 99.9             | 98.8             | 99.9      |
| G <sup>3</sup> | 5'C:G             | N4(C)–O6(G)         | 99.5                      | 98.1             | 98.7             | 98.2      | N4(C)–O6(G)         | 99.4               | 97.7             | 99.1             | 98.5      |
|                |                   | N1(G)–N3(C)         | 100.0                     | 99.9             | 99.9             | 99.9      | N1(G)–N3(C)         | 99.9               | 98.8             | 100.0            | 99.9      |
|                |                   | N2(G)–O2(C)         | 99.8                      | 99.9             | 99.9             | 99.9      | N2(G)–O2(C)         | 99.9               | 99.5             | 99.9             | 99.2      |
|                | G <sup>3</sup> :A | N1(OT-G)–N7(A)      | 99.5                      | 99.3             | 99.4             | 99.3      | N6(A)–O6(OT-G)      | –                  | –                | –                | 48.9      |
|                |                   | N6(A)–O6(OT-G)      | 90.4                      | 96.4             | 96.5             | 96.7      | C2(A)–O6(OT-G)      | 28.9               | 37.4             | 32.9             | –         |
|                |                   | N2(OT-G)–N7(A)      | 80.0                      | 37.2             | 56.0             | 53.0      |                     |                    |                  |                  |           |
|                | 3'C:G             | N4(C)–O6(G)         | 98.2                      | 98.8             | 98.4             | 98.7      | N4(C)–O6(G)         | 98.6               | 88.6             | 90.1             | 95.7      |
|                |                   |                     |                           |                  |                  |           |                     |                    |                  |                  |           |

|  |  |             |       |       |       |      |             |       |      |      |      |
|--|--|-------------|-------|-------|-------|------|-------------|-------|------|------|------|
|  |  | N1(G)–N3(C) | 100.0 | 100.0 | 100.0 | 99.9 | N1(G)–N3(C) | 100.0 | 97.1 | 96.3 | 95.9 |
|  |  | N2(G)–O2(C) | 99.6  | 99.8  | 99.7  | 99.7 | N2(G)–O2(C) | 99.7  | 99.4 | 99.7 | 94.0 |

<sup>a</sup>Hydrogen-bonding interactions were determined using a cut-off of 3.4 Å for the donor–acceptor distance and 120° for the donor–hydrogen–acceptor angle.

**Table S5.** Occupancies (%) of the hydrogen bonds in the trimers composed of the OT-G:G mismatch, and the 3'– and 5'–flanking base pairs for the major groove and wedge conformations of damaged DNA.<sup>a</sup>

| Position       | Base Pair         | Hydrogen Bond (D–A) | Major Groove Conformation |                  |                  |           | Hydrogen Bond (D–A) | Wedge Conformation |                  |                  |           |
|----------------|-------------------|---------------------|---------------------------|------------------|------------------|-----------|---------------------|--------------------|------------------|------------------|-----------|
|                |                   |                     | neutral                   | COO <sup>–</sup> | ArO <sup>–</sup> | dianionic |                     | neutral            | COO <sup>–</sup> | ArO <sup>–</sup> | dianionic |
| G <sup>1</sup> | 5'C:G             | N4(C)–O6(G)         | 97.6                      | 99.1             | 99.2             | 96.1      | N4(C)–O6(G)         | 99.1               | 98.3             | 99.0             | 98.9      |
|                |                   | N1(G)–N3(C)         | 99.8                      | 100.0            | 100.0            | 99.8      | N1(G)–N3(C)         | 100.0              | 99.9             | 99.9             | 99.9      |
|                |                   | N2(G)–O2(C)         | 99.7                      | 99.7             | 99.7             | 99.4      | N2(G)–O2(C)         | 99.8               | 99.9             | 99.9             | 99.4      |
|                | G <sup>1</sup> :G | N1(OT-G)–O6(G)      | 50.0                      | 77.4             | 76.9             | 96.5      | N1(G)–O6(OT-G)      | 84.4               | 87.6             | 60.0             | 77.7      |
|                |                   | N2(OT-G)–N7(G)      | 84.2                      | 92.9             | 94.8             | 27.9      | N2(G)–O6(OT-G)      | 99.5               | 99.4             | 99.9             | 98.9      |
|                |                   | N1(OT-G)–N7(G)      | 43.3                      | –                | –                | –         | N2(G)–N7 (OT-G)     | 21.4               | –                | 19.4             | –         |
|                |                   | N2(OT-G)–O6(G)      | –                         | 22.7             | 21.6             | 75.0      | N2 (G)–C13 (OT-G)   | –                  | –                | 33.1             | –         |
|                | 3'G:C             | N4(C)–O6(G)         | 98.7                      | 98.8             | 98.5             | 96.7      | N4(C)–O6(G)         | 98.9               | 98.9             | 99.0             | 98.7      |
|                |                   | N1(G)–N3(C)         | 100.0                     | 100.0            | 99.9             | 99.7      | N1(G)–N3(C)         | 99.9               | 100.0            | 99.9             | 99.9      |
|                |                   | N2(G)–O2(C)         | 99.8                      | 99.9             | 99.9             | 99.8      | N2(G)–O2(C)         | 99.8               | 99.8             | 99.9             | 99.8      |
| G <sup>2</sup> | 5'G:C             | N4(C)–O6(G)         | 98.8                      | 97.6             | 98.5             | 98.9      | N4(C)–O6(G)         | 99.0               | 97.7             | 99.3             | 99.1      |
|                |                   | N1(G)–N3(C)         | 99.9                      | 99.9             | 99.9             | 99.9      | N1(G)–N3(C)         | 100.0              | 100.0            | 100.0            | 100.0     |
|                |                   | N2(G)–O2(C)         | 99.9                      | 99.9             | 99.9             | 99.8      | N2(G)–O2(C)         | 99.8               | 98.8             | 99.8             | 99.8      |
|                | G <sup>2</sup> :G | N1(OT-G)–O6(G)      | –                         | –                | –                | –         | N1(G)–O6(OT-G)      | 56.8               | 94.8             | 58.1             | 75.5      |
|                |                   | N2(OT-G)–N7(G)      | 96.1                      | 84.3             | 95.1             | 76.2      | N2(G)–O6(OT-G)      | 99.0               | 96.9             | 99.6             | 99.8      |
|                |                   | N1(OT-G)–N7(G)      | 61.6                      | 71.9             | 70.1             | 81.3      | N2 (G)–N7 (OT-G)    | –                  | 33.2             | –                | 25.1      |
|                |                   | N1(OT-G)–O6(G)      | –                         | –                | –                | –         | N2 (G)–C13 (OT-G)   | –                  | –                | 24.0             | 30.2      |
|                | 3'C:G             | N4(C)–O6(G)         | 98.4                      | 98.0             | 98.1             | 97.3      | N4(C)–O6(G)         | 95.1               | 93.2             | 98.4             | 98.4      |
|                |                   | N1(G)–N3(C)         | 100.0                     | 100.0            | 100.0            | 100.0     | N1(G)–N3(C)         | 99.5               | 99.6             | 99.9             | 99.8      |
|                |                   | N2(G)–O2(C)         | 99.8                      | 99.8             | 99.8             | 99.9      | N2(G)–O2(C)         | 98.4               | 99.5             | 99.4             | 99.6      |
|                | 5'C:G             | N4(C)–O6(G)         | 99.4                      | 97.4             | 99.2             | 97.9      | N4(C)–O6(G)         | 99.3               | 99.2             | 98.6             | 99.3      |
|                |                   | N1(G)–N3(C)         | 100.0                     | 99.7             | 99.9             | 99.9      | N1(G)–N3(C)         | 100.0              | 100.0            | 99.9             | 99.9      |
|                |                   | N2(G)–O2(C)         | 99.8                      | 99.8             | 99.8             | 99.8      | N2(G)–O2(C)         | 99.8               | 99.8             | 99.9             | 99.9      |
|                | G <sup>3</sup> :G | N1(OT-G)–O6(G)      | 64.8                      | 91.2             | –                | 52.1      | N1(G)–O6(OT-G)      | 64.6               | 66.0             | 60.5             | 63.2      |
|                |                   | N2(OT-G)–N7(G)      | 98.4                      | 48.3             | 97.0             | 61.0      | N2(G)–O6(OT-G)      | 99.3               | 99.3             | 97.9             | 99.9      |

|                |       |                |      |      |       |      |             |      |      |      |      |
|----------------|-------|----------------|------|------|-------|------|-------------|------|------|------|------|
| G <sup>3</sup> |       | N1(OT-G)–N7(G) | 38.2 | –    | 67.8  | 42.8 |             |      |      |      |      |
|                |       | N2(OT-G)–O6(G) | –    | 47.5 | –     | –    |             |      |      | –    | –    |
|                | 3'C:G | N4(C)–O6(G)    | 97.0 | 97.1 | 96.8  | 96.7 | N4(C)–O6(G) | 95.3 | 95.9 | 92.7 | 97.9 |
|                |       | N1(G)–N3(C)    | 99.9 | 99.5 | 100.0 | 99.9 | N1(G)–N3(C) | 99.4 | 99.6 | 97.6 | 99.8 |
|                |       | N2(G)–O2(C)    | 99.7 | 99.9 | 99.7  | 99.7 | N2(G)–O2(C) | 99.4 | 99.5 | 99.5 | 99.5 |

<sup>a</sup>Hydrogen-bonding interactions were determined using a cut-off of 3.4 Å for the donor–acceptor distance and 120° for the donor–hydrogen–acceptor angle.

**Table S6:** Occupancies (%) of the hydrogen bonds in the trimers composed of the OT-G:T mismatch, and the 3'– and 5'–flanking base pairs for the major groove and wedge conformations of damaged DNA.<sup>a</sup>

| Position       | Base Pair         | Hydrogen Bond (D–A) | Major Groove Conformation |                  |                  |           | Hydrogen Bond (D–A) | Wedge Conformation |                  |                  |           |
|----------------|-------------------|---------------------|---------------------------|------------------|------------------|-----------|---------------------|--------------------|------------------|------------------|-----------|
|                |                   |                     | neutral                   | COO <sup>–</sup> | ArO <sup>–</sup> | dianionic |                     | neutral            | COO <sup>–</sup> | ArO <sup>–</sup> | dianionic |
| G <sup>1</sup> | 5'C:G             | N4(C)–O6(G)         | 99.0                      | 98.3             | 98.8             | 97.8      | N4(C)–O6(G)         | 95.6               | 99.2             | 98.3             | 98.9      |
|                |                   | N1(G)–N3(C)         | 100.0                     | 99.9             | 100.0            | 100.0     | N1(G)–N3(C)         | 100.0              | 100.0            | 99.9             | 100.0     |
|                |                   | N2(G)–O2(C)         | 99.9                      | 99.8             | 100.0            | 99.9      | N2(G)–O2(C)         | 99.8               | 99.5             | 99.3             | 99.6      |
|                | G <sup>1</sup> :T | N2(OT-G)–O2(T)      | 94.8                      | 32.0             | 36.2             | 42.4      | N3(T)–O6(OT-G)      | 94.3               | 98.0             | 98.8             | 99.5      |
|                |                   | N1(OT-G)–O2(T)      | 97.4                      | 99.7             | 99.9             | 99.7      | O4(T)–N1(OT-G)      | –                  | 21.4             | 44.3             | 45.6      |
|                |                   | O6(OT-G)–N3(T)      | –                         | 86.4             | 92.8             | 86.7      |                     |                    |                  |                  |           |
|                | 3'G:C             | N4(C)–O6(G)         | 97.8                      | 96.8             | 98.8             | 95.4      | N4(C)–O6(G)         | 98.5               | 99.0             | 98.9             | 99.3      |
|                |                   | N1(G)–N3(C)         | 99.9                      | 100.0            | 100.0            | 100.0     | N1(G)–N3(C)         | 99.9               | 100.0            | 99.9             | 100.0     |
|                |                   | N2(G)–O2(C)         | 99.7                      | 99.8             | 99.8             | 99.8      | N2(G)–O2(C)         | 99.8               | 99.7             | 99.7             | 99.6      |
| G <sup>2</sup> | 5'G:C             | N4(C)–O6(G)         | 99.1                      | 99.1             | 99.4             | 99.1      | N4(C)–O6(G)         | 99.4               | 95.6             | 98.6             | 98.1      |
|                |                   | N1(G)–N3(C)         | 99.9                      | 99.9             | 100.0            | 100.0     | N1(G)–N3(C)         | 100.0              | 99.9             | 100.0            | 99.9      |
|                |                   | N2(G)–O2(C)         | 99.9                      | 99.8             | 100.0            | 99.9      | N2(G)–O2(C)         | 99.8               | 99.2             | 99.8             | 99.8      |
|                | G <sup>2</sup> :T | N2(OT-G)–O2(T)      | 29.2                      | –                | 30.1             | –         | N3(T)–O6(OT-G)      | –                  | 93.2             | –                | 99.7      |
|                |                   | N1(OT-G)–O2(T)      | 99.8                      | 87.4             | 100.0            | 88.1      | O4 (T)–N1(OT-G)     | –                  | –                | –                | 45.6      |
|                |                   | O6(OT-G)–N3(T)      | 96.4                      | 99.7             | 98.7             | 99.4      |                     |                    |                  |                  |           |
|                | 3'C:G             | N4(C)–O6(G)         | 98.3                      | 98.5             | 98.9             | 98.5      | N4(C)–O6(G)         | 22.4               | 97.4             | 98.2             | 99.0      |
|                |                   | N1(G)–N3(C)         | 100.0                     | 99.7             | 100.0            | 100.0     | N1(G)–N3(C)         | 50.4               | 99.8             | 99.9             | 99.9      |
|                |                   | N2(G)–O2(C)         | 99.9                      | 100.0            | 99.8             | 99.6      | N2(G)–O2(C)         | 25.3               | 97.4             | 99.9             | 99.3      |
| G <sup>3</sup> | 5'C:G             | N4(C)–O6(G)         | 98.0                      | 97.7             | 99.0             | 97.7      | N4(C)–O6(G)         | 95.4               | 99.2             | 99.1             | 99.1      |
|                |                   | N1(G)–N3(C)         | 99.8                      | 100.0            | 100.0            | 99.8      | N1(G)–N3(C)         | 99.9               | 99.9             | 99.9             | 100.0     |
|                |                   | N2(G)–O2(C)         | 99.9                      | 99.9             | 100.0            | 100.0     | N2(G)–O2(C)         | 99.3               | 99.7             | 99.5             | 99.8      |
|                | G <sup>3</sup> :T | N2(OT-G)–O2(T)      | 26.9                      | –                | 39.2             | 22.0      | N3(T)–O6(OT-G)      | 98.8               | 97.5             | 99.2             | 99.0      |
|                |                   | N1(OT-G)–O2(T)      | 99.1                      | 97.1             | 99.8             | 99.6      |                     |                    |                  |                  |           |
|                |                   | O6(OT-G)–N3(T)      | 86.1                      | 98.3             | 92.3             | 97.8      |                     |                    |                  |                  |           |
|                | 3'C:G             | N4(C)–O6(G)         | 98.1                      | 98.4             | 98.3             | 98.3      | N4(C)–O6(G)         | 97.6               | 99.2             | 99.3             | 98.9      |

|  |  |             |      |      |      |      |             |      |      |      |      |
|--|--|-------------|------|------|------|------|-------------|------|------|------|------|
|  |  | N1(G)–N3(C) | 99.9 | 99.9 | 99.8 | 99.9 | N1(G)–N3(C) | 99.7 | 99.9 | 99.9 | 99.7 |
|  |  | N2(G)–O2(C) | 99.8 | 99.8 | 99.7 | 99.6 | N2(G)–O2(C) | 99.6 | 99.0 | 99.5 | 98.8 |

<sup>a</sup>Hydrogen-bonding interactions were determined using a cut-off of 3.4 Å for the donor–acceptor distance and 120° for the donor–hydrogen–acceptor angle.



**Table S7.** Hydrogen-bonding energies (kcal mol<sup>-1</sup>) between the OT-G and opposing base for different conformations of adducted DNA containing OT-G paired against C, A, T and G.

| Position<br>(conformer)          | Ionization<br>State | Hydrogen Bonding Energies |             |             |             |
|----------------------------------|---------------------|---------------------------|-------------|-------------|-------------|
|                                  |                     | C <sup>a</sup>            | A           | T           | G           |
| G <sup>1</sup><br>(Major Groove) | Neutral             | -27.1                     | -12.5 (2.3) | -12.7 (1.8) | -10.8 (4.7) |
|                                  | COO <sup>-</sup>    | -25.4                     | -12.3 (2.3) | -12.9 (2.1) | -11.8 (3.8) |
|                                  | ArO <sup>-</sup>    | -25.2                     | -13.2 (2.3) | -13.8 (2.1) | -10.8 (3.9) |
|                                  | Dianionic           | -23.2                     | -13.1(2.5)  | -11.7 (2.2) | -11.6 (2.6) |
| G <sup>2</sup><br>(Major Groove) | Neutral             | -27.2                     | -12.7 (2.2) | -14.6 (2.0) | -8.9 (3.6)  |
|                                  | COO <sup>-</sup>    | -25.0                     | -12.5 (2.2) | -11.2 (2.5) | -4.9 (3.7)  |
|                                  | ArO <sup>-</sup>    | -24.9                     | -12.8 (2.3) | -13.6 (2.0) | -5.2 (3.1)  |
|                                  | Dianionic           | -22.6                     | -13.6 (2.4) | -9.6 (2.5)  | -0.5 (3.2)  |
| G <sup>3</sup><br>(Major Groove) | Neutral             | -27.2                     | -12.7 (2.3) | -14.2 (2.1) | -11.1 (3.9) |
|                                  | COO <sup>-</sup>    | -25.1                     | -12.2 (2.3) | -12.1 (2.2) | -12.9 (3.8) |
|                                  | ArO <sup>-</sup>    | -25.4                     | -13.0 (2.3) | -13.1 (2.1) | -5.7 (3.3)  |
|                                  | Dianionic           | -22.8                     | -13.0 (2.4) | -12.1 (2.1) | -6.4 (5.8)  |
| G <sup>1</sup><br>(Wedge)        | Neutral             | -9.7                      | -0.2 (0.8)  | -6.0 (1.7)  | -11.8 (1.5) |
|                                  | COO <sup>-</sup>    | -9.7                      | 1.2 (0.3)   | -6.6 (3.3)  | -13.8 (1.7) |
|                                  | ArO <sup>-</sup>    | -5.9                      | 2.3 (0.9)   | -7.7 (3.9)  | -13.9 (1.7) |
|                                  | Dianionic           | -7.0                      | 4.3 (0.8)   | -7.1 (3.7)  | -18.3 (2.1) |
| G <sup>2</sup><br>(Wedge)        | Neutral             | -10.0                     | 1.1 (0.8)   | 0.0 (1.0)   | -11.4 (1.8) |
|                                  | COO <sup>-</sup>    | 0.9                       | 1.1 (0.8)   | -2.5 (3.4)  | -13.6 (1.7) |
|                                  | ArO <sup>-</sup>    | -0.2                      | 3.1 (0.8)   | 0.8 (1.0)   | -14.1 (2.0) |
|                                  | Dianionic           | 3.9                       | -7.9 (1.2)  | -7.2 (3.7)  | -17.7 (2.1) |
| G <sup>3</sup><br>(Wedge)        | Neutral             | -2.0                      | -0.4 (0.9)  | -6.8 (2.2)  | -11.5 (1.6) |
|                                  | COO <sup>-</sup>    | -10.9                     | 2.1 (0.7)   | -5.4 (3.1)  | -13.3 (1.7) |
|                                  | ArO <sup>-</sup>    | -8.1                      | 3.1 (0.8)   | -6.3 (3.1)  | -14.1 (2.0) |
|                                  | Dianionic           | -9.0                      | 2.5 (4.4)   | -4.5 (3.2)  | -14.0 (1.8) |

<sup>a</sup>Data for C match has been taken from reference 19 of the manuscript.

**Table S8.** van der Waals stacking energies (kcal mol<sup>-1</sup>) for different conformations of adducted DNA containing OT-G paired against C, A, T and G.

| Position (conformer)             | Ionization State | Stacking Energies |             |             |             |
|----------------------------------|------------------|-------------------|-------------|-------------|-------------|
|                                  |                  | C <sup>a</sup>    | A           | T           | G           |
| G <sup>1</sup><br>(Major Groove) | Neutral          | -33.4             | -33.5 (1.5) | -31.6 (2.0) | -32.9 (1.9) |
|                                  | COO <sup>-</sup> | -33.1             | -33.3 (1.6) | -33.9 (1.6) | -33.2 (1.9) |
|                                  | ArO <sup>-</sup> | -33.0             | -33.7 (1.6) | -33.4 (1.9) | -33.3 (1.8) |
|                                  | Dianionic        | -33.2             | -33.1 (1.8) | -33.9 (1.6) | -31.2 (1.9) |
| G <sup>2</sup><br>(Major Groove) | Neutral          | -33.4             | -36.6 (2.0) | -35.1 (2.1) | -34.7 (1.7) |
|                                  | COO <sup>-</sup> | -34.8             | -35.2 (1.8) | -33.9 (1.9) | -34.6 (1.6) |
|                                  | ArO <sup>-</sup> | -33.7             | -35.6 (1.7) | -34.4 (1.6) | -34.7 (1.6) |
|                                  | Dianionic        | -32.7             | -30.2 (1.6) | -33.7 (1.6) | -33.5 (1.7) |
| G <sup>3</sup><br>(Major Groove) | Neutral          | -34.1             | -34.4 (1.9) | -34.9 (2.4) | -34.2 (1.8) |
|                                  | COO <sup>-</sup> | -33.1             | -34.4 (1.7) | -33.7 (1.7) | -31.9 (1.9) |
|                                  | ArO <sup>-</sup> | -34.4             | -34.4 (1.6) | -32.9 (2.0) | -34.2 (1.7) |
|                                  | Dianionic        | -33.0             | -33.0 (1.5) | -34.1 (1.9) | -31.7 (2.3) |
| G <sup>1</sup><br>(Wedge)        | Neutral          | -37.4             | -36.2 (1.8) | -36.1 (1.5) | -38.3 (1.6) |
|                                  | COO <sup>-</sup> | -38.3             | -32.2 (1.8) | -32.5 (2.5) | -38.7 (1.6) |
|                                  | ArO <sup>-</sup> | -31.4             | -31.8 (2.0) | -31.9 (1.6) | -38.5 (1.6) |
|                                  | Dianionic        | -34.8             | -35.4 (1.5) | -30.9 (1.9) | -37.7 (1.9) |
| G <sup>2</sup><br>(Wedge)        | Neutral          | -36.7             | -21.0 (1.5) | -36.5 (1.9) | -38.5 (1.7) |
|                                  | COO <sup>-</sup> | -29.3             | -38.6 (1.9) | -32.6 (1.8) | -39.3 (1.6) |
|                                  | ArO <sup>-</sup> | -34.5             | -38.5 (1.8) | -33.8 (2.0) | -38.5 (1.7) |
|                                  | Dianionic        | -29.0             | -32.7 (1.7) | -30.5 (1.8) | -38.6 (1.7) |
| G <sup>3</sup><br>(Wedge)        | Neutral          | -32.2             | -36.6 (1.8) | -33.8 (2.5) | -38.1 (1.7) |
|                                  | COO <sup>-</sup> | -38.4             | -31.7 (1.9) | -30.6 (1.7) | -38.1 (1.6) |
|                                  | ArO <sup>-</sup> | -31.1             | -36.4 (1.7) | -31.1 (1.8) | -37.6 (1.8) |
|                                  | Dianionic        | -31.4             | -29.2 (2.3) | -30.1 (1.6) | -36.9 (1.5) |
| G <sup>1</sup><br>(Stacked)      | Neutral          | -38.0             | -33.8 (1.4) | -35.8 (1.5) | -38.5 (1.4) |
|                                  | COO <sup>-</sup> | -37.2             | -35.3 (1.4) | -37.1 (1.5) | -36.6 (1.5) |
|                                  | ArO <sup>-</sup> | -34.2             | -31.3 (2.1) | -33.0 (1.7) | -31.8 (1.9) |
|                                  | Dianionic        | -36.2             | -35.1 (1.5) | -36.3 (1.4) | -36.6 (1.4) |
| G <sup>2</sup><br>(Stacked)      | Neutral          | -33.1             | -33.6 (1.7) | -35.1 (1.8) | -34.2 (1.8) |
|                                  | COO <sup>-</sup> | -33.6             | -34.0 (1.7) | -35.0 (1.9) | -35.1 (2.0) |
|                                  | ArO <sup>-</sup> | -32.9             | -33.4 (1.7) | -33.5 (1.6) | –           |
|                                  | Dianionic        | -32.3             | -32.0 (1.6) | -32.6 (1.9) | -30.9 (1.9) |
| G <sup>3</sup><br>(Stacked)      | Neutral          | -35.7             | -34.9 (1.6) | -34.2 (1.7) | -35.4 (1.5) |
|                                  | COO <sup>-</sup> | -35.4             | -34.5 (1.9) | -35.7 (1.5) | -35.1 (1.6) |
|                                  | ArO <sup>-</sup> | -34.3             | -36.3 (1.5) | -34.1 (1.7) | -34.8 (1.6) |
|                                  | Dianionic        | -33.4             | -33.2 (1.8) | -31.9 (1.9) | –           |

<sup>a</sup>Data for C match has been taken from reference 19 of the manuscript.

**Table S9.** Average values and standard deviations (in parentheses) for lesion-site pseudostep parameters<sup>a</sup> and minor groove dimension for DNA containing the OT-G adduct paired against A.

| Position (Conformer)             | Ionization State | Shift (Å)  | Slide (Å)  | Rise (Å)  | Tilt (°)   | Roll (°)    | Twist (°)  | Minor Groove (Å) |
|----------------------------------|------------------|------------|------------|-----------|------------|-------------|------------|------------------|
| G <sup>1</sup><br>(Major Groove) | Neutral          | −0.3 (0.7) | −1.4 (0.8) | 6.2 (0.4) | 3.0 (4.8)  | 8.6 (6.6)   | 54.3 (5.4) | 7.9 (1.1)        |
|                                  | COO <sup>−</sup> | 0.1 (0.8)  | −1.9 (0.8) | 6.3 (0.4) | 3.9 (4.9)  | 9.2 (7.2)   | 51.2 (6.2) | 8.2 (1.2)        |
|                                  | ArO <sup>−</sup> | −0.2 (0.8) | −2.0 (1.0) | 6.6 (0.4) | 2.1 (5.0)  | 5.7 (7.3)   | 58.4 (5.7) | 7.2 (1.4)        |
|                                  | Dianionic        | 0.2 (0.8)  | −1.7 (0.9) | 6.4 (0.4) | 3.9 (4.8)  | 8.6 (7.0)   | 51.4 (6.0) | 8.1 (1.2)        |
| G <sup>2</sup><br>(Major Groove) | Neutral          | 0.3 (0.7)  | −1.7 (0.9) | 6.7 (0.4) | 1.6 (4.9)  | 3.3 (7.1)   | 62.4 (6.9) | 6.3 (1.7)        |
|                                  | COO <sup>−</sup> | 0.7 (0.7)  | −2.3 (0.7) | 6.7 (0.3) | 3.1 (4.7)  | 5.3 (7.1)   | 57.3 (5.4) | 6.9 (1.5)        |
|                                  | ArO <sup>−</sup> | 0.5 (0.8)  | −2.0 (0.8) | 6.6 (0.3) | 2.3 (4.9)  | 5.6 (7.4)   | 57.2 (5.8) | 7.2 (1.4)        |
|                                  | Dianionic        | 1.2 (0.7)  | −2.3 (0.7) | 6.7 (0.4) | 3.0 (4.8)  | 10.0 (7.6)  | 52.0 (6.3) | 7.6 (1.8)        |
| G <sup>3</sup><br>(Major Groove) | Neutral          | −0.1 (0.9) | −2.6 (0.7) | 6.8 (0.4) | 5.2 (4.8)  | 3.3 (7.9)   | 62.4 (4.3) | 5.9 (1.6)        |
|                                  | COO <sup>−</sup> | 0.0 (0.7)  | −1.4 (1.0) | 6.3 (0.4) | 6.2 (4.9)  | 3.7 (7.0)   | 54.4 (6.9) | 7.7 (1.4)        |
|                                  | ArO <sup>−</sup> | −0.2 (0.9) | −2.1 (1.0) | 6.7 (0.5) | 4.2 (4.9)  | 2.1 (7.9)   | 57.9 (6.1) | 6.5 (1.7)        |
|                                  | Dianionic        | 0.1 (0.7)  | −1.6 (0.8) | 6.4 (0.4) | 5.4 (4.9)  | 4.5 (6.5)   | 54.6 (6.8) | 7.6 (1.5)        |
| G <sup>1</sup><br>(Wedge)        | Neutral          | 0.6 (0.8)  | −2.7 (0.6) | 6.6 (0.4) | 1.6 (5.1)  | 22.6 (9.2)  | 50.4 (5.6) | 9.3 (1.4)        |
|                                  | COO <sup>−</sup> | 1.6 (0.7)  | −1.4 (0.5) | 6.1 (0.5) | 11.9 (6.3) | 13.3 (7.0)  | 67.2 (4.8) | 7.7 (0.9)        |
|                                  | ArO <sup>−</sup> | 1.6 (0.8)  | −1.4 (0.5) | 6.5 (0.5) | 13.4 (7.0) | 14.2 (8.1)  | 70.1 (6.6) | 7.4 (1.1)        |
|                                  | Dianionic        | 0.4 (0.7)  | −2.9 (0.6) | 6.6 (0.4) | 0.1 (4.9)  | 20.3 (7.8)  | 49.3 (5.4) | 9.3 (1.1)        |
| G <sup>2</sup><br>(Wedge)        | Neutral          | 1.0 (1.1)  | −2.1 (1.0) | 7.0 (0.5) | 0.2 (5.1)  | 29.9 (16.4) | 59.2 (7.0) | 10.7 (2.3)       |
|                                  | COO <sup>−</sup> | 0.8 (1.1)  | −1.7 (0.9) | 6.9 (0.4) | 0.1 (5.2)  | 20.4 (8.4)  | 60.3 (5.3) | 9.7 (1.5)        |
|                                  | ArO <sup>−</sup> | 1.5 (1.3)  | −1.9 (1.0) | 6.8 (0.4) | 1.3 (5.6)  | 16.4 (7.7)  | 61.7 (6.6) | 9.3 (1.4)        |
|                                  | Dianionic        | 0.3 (0.9)  | −2.0 (0.7) | 7.0 (0.4) | −0.4 (5.0) | 19.0 (7.6)  | 60.5 (4.7) | 9.6 (1.6)        |
| G <sup>3</sup><br>(Wedge)        | Neutral          | 0.3 (0.9)  | −2.8 (0.9) | 6.8 (0.5) | 1.7 (6.0)  | 14.8 (6.6)  | 59.9 (6.4) | 7.9 (1.0)        |
|                                  | COO <sup>−</sup> | 0.5 (0.8)  | −1.8 (0.8) | 6.3 (0.4) | 1.3 (5.1)  | 15.2 (6.1)  | 59.1 (6.6) | 7.9 (1.3)        |
|                                  | ArO <sup>−</sup> | 0.0 (1.0)  | −2.7 (0.6) | 6.7 (0.4) | 0.8 (5.0)  | 19.9 (8.7)  | 55.0 (4.7) | 9.6 (1.2)        |
|                                  | Dianionic        | −0.7 (0.9) | −1.3 (1.0) | 6.4 (0.5) | 1.0 (5.5)  | 20.0 (10.9) | 52.8 (6.1) | 9.6 (1.5)        |
| G <sup>1</sup><br>(Stacked)      | Neutral          | 0.8 (0.6)  | −0.4 (0.6) | 7.0 (0.3) | −1.3 (4.3) | 13.4 (5.4)  | 21.8 (7.2) | 11.8 (1.3)       |
|                                  | COO <sup>−</sup> | 0.8 (0.6)  | −0.6 (0.6) | 7.0 (0.3) | −0.3 (4.4) | 14.2 (5.3)  | 25.6 (6.6) | 11.4 (1.1)       |
|                                  | ArO <sup>−</sup> | 0.0 (0.7)  | −0.5 (0.9) | 7.3 (0.4) | −3.1 (5.0) | 14.4 (6.5)  | 29.6 (6.1) | 12.2 (0.8)       |

|                             |                  |            |            |           |            |            |            |            |
|-----------------------------|------------------|------------|------------|-----------|------------|------------|------------|------------|
|                             | Dianionic        | 1.4 (0.7)  | −0.5 (0.7) | 7.3 (0.3) | 6.5 (5.6)  | 15.5 (5.9) | 46.9 (7.0) | 10.6 (1.0) |
| G <sup>2</sup><br>(Stacked) | Neutral          | −0.5 (0.6) | 1.2 (0.7)  | 6.6 (0.4) | −2.8 (5.2) | 9.6 (5.0)  | 43.2 (4.5) | 10.6 (1.3) |
|                             | COO <sup>−</sup> | −0.6 (0.7) | 1.1 (0.6)  | 6.8 (0.4) | −2.7 (4.9) | 10.0 (6.5) | 36.5 (5.9) | 12.4 (1.1) |
|                             | ArO <sup>−</sup> | −0.5 (0.6) | 1.1 (0.7)  | 6.6 (0.4) | −2.0 (5.3) | 11.3 (6.8) | 41.3 (5.2) | 11.8 (1.1) |
|                             | Dianionic        | −0.7 (0.7) | 1.1 (0.6)  | 6.7 (0.4) | −3.4 (5.0) | 12.2 (5.8) | 35.6 (5.7) | 12.3 (1.1) |
| G <sup>3</sup><br>(Stacked) | Neutral          | 1.2 (0.6)  | −3.1 (0.9) | 7.1 (0.3) | 4.4 (5.3)  | 13.1 (6.2) | 60.4 (7.0) | 7.4 (0.8)  |
|                             | COO <sup>−</sup> | 1.0 (0.7)  | −3.6 (1.0) | 7.1 (0.4) | 1.5 (6.7)  | 13.5 (6.0) | 57.4 (8.3) | 7.7 (0.9)  |
|                             | ArO <sup>−</sup> | 1.1 (0.5)  | 0.3 (0.8)  | 7.3 (0.4) | 8.0 (5.2)  | 11.9 (5.0) | 54.7 (5.5) | 9.5 (1.2)  |
|                             | Dianionic        | 1.2 (0.7)  | −3.3 (0.9) | 7.3 (0.4) | 2.9 (5.0)  | 10.8 (7.4) | 60.5 (6.7) | 8.0 (0.9)  |

<sup>a</sup>Pseudostep parameters at the lesion site were calculated using a base-step consisting of the 5'– and 3'–base pairs with respect to the OT-G adduct.

**Table S10.** Average values and standard deviations (in parentheses) for lesion-site pseudostep parameters<sup>a</sup> and minor groove dimension for DNA containing the OT-G adduct paired against T.

| Position (Conformer)             | Ionization State | Shift (Å)  | Slide (Å)  | Rise (Å)  | Tilt (°)   | Roll (°)   | Twist (°)  | Minor Groove (Å) |
|----------------------------------|------------------|------------|------------|-----------|------------|------------|------------|------------------|
| G <sup>1</sup><br>(Major Groove) | Neutral          | 0.2 (0.7)  | −2.1 (0.7) | 6.7 (0.4) | 3.8 (5.3)  | 21.1 (7.8) | 57.9 (6.2) | 8.3 (1.1)        |
|                                  | COO <sup>−</sup> | −0.1 (0.7) | −1.8 (0.6) | 6.1 (0.4) | 3.6 (4.9)  | 8.9 (7.6)  | 51.7 (6.0) | 8.0 (1.4)        |
|                                  | ArO <sup>−</sup> | −1.0 (0.8) | −3.4 (0.8) | 7.1 (0.6) | 0.9 (5.7)  | 2.7 (7.9)  | 61.1 (6.4) | 6.1 (1.4)        |
|                                  | Dianionic        | −0.1 (0.7) | −1.7 (0.7) | 6.1 (0.4) | 2.9 (5.1)  | 10.5 (7.3) | 48.5 (6.8) | 8.7 (1.3)        |
| G <sup>2</sup><br>(Major Groove) | Neutral          | 0.0 (0.7)  | −2.8 (0.7) | 6.7 (0.3) | 1.3 (4.8)  | 4.9 (6.2)  | 61.9 (4.7) | 7.1 (1.5)        |
|                                  | COO <sup>−</sup> | 0.9 (0.8)  | −2.1 (0.7) | 6.5 (0.3) | 1.6 (4.9)  | 2.4 (7.3)  | 58.0 (5.5) | 7.4 (1.6)        |
|                                  | ArO <sup>−</sup> | −0.7 (0.6) | −3.4 (0.7) | 6.7 (0.3) | 2.4 (4.6)  | 1.8 (6.1)  | 61.4 (4.4) | 7.0 (1.3)        |
|                                  | Dianionic        | 1.2 (0.7)  | −2.2 (0.6) | 6.5 (0.3) | 1.4 (4.8)  | 5.5 (7.0)  | 54.2 (4.6) | 7.6 (1.4)        |
| G <sup>3</sup><br>(Major Groove) | Neutral          | −0.7 (1.0) | −3.0 (0.9) | 6.7 (0.5) | 1.0 (5.2)  | 6.0 (7.3)  | 55.8 (6.5) | 7.2 (1.6)        |
|                                  | COO <sup>−</sup> | 0.1 (0.8)  | −1.4 (0.8) | 6.1 (0.4) | 5.7 (5.0)  | 1.9 (6.7)  | 56.8 (8.3) | 7.9 (1.5)        |
|                                  | ArO <sup>−</sup> | −0.8 (0.8) | −3.2 (0.8) | 7.1 (0.5) | −0.3 (5.0) | −0.5 (7.8) | 59.2 (5.2) | 6.3 (1.4)        |
|                                  | Dianionic        | −1.3 (0.7) | −3.0 (0.8) | 7.0 (0.5) | −0.7 (4.9) | 5.2 (7.4)  | 60.5 (5.5) | 6.7 (1.5)        |
| G <sup>1</sup><br>(Wedge)        | Neutral          | 0.9 (0.8)  | −1.8 (0.7) | 6.5 (0.4) | 2.1 (5.0)  | 14.8 (7.4) | 61.1 (5.0) | 7.8 (1.0)        |
|                                  | COO <sup>−</sup> | 0.6 (0.8)  | −1.0 (0.9) | 6.4 (0.4) | −0.5 (5.3) | 12.2 (6.6) | 58.1 (5.7) | 8.4 (1.1)        |
|                                  | ArO <sup>−</sup> | 0.6 (0.8)  | −0.1 (0.8) | 6.3 (0.4) | −1.2 (5.0) | 8.8 (6.9)  | 57.7 (4.9) | 9.2 (0.9)        |
|                                  | Dianionic        | 0.3 (0.8)  | −0.5 (0.9) | 6.4 (0.4) | −1.4 (5.1) | 12.2 (6.8) | 56.8 (5.4) | 9.2 (1.0)        |
| G <sup>2</sup><br>(Wedge)        | Neutral          | Base       | pair       | broken    |            |            |            | 8.5 (1.2)        |
|                                  | COO <sup>−</sup> | −0.2 (0.6) | 0.7 (0.9)  | 5.8 (0.4) | −0.6 (6.0) | −1.5 (7.3) | 70.3 (6.4) | 6.6 (1.7)        |
|                                  | ArO <sup>−</sup> | −0.2 (0.8) | −2.2 (0.8) | 7.0 (0.4) | −2.5 (5.1) | 9.6 (6.5)  | 57.2 (5.9) | 9.1 (1.2)        |
|                                  | Dianionic        | 0.0 (1.0)  | 0.3 (1.1)  | 6.3 (0.4) | 2.5 (6.6)  | 8.1 (7.4)  | 64.4 (6.3) | 9.8 (1.2)        |
| G <sup>3</sup><br>(Wedge)        | Neutral          | 0.9 (0.9)  | −1.0 (1.1) | 6.3 (0.4) | 4.0 (4.7)  | 10.7 (6.5) | 62.6 (4.5) | 7.9 (1.2)        |
|                                  | COO <sup>−</sup> | 0.0 (0.8)  | −0.4 (0.8) | 6.1 (0.3) | 2.7 (5.0)  | 10.1 (6.7) | 58.2 (5.9) | 9.0 (0.9)        |
|                                  | ArO <sup>−</sup> | 0.2 (1.0)  | −0.1 (0.9) | 6.2 (0.4) | 2.2 (4.8)  | 9.6 (6.8)  | 60.1 (5.2) | 9.0 (0.9)        |
|                                  | Dianionic        | −0.4 (0.8) | −0.5 (0.8) | 6.2 (0.3) | 2.3 (5.0)  | 12.2 (6.8) | 58.2 (5.3) | 9.4 (0.9)        |
| G <sup>1</sup><br>(stacked)      | Neutral          | 1.7 (0.9)  | −1.3 (0.7) | 7.4 (0.4) | 11.9 (5.6) | 18.0 (6.2) | 61.0 (5.5) | 9.0 (1.1)        |
|                                  | COO <sup>−</sup> | 0.8 (0.6)  | −1.1 (0.6) | 7.2 (0.3) | 4.2 (5.0)  | 16.7 (5.4) | 39.0 (5.5) | 10.3 (1.0)       |
|                                  | ArO <sup>−</sup> | 0.4 (0.8)  | −1.5 (0.7) | 7.3 (0.4) | 2.3 (5.2)  | 11.5 (6.1) | 41.1 (7.1) | 10.8 (1.0)       |

|                             |                  |            |            |           |            |            |            |            |
|-----------------------------|------------------|------------|------------|-----------|------------|------------|------------|------------|
|                             | Dianionic        | 1.4 (0.6)  | 0.2 (0.7)  | 7.3 (0.3) | 6.3 (5.2)  | 10.5 (5.8) | 46.3 (5.1) | 10.2 (0.9) |
| G <sup>2</sup><br>(stacked) | Neutral          | −0.1 (0.7) | 0.7 (1.5)  | 6.8 (0.4) | −2.5 (5.8) | 5.4 (6.2)  | 50.0 (7.4) | 9.5 (1.5)  |
|                             | COO <sup>−</sup> | −0.2 (0.7) | 0.9 (0.9)  | 6.9 (0.4) | −2.2 (5.6) | 7.4 (7.2)  | 43.8 (4.9) | 9.9 (1.2)  |
|                             | ArO <sup>−</sup> | −0.5 (0.6) | 1.0 (0.7)  | 6.7 (0.4) | −2.3 (5.4) | 7.0 (5.7)  | 43.7 (6.0) | 11.0 (1.3) |
|                             | Dianionic        | −0.5 (0.7) | 1.3 (0.7)  | 6.9 (0.4) | −2.4 (5.8) | 10.1 (8.4) | 39.6 (6.8) | 12.2 (1.2) |
| G <sup>3</sup><br>(stacked) | Neutral          | 1.1 (0.7)  | −2.9 (0.7) | 7.1 (0.4) | 5.6 (5.8)  | 14.9 (5.7) | 61.8 (5.7) | 7.7 (0.9)  |
|                             | COO <sup>−</sup> | 0.9 (0.7)  | −0.6 (1.6) | 7.2 (0.3) | 5.7 (4.9)  | 11.6 (6.2) | 55.8 (9.6) | 8.9 (1.6)  |
|                             | ArO <sup>−</sup> | 1.0 (0.7)  | −1.6 (1.7) | 7.3 (0.4) | 5.5 (4.9)  | 13.3 (6.1) | 58.8 (7.8) | 9.2 (1.5)  |
|                             | Dianionic        | 0.4 (1.1)  | −3.4 (0.7) | 7.7 (0.5) | 1.5 (5.8)  | 11.1 (7.4) | 61.4 (6.1) | 7.9 (0.9)  |

<sup>a</sup>Pseudostep parameters at the lesion site were calculated using a base-step consisting of the 5'– and 3'–base pairs with respect to the OT-G adduct.

**Table S11.** Average values and standard deviations (in parentheses) for lesion-site pseudostep parameters<sup>a</sup> and minor groove dimension for DNA containing the OT-G adduct paired against G.

| Position (Conformer)             | Ionization State | Shift (Å)  | Slide (Å)  | Rise (Å)  | Tilt (°)   | Roll (°)   | Twist (°)  | Minor Groove (Å) |
|----------------------------------|------------------|------------|------------|-----------|------------|------------|------------|------------------|
| G <sup>1</sup><br>(Major Groove) | Neutral          | 0.0 (0.9)  | −1.6 (1.1) | 6.4 (0.4) | 2.7 (5.0)  | 9.5 (9.4)  | 52.8 (7.1) | 7.7 (1.5)        |
|                                  | COO <sup>−</sup> | 0.4 (0.7)  | −3.1 (0.9) | 6.7 (0.5) | 3.4 (4.8)  | 5.6 (8.5)  | 51.9 (6.7) | 6.8 (1.6)        |
|                                  | ArO <sup>−</sup> | 0.4 (0.7)  | −3.6 (0.7) | 6.8 (0.5) | 3.6 (4.7)  | 5.4 (8.1)  | 50.5 (5.6) | 6.9 (1.5)        |
|                                  | Dianionic        | 1.4 (0.9)  | −0.6 (0.9) | 6.5 (0.4) | 0.7 (4.9)  | 8.0 (7.6)  | 54.2 (6.3) | 8.2 (1.2)        |
| G <sup>2</sup><br>(Major Groove) | Neutral          | 0.2 (0.7)  | −3.0 (0.7) | 6.7 (0.3) | 3.2 (4.8)  | 5.4 (7.2)  | 59.4 (4.2) | 6.9 (1.3)        |
|                                  | COO <sup>−</sup> | 0.6 (0.6)  | −2.0 (0.8) | 6.6 (0.3) | 2.4 (4.9)  | 6.1 (6.5)  | 59.0 (5.4) | 7.0 (1.4)        |
|                                  | ArO <sup>−</sup> | 0.2 (0.7)  | −2.9 (0.8) | 6.7 (0.3) | 2.9 (4.7)  | 5.0 (6.6)  | 60.1 (4.2) | 6.9 (1.3)        |
|                                  | Dianionic        | 0.9 (0.6)  | −1.3 (0.9) | 6.8 (0.4) | 0.5 (4.8)  | 17.4 (6.7) | 38.9 (6.4) | 11.3 (1.6)       |
| G <sup>3</sup><br>(Major Groove) | Neutral          | −0.2 (0.8) | −3.2 (1.3) | 6.8 (0.4) | 4.5 (4.9)  | 2.9 (6.7)  | 58.6 (6.2) | 5.9 (1.3)        |
|                                  | COO <sup>−</sup> | 1.4 (0.7)  | −0.7 (0.6) | 6.3 (0.4) | 3.8 (4.7)  | 1.4 (7.7)  | 55.2 (4.6) | 7.8 (1.4)        |
|                                  | ArO <sup>−</sup> | −0.1 (0.7) | −3.4 (0.6) | 6.9 (0.4) | 4.5 (4.8)  | 3.8 (7.8)  | 57.7 (4.1) | 6.2 (1.4)        |
|                                  | Dianionic        | 0.7 (0.9)  | −1.3 (1.0) | 6.4 (0.4) | 4.7 (4.9)  | 6.4 (7.8)  | 54.6 (7.5) | 7.6 (1.6)        |
| G <sup>1</sup><br>(Wedge)        | Neutral          | 0.9 (0.7)  | −1.7 (1.0) | 6.5 (0.4) | 2.6 (5.0)  | 14.5 (6.8) | 58.4 (7.2) | 7.9 (1.1)        |
|                                  | COO <sup>−</sup> | 0.7 (0.8)  | −1.7 (0.9) | 6.6 (0.4) | 2.3 (5.0)  | 13.9 (6.7) | 58.9 (6.2) | 7.5 (0.9)        |
|                                  | ArO <sup>−</sup> | 0.2 (0.6)  | −3.1 (0.6) | 6.6 (0.4) | −0.1 (4.7) | 20.3 (6.4) | 51.6 (4.3) | 8.8 (0.9)        |
|                                  | Dianionic        | 0.6 (0.8)  | −2.3 (0.9) | 6.5 (0.4) | 0.5 (5.1)  | 16.1 (6.8) | 51.8 (6.5) | 8.9 (1.0)        |
| G <sup>2</sup><br>(Wedge)        | Neutral          | 0.7 (0.9)  | −1.6 (0.7) | 6.7 (0.4) | 3.2 (5.2)  | 14.0 (7.6) | 60.9 (5.0) | 8.5 (1.4)        |
|                                  | COO <sup>−</sup> | 1.3 (0.6)  | −0.6 (0.7) | 6.8 (0.4) | 4.4 (5.0)  | 5.3 (6.6)  | 67.2 (5.1) | 6.5 (1.2)        |
|                                  | ArO <sup>−</sup> | 0.4 (0.8)  | −2.1 (0.7) | 6.8 (0.4) | 1.4 (4.7)  | 13.3 (6.7) | 59.0 (4.7) | 8.8 (1.1)        |
|                                  | Dianionic        | 0.0 (1.1)  | −1.6 (1.0) | 6.7 (0.4) | −0.8 (5.2) | 9.7 (5.5)  | 57.5 (4.9) | 8.7 (1.1)        |
| G <sup>3</sup><br>(Wedge)        | Neutral          | 0.6 (0.8)  | −2.0 (0.7) | 6.4 (0.4) | 4.9 (4.7)  | 14.1 (6.1) | 58.5 (5.4) | 7.7 (1.0)        |
|                                  | COO <sup>−</sup> | 0.3 (0.8)  | −2.3 (0.7) | 6.5 (0.4) | 3.6 (4.7)  | 15.8 (6.1) | 57.1 (5.0) | 8.2 (1.0)        |
|                                  | ArO <sup>−</sup> | 0.2 (0.9)  | −2.4 (0.7) | 6.5 (0.4) | 2.9 (4.9)  | 15.2 (8.5) | 55.3 (5.2) | 8.6 (1.5)        |
|                                  | Dianionic        | 0.3 (0.7)  | −2.6 (0.6) | 6.5 (0.4) | 3.0 (4.7)  | 16.2 (5.3) | 54.9 (4.9) | 8.8 (0.8)        |
| G <sup>1</sup><br>(Stacked)      | Neutral          | 0.7 (0.6)  | −0.2 (0.6) | 6.9 (0.3) | −2.3 (4.3) | 13.1 (5.1) | 17.5 (4.9) | 10.1 (1.5)       |
|                                  | COO <sup>−</sup> | 1.4 (0.7)  | −0.2 (0.9) | 7.3 (0.4) | 7.6 (6.2)  | 11.6 (6.4) | 48.5 (8.5) | 7.5 (1.4)        |
|                                  | ArO <sup>−</sup> | −0.1 (0.8) | −1.1 (0.8) | 7.1 (0.4) | −0.5 (5.1) | 13.8 (6.3) | 39.4 (7.7) | 11.0 (1.0)       |

|                             |                  |            |            |           |            |            |             |            |
|-----------------------------|------------------|------------|------------|-----------|------------|------------|-------------|------------|
|                             | Dianionic        | 1.4 (0.6)  | 0.2 (0.6)  | 7.3 (0.3) | 6.5 (4.8)  | 9.4 (5.9)  | 42.9 (5.0)  | 10.2 (0.8) |
| G <sup>2</sup><br>(Stacked) | Neutral          | 0.6 (0.9)  | −0.4 (1.6) | 7.1 (0.4) | 5.5 (6.7)  | 3.1 (6.3)  | 57.0 (10.5) | 9.2 (1.7)  |
|                             | COO <sup>−</sup> | 0.1 (0.9)  | 1.6 (1.0)  | 6.8 (0.4) | −1.0 (5.6) | 12.1 (8.0) | 34.9 (11.4) | 12.7 (1.8) |
|                             | ArO <sup>−</sup> | –          | –          | –         | –          | –          | –           | –          |
|                             | Dianionic        | −1.5 (0.7) | 0.9 (0.6)  | 6.9 (0.4) | −1.8 (4.8) | 21.0 (7.3) | 26.4 (5.2)  | 13.9 (1.3) |
| G <sup>3</sup><br>(Stacked) | Neutral          | 1.3 (0.6)  | −2.8 (0.6) | 7.2 (0.3) | 5.7 (4.7)  | 14.1 (5.9) | 63.8 (4.0)  | 7.5 (0.8)  |
|                             | COO <sup>−</sup> | 1.2 (0.6)  | −3.0 (0.7) | 7.2 (0.4) | 5.0 (5.1)  | 12.9 (5.6) | 63.9 (4.8)  | 7.7 (0.9)  |
|                             | ArO <sup>−</sup> | 1.3 (0.6)  | −2.5 (1.1) | 7.3 (0.4) | 6.0 (4.8)  | 13.8 (5.7) | 60.8 (7.5)  | 8.5 (1.1)  |
|                             | Dianionic        | –          | –          | –         | –          | –          | –           | –          |

<sup>a</sup>Pseudostep parameters at the lesion site were calculated using a base-step consisting of the 5'– and 3'–base pairs with respect to the OT-G adduct.



**Table S12.** Occupancies (%) of the Watson-Crick hydrogen bonds of the 3'– and 5'– base pairs flanking the lesion in the stacked conformation of DNA containing OT-G paired against A.<sup>a</sup>

| Position       | Base pair | Hydrogen bond (D–A) | Stacked conformation |                  |                  |           |
|----------------|-----------|---------------------|----------------------|------------------|------------------|-----------|
|                |           |                     | neutral              | COO <sup>–</sup> | ArO <sup>–</sup> | dianionic |
| G <sup>1</sup> | 5'C:G     | N4(C) – O6(G)       | 96.9                 | 98.4             | 98.0             | 98.6      |
|                |           | N1(G) – N3(C)       | 99.9                 | 99.9             | 99.9             | 100.0     |
|                |           | N2(G) – O2(C)       | 99.9                 | 99.7             | 99.4             | 99.5      |
|                | 3'G:C     | N4(C) – O6(G)       | 98.4                 | 99.3             | 98.9             | 99.1      |
|                |           | N1(G) – N3(C)       | 100.0                | 100.0            | 99.9             | 100.0     |
|                |           | N2(G) – O2(C)       | 100.0                | 100.0            | 99.9             | 100.0     |
| G <sup>2</sup> | 5'G:C     | N4(C) – O6(G)       | 98.0                 | 98.8             | 97.9             | 98.2      |
|                |           | N1(G) – N3(C)       | 99.8                 | 100.0            | 99.9             | 99.9      |
|                |           | N2(G) – O2(C)       | 99.8                 | 99.9             | 99.8             | 99.9      |
|                | 3'C:G     | N4(C) – O6(G)       | 98.9                 | 99.8             | 99.0             | 99.6      |
|                |           | N1(G) – N3(C)       | 100.0                | 100.0            | 100.0            | 100.0     |
|                |           | N2(G) – O2(C)       | 100.0                | 100.0            | 100.0            | 100.0     |
| G <sup>3</sup> | 5'C:G     | N4(C) – O6(G)       | 99.4                 | 99.4             | 98.6             | 98.6      |
|                |           | N1(G) – N3(C)       | 100.0                | 100.0            | 100.0            | 100.0     |
|                |           | N2(G) – O2(C)       | 99.9                 | 99.2             | 99.8             | 99.9      |
|                | 3'C:G     | N4(C) – O6(G)       | 98.7                 | 98.3             | 98.6             | 96.4      |
|                |           | N1(G) – N3(C)       | 99.9                 | 99.9             | 99.9             | 99.6      |
|                |           | N2(G) – O2(C)       | 99.8                 | 99.8             | 100.0            | 99.1      |

<sup>a</sup>Hydrogen-bonding interactions were determined using a cut-off of 3.4 Å for the donor–acceptor distance and 120° for the donor–hydrogen–acceptor angle.

**Table S13.** Occupancies (%) of the Watson-Crick hydrogen bonds of the 3'– and 5'– base pairs flanking the lesion in the stacked conformation of DNA containing OT-G paired against T.<sup>a</sup>

| Position       | Base pair | Hydrogen bond (D–A) | Stacked conformation |                  |                  |           |
|----------------|-----------|---------------------|----------------------|------------------|------------------|-----------|
|                |           |                     | neutral              | COO <sup>–</sup> | ArO <sup>–</sup> | dianionic |
| G <sup>1</sup> | 5'C:G     | N4(C) – O6(G)       | 98.3                 | 98.9             | 98.5             | 99.0      |
|                |           | N1(G) – N3(C)       | 99.9                 | 100.0            | 99.9             | 100.0     |
|                |           | N2(G) – O2(C)       | 99.8                 | 99.6             | 99.4             | 98.4      |
|                | 3'G:C     | N4(C) – O6(G)       | 98.7                 | 99.4             | 98.0             | 98.8      |
|                |           | N1(G) – N3(C)       | 99.9                 | 100.0            | 99.9             | 100.0     |
|                |           | N2(G) – O2(C)       | 100.0                | 100.0            | 100.0            | 100.0     |
| G <sup>2</sup> | 5'G:C     | N4(C) – O6(G)       | 97.3                 | 95.6             | 94.4             | 99.7      |
|                |           | N1(G) – N3(C)       | 99.3                 | 99.8             | 99.9             | 100.0     |
|                |           | N2(G) – O2(C)       | 99.5                 | 99.7             | 99.9             | 100.0     |
|                | 3'C:G     | N4(C) – O6(G)       | 96.3                 | 99.3             | 99.2             | 96.5      |
|                |           | N1(G) – N3(C)       | 100.0                | 100.0            | 100.0            | 99.9      |
|                |           | N2(G) – O2(C)       | 99.6                 | 100.0            | 100.0            | 99.9      |
| G <sup>3</sup> | 5'C:G     | N4(C) – O6(G)       | 98.3                 | 99.2             | 99.1             | 99.4      |
|                |           | N1(G) – N3(C)       | 99.9                 | 100.0            | 100.0            | 100.0     |
|                |           | N2(G) – O2(C)       | 99.8                 | 99.8             | 99.8             | 100.0     |
|                | 3'C:G     | N4(C) – O6(G)       | 98.7                 | 99.2             | 98.9             | 98.3      |
|                |           | N1(G) – N3(C)       | 99.9                 | 100.0            | 100.0            | 99.7      |
|                |           | N2(G) – O2(C)       | 100.0                | 99.9             | 99.9             | 99.3      |

<sup>a</sup>Hydrogen-bonding interactions were determined using a cut-off of 3.4 Å for the donor–acceptor distance and 120° for the donor–hydrogen–acceptor angle.

**Table S14.** Occupancies (%) of the Watson-Crick hydrogen bonds of the 3'– and 5'– base pairs flanking the lesion in the stacked conformation of DNA containing OT-G paired against G.<sup>a</sup>

| Position       | Base pair | Hydrogen bond (D–A) | Stacked conformation |                  |                  |           |
|----------------|-----------|---------------------|----------------------|------------------|------------------|-----------|
|                |           |                     | neutral              | COO <sup>–</sup> | ArO <sup>–</sup> | dianionic |
| G <sup>1</sup> | 5'C:G     | N4(C) – O6(G)       | 96.1                 | 99.3             | 98.9             | 98.8      |
|                |           | N1(G) – N3(C)       | 99.6                 | 100.0            | 100.0            | 100.0     |
|                |           | N2(G) – O2(C)       | 99.9                 | 99.3             | 99.2             | 99.1      |
|                | 3'G:C     | N4(C) – O6(G)       | 98.7                 | 98.3             | 98.2             | 99.3      |
|                |           | N1(G) – N3(C)       | 100.0                | 99.8             | 99.6             | 100.0     |
|                |           | N2(G) – O2(C)       | 100.0                | 100.0            | 100.0            | 99.9      |
| G <sup>2</sup> | 5'G:C     | N4(C) – O6(G)       | 96.8                 | 98.9             | 95.3             | 98.3      |
|                |           | N1(G) – N3(C)       | 99.9                 | 100.0            | 99.9             | 99.9      |
|                |           | N2(G) – O2(C)       | 99.8                 | 99.8             | 99.8             | 99.9      |
|                | 3'C:G     | N4(C) – O6(G)       | 99.3                 | 98.9             | 99.3             | 99.8      |
|                |           | N1(G) – N3(C)       | 100.0                | 100.0            | 99.9             | 100.0     |
|                |           | N2(G) – O2(C)       | 99.9                 | 99.8             | 99.9             | 99.9      |
| G <sup>3</sup> | 5'C:G     | N4(C) – O6(G)       | 99.6                 | 99.7             | 99.4             | 99.3      |
|                |           | N1(G) – N3(C)       | 100.0                | 100.0            | 100.0            | 100.0     |
|                |           | N2(G) – O2(C)       | 99.9                 | 99.9             | 99.9             | 99.8      |
|                | 3'C:G     | N4(C) – O6(G)       | 99.6                 | 99.0             | 98.1             | 97.1      |
|                |           | N1(G) – N3(C)       | 100.0                | 100.0            | 99.8             | 99.8      |
|                |           | N2(G) – O2(C)       | 99.8                 | 99.9             | 99.9             | 99.7      |

<sup>a</sup>Hydrogen-bonding interactions were determined using a cut-off of 3.4 Å for the donor–acceptor distance and 120° for the donor–hydrogen–acceptor angle.

**Table S15.** Relative MM-PBSA free energies (kcal mol<sup>-1</sup>) for different conformations of DNA containing OT-G paired against A, T or G.

| Position       | Ionization State | Conformation | A    | T    | G    |
|----------------|------------------|--------------|------|------|------|
| G <sup>1</sup> | Neutral          | Major Groove | 0.0  | 10.2 | 9.4  |
|                |                  | Wedge        | 7.2  | 1.2  | 0.0  |
|                |                  | Stacked      | 2.4  | 0.0  | 6.5  |
| G <sup>2</sup> |                  | Major Groove | 2.6  | 0.0  | 4.7  |
|                |                  | Wedge        | 2.4  | 7.9  | 0.0  |
|                |                  | Stacked      | 0.0  | 6.7  | 1.8  |
| G <sup>3</sup> |                  | Major Groove | 3.9  | 0.0  | 13.4 |
|                |                  | Wedge        | 1.3  | 3.0  | 0.0  |
|                |                  | Stacked      | 0.0  | 2.2  | 4.5  |
| G <sup>1</sup> | COO <sup>-</sup> | Major Groove | 0.0  | 0.0  | 15.2 |
|                |                  | Wedge        | 13.8 | 2.3  | 0.0  |
|                |                  | Stacked      | 6.1  | 4.8  | 10.9 |
| G <sup>2</sup> |                  | Major Groove | 0.0  | 0.0  | 14.7 |
|                |                  | Wedge        | 5.5  | 14.3 | 0.0  |
|                |                  | Stacked      | 0.1  | 7.4  | 19.6 |
| G <sup>3</sup> |                  | Major Groove | 2.7  | 0.0  | 10.7 |
|                |                  | Wedge        | 0.0  | 1.1  | 0.0  |
|                |                  | Stacked      | 0.6  | 4.9  | 9.0  |
| G <sup>1</sup> | ArO <sup>-</sup> | Major Groove | 0.0  | 0.0  | 12.3 |
|                |                  | Wedge        | 8.5  | 1.5  | 0.0  |
|                |                  | Stacked      | 6.8  | 7.2  | 14.0 |
| G <sup>2</sup> |                  | Major Groove | 3.2  | 0.0  | 12.4 |
|                |                  | Wedge        | 5.9  | 7.4  | 0.0  |
|                |                  | Stacked      | 0.0  | 10.8 | –    |
| G <sup>3</sup> |                  | Major Groove | 0.0  | 0.0  | 10.5 |
|                |                  | Wedge        | 4.6  | 3.8  | 0.0  |
|                |                  | Stacked      | 11.0 | 8.0  | 20.5 |
| G <sup>1</sup> | Dianionic        | Major Groove | 0.0  | 0.0  | 7.2  |
|                |                  | Wedge        | 9.4  | 1.1  | 0.0  |
|                |                  | Stacked      | 8.1  | 8.9  | 21.5 |
| G <sup>2</sup> |                  | Major Groove | 0.0  | 0.0  | 9.3  |
|                |                  | Wedge        | 10.6 | 0.3  | 0.0  |
|                |                  | Stacked      | 6.3  | 7.6  | 11.1 |
| G <sup>3</sup> |                  | Major Groove | 0.0  | 4.9  | 14.9 |
|                |                  | Wedge        | 4.1  | 0.0  | 0.0  |
|                |                  | Stacked      | 11.3 | 10.6 | –    |

**Table S16.** Hydrogen-bond occupancies (%) for the terminal G:C base pairs over the last 10 ns of the production simulation for each DNA duplex with OT-G paired against A.<sup>a</sup>

| Position       | Ionization State | Conformation | 5'-G:C <sup>b</sup> |           | 3'-G:C <sup>b</sup> |           |
|----------------|------------------|--------------|---------------------|-----------|---------------------|-----------|
|                |                  |              | Hydrogen bond (D-A) | Occupancy | Hydrogen bond (D-A) | Occupancy |
| G <sup>1</sup> | Neutral          | Major Groove | N4(C)-O6(G)         | 93.8      | N4(C)-O6(G)         | 97.3      |
|                |                  |              | N1(G)-N3(C)         | 99.7      | N1(G)-N3(C)         | 99.6      |
|                |                  |              | N2(G)-O2(C)         | 99.2      | N2(G)-O2(C)         | 99.7      |
|                |                  | Wedge        | N4(C)-O6(G)         | 97.7      | N4(C)-O6(G)         | 96.8      |
|                |                  |              | N1(G)-N3(C)         | 99.9      | N1(G)-N3(C)         | 99.0      |
|                |                  |              | N2(G)-O2(C)         | 99.5      | N2(G)-O2(C)         | 99.0      |
|                |                  | Stacked      | N4(C)-O6(G)         | 97.7      | N4(C)-O6(G)         | 97.8      |
|                |                  |              | N1(G)-N3(C)         | 99.4      | N1(G)-N3(C)         | 99.8      |
|                |                  |              | N2(G)-O2(C)         | 99.1      | N2(G)-O2(C)         | 99.7      |
|                | COO <sup>-</sup> | Major Groove | N4(C)-O6(G)         | 91.4      | N4(C)-O6(G)         | 97.5      |
|                |                  |              | N1(G)-N3(C)         | 99.3      | N1(G)-N3(C)         | 99.7      |
|                |                  |              | N2(G)-O2(C)         | 97.9      | N2(G)-O2(C)         | 99.7      |
|                |                  | Wedge        | N4(C)-O6(G)         | 96.6      | N4(C)-O6(G)         | 92.3      |
|                |                  |              | N1(G)-N3(C)         | 99.8      | N1(G)-N3(C)         | 94.8      |
|                |                  |              | N2(G)-O2(C)         | 99.2      | N2(G)-O2(C)         | 98.7      |
|                |                  | Stacked      | N4(C)-O6(G)         | 97.3      | N4(C)-O6(G)         | 97.2      |
|                |                  |              | N1(G)-N3(C)         | 99.9      | N1(G)-N3(C)         | 99.5      |
|                |                  |              | N2(G)-O2(C)         | 99.5      | N2(G)-O2(C)         | 99.6      |
|                | ArO <sup>-</sup> | Major Groove | N4(C)-O6(G)         | 94.3      | N4(C)-O6(G)         | 97.6      |
|                |                  |              | N1(G)-N3(C)         | 99.8      | N1(G)-N3(C)         | 99.8      |
|                |                  |              | N2(G)-O2(C)         | 99.4      | N2(G)-O2(C)         | 99.7      |
|                |                  | Wedge        | N4(C)-O6(G)         | 96.4      | N4(C)-O6(G)         | 97.6      |
|                |                  |              | N1(G)-N3(C)         | 99.2      | N1(G)-N3(C)         | 99.6      |
|                |                  |              | N2(G)-O2(C)         | 99.4      | N2(G)-O2(C)         | 99.7      |
|                |                  | Stacked      | N4(C)-O6(G)         | 97.5      | N4(C)-O6(G)         | 97.9      |
|                |                  |              | N1(G)-N3(C)         | 99.9      | N1(G)-N3(C)         | 99.6      |
|                |                  |              | N2(G)-O2(C)         | 99.7      | N2(G)-O2(C)         | 99.6      |
|                | Dianionic        | Major Groove | N4(C)-O6(G)         | 93.3      | N4(C)-O6(G)         | 97.6      |
|                |                  |              | N1(G)-N3(C)         | 99.8      | N1(G)-N3(C)         | 99.5      |
|                |                  |              | N2(G)-O2(C)         | 99.1      | N2(G)-O2(C)         | 99.6      |
|                |                  | Wedge        | N4(C)-O6(G)         | 96.9      | N4(C)-O6(G)         | 97.9      |
|                |                  |              | N1(G)-N3(C)         | 99.9      | N1(G)-N3(C)         | 99.7      |
|                |                  |              | N2(G)-O2(C)         | 99.6      | N2(G)-O2(C)         | 99.6      |
|                |                  | Stacked      | N4(C)-O6(G)         | 97.1      | N4(C)-O6(G)         | 97.3      |
|                |                  |              | N1(G)-N3(C)         | 99.8      | N1(G)-N3(C)         | 99.2      |
|                |                  |              | N2(G)-O2(C)         | 99.6      | N2(G)-O2(C)         | 99.5      |
| G <sup>2</sup> | Neutral          | Major Groove | N4(C)-O6(G)         | 94.9      | N4(C)-O6(G)         | 95.6      |
|                |                  |              | N1(G)-N3(C)         | 95.5      | N1(G)-N3(C)         | 97.6      |
|                |                  |              | N2(G)-O2(C)         | 94.6      | N2(G)-O2(C)         | 98.9      |
|                |                  | Wedge        | N4(C)-O6(G)         | 95.0      | N4(C)-O6(G)         | 86.6      |
|                |                  |              | N1(G)-N3(C)         | 99.8      | N1(G)-N3(C)         | 88.1      |
|                |                  |              | N2(G)-O2(C)         | 99.2      | N2(G)-O2(C)         | 88.0      |
|                |                  | Stacked      | N4(C)-O6(G)         | 94.3      | N4(C)-O6(G)         | 97.7      |

|                |                  |              |             |       |             |      |
|----------------|------------------|--------------|-------------|-------|-------------|------|
|                | COO <sup>-</sup> | Major Groove | N1(G)–N3(C) | 98.5  | N1(G)–N3(C) | 99.6 |
|                |                  |              | N2(G)–O2(C) | 98.1  | N2(G)–O2(C) | 99.6 |
|                |                  |              | N4(C)–O6(G) | 95.5  | N4(C)–O6(G) | 97.5 |
|                |                  | Wedge        | N1(G)–N3(C) | 99.9  | N1(G)–N3(C) | 99.8 |
|                |                  |              | N2(G)–O2(C) | 99.1  | N2(G)–O2(C) | 99.6 |
|                |                  |              | N4(C)–O6(G) | 95.2  | N4(C)–O6(G) | 97.2 |
|                |                  | Stacked      | N1(G)–N3(C) | 99.7  | N1(G)–N3(C) | 99.7 |
|                |                  |              | N2(G)–O2(C) | 99.0  | N2(G)–O2(C) | 99.6 |
|                |                  |              | N4(C)–O6(G) | 96.0  | N4(C)–O6(G) | 83.6 |
|                | ArO <sup>-</sup> | Major Groove | N1(G)–N3(C) | 100.0 | N1(G)–N3(C) | 85.7 |
|                |                  |              | N2(G)–O2(C) | 99.3  | N2(G)–O2(C) | 87.8 |
|                |                  |              | N4(C)–O6(G) | 95.2  | N4(C)–O6(G) | 97.7 |
|                |                  | Wedge        | N1(G)–N3(C) | 99.8  | N1(G)–N3(C) | 99.8 |
|                |                  |              | N2(G)–O2(C) | 99.2  | N2(G)–O2(C) | 99.1 |
|                |                  |              | N4(C)–O6(G) | 95.7  | N4(C)–O6(G) | 97.8 |
|                |                  | Stacked      | N1(G)–N3(C) | 99.9  | N1(G)–N3(C) | 99.7 |
|                |                  |              | N2(G)–O2(C) | 99.2  | N2(G)–O2(C) | 99.6 |
|                |                  |              | N4(C)–O6(G) | 96.2  | N4(C)–O6(G) | 97.4 |
|                | Dianionic        | Major Groove | N1(G)–N3(C) | 99.8  | N1(G)–N3(C) | 99.6 |
|                |                  |              | N2(G)–O2(C) | 99.1  | N2(G)–O2(C) | 99.7 |
|                |                  |              | N4(C)–O6(G) | 93.7  | N4(C)–O6(G) | 97.9 |
|                |                  | Wedge        | N1(G)–N3(C) | 99.9  | N1(G)–N3(C) | 99.8 |
|                |                  |              | N2(G)–O2(C) | 99.3  | N2(G)–O2(C) | 99.5 |
|                |                  |              | N4(C)–O6(G) | 93.9  | N4(C)–O6(G) | 97.8 |
|                |                  | Stacked      | N1(G)–N3(C) | 99.8  | N1(G)–N3(C) | 99.7 |
|                |                  |              | N2(G)–O2(C) | 99.1  | N2(G)–O2(C) | 99.3 |
|                |                  |              | N4(C)–O6(G) | 95.8  | N4(C)–O6(G) | 97.6 |
| G <sup>3</sup> | Neutral          | Major Groove | N1(G)–N3(C) | 99.8  | N1(G)–N3(C) | 99.6 |
|                |                  |              | N2(G)–O2(C) | 99.3  | N2(G)–O2(C) | 99.5 |
|                |                  |              | N4(C)–O6(G) | 96.0  | N4(C)–O6(G) | 97.0 |
|                |                  | Wedge        | N1(G)–N3(C) | 99.9  | N1(G)–N3(C) | 99.0 |
|                |                  |              | N2(G)–O2(C) | 99.5  | N2(G)–O2(C) | 99.7 |
|                |                  |              | N4(C)–O6(G) | 96.8  | N4(C)–O6(G) | 97.6 |
|                |                  | Stacked      | N1(G)–N3(C) | 99.9  | N1(G)–N3(C) | 99.7 |
|                |                  |              | N2(G)–O2(C) | 99.4  | N2(G)–O2(C) | 99.7 |
|                |                  |              | N4(C)–O6(G) | 95.6  | N4(C)–O6(G) | 97.5 |
|                | COO <sup>-</sup> | Major Groove | N1(G)–N3(C) | 99.9  | N1(G)–N3(C) | 99.6 |
|                |                  |              | N2(G)–O2(C) | 99.3  | N2(G)–O2(C) | 99.5 |
|                |                  |              | N4(C)–O6(G) | 95.9  | N4(C)–O6(G) | 97.0 |
|                |                  | Wedge        | N1(G)–N3(C) | 99.9  | N1(G)–N3(C) | 99.0 |
|                |                  |              | N2(G)–O2(C) | 99.5  | N2(G)–O2(C) | 99.7 |
|                |                  |              | N4(C)–O6(G) | 96.0  | N4(C)–O6(G) | 97.8 |
|                |                  | Stacked      | N1(G)–N3(C) | 99.8  | N1(G)–N3(C) | 99.7 |
|                |                  |              | N2(G)–O2(C) | 99.4  | N2(G)–O2(C) | 99.4 |
|                |                  |              | N4(C)–O6(G) | 95.4  | N4(C)–O6(G) | 97.4 |
|                | ArO <sup>-</sup> | Major Groove | N1(G)–N3(C) | 99.7  | N1(G)–N3(C) | 99.4 |
|                |                  |              | N2(G)–O2(C) | 99.3  | N2(G)–O2(C) | 99.6 |
|                |                  |              | N4(C)–O6(G) | 96.5  | N4(C)–O6(G) | 97.7 |

|  |  |              |             |      |             |      |
|--|--|--------------|-------------|------|-------------|------|
|  |  | Wedge        | N1(G)–N3(C) | 99.9 | N1(G)–N3(C) | 99.7 |
|  |  |              | N2(G)–O2(C) | 99.6 | N2(G)–O2(C) | 97.6 |
|  |  |              | N4(C)–O6(G) | 96.1 | N4(C)–O6(G) | 97.9 |
|  |  |              | N1(G)–N3(C) | 99.8 | N1(G)–N3(C) | 99.5 |
|  |  |              | N2(G)–O2(C) | 99.5 | N2(G)–O2(C) | 99.4 |
|  |  |              | N4(C)–O6(G) | 95.4 | N4(C)–O6(G) | 91.6 |
|  |  | Stacked      | N1(G)–N3(C) | 99.9 | N1(G)–N3(C) | 93.5 |
|  |  |              | N2(G)–O2(C) | 99.3 | N2(G)–O2(C) | 93.9 |
|  |  |              | N4(C)–O6(G) | 94.9 | N4(C)–O6(G) | 97.0 |
|  |  | Major Groove | N1(G)–N3(C) | 99.8 | N1(G)–N3(C) | 98.9 |
|  |  |              | N2(G)–O2(C) | 99.1 | N2(G)–O2(C) | 99.6 |
|  |  |              | N4(C)–O6(G) | 96.4 | N4(C)–O6(G) | 97.0 |
|  |  | Wedge        | N1(G)–N3(C) | 99.7 | N1(G)–N3(C) | 99.3 |
|  |  |              | N2(G)–O2(C) | 99.4 | N2(G)–O2(C) | 99.5 |
|  |  |              | N4(C)–O6(G) | 95.3 | N4(C)–O6(G) | 97.3 |
|  |  | Stacked      | N1(G)–N3(C) | 99.7 | N1(G)–N3(C) | 99.4 |
|  |  |              | N2(G)–O2(C) | 99.3 | N2(G)–O2(C) | 99.7 |
|  |  |              | N4(C)–O6(G) | 95.3 | N4(C)–O6(G) | 97.3 |

<sup>a</sup>Hydrogen-bonding interactions were determined using a cut-off of 3.4 Å for the donor–acceptor distance and 120° for the donor–hydrogen–acceptor angle. <sup>b</sup>5'– and 3'–G:C refer to the base pair at the 5' and 3' terminal ends with respect to the damaged nucleotide, respectively.

**Table S17.** Hydrogen-bond occupancies (%) for the terminal G:C base pairs over the last 10 ns of the production simulation for each DNA duplex with OT-G paired against T.<sup>a</sup>

| Position       | Ionization state | Conformation | 5'-G:C <sup>b</sup> |           | 3'-G:C <sup>b</sup> |           |
|----------------|------------------|--------------|---------------------|-----------|---------------------|-----------|
|                |                  |              | Hydrogen bond (D-A) | Occupancy | Hydrogen bond (D-A) | Occupancy |
| G <sup>1</sup> | Neutral          | Major Groove | N4(C)-O6(G)         | 97.2      | N4(C)-O6(G)         | 96.6      |
|                |                  |              | N1(G)-N3(C)         | 99.9      | N1(G)-N3(C)         | 98.9      |
|                |                  |              | N2(G)-O2(C)         | 99.2      | N2(G)-O2(C)         | 99.6      |
|                |                  | Wedge        | N4(C)-O6(G)         | 96.1      | N4(C)-O6(G)         | 97.7      |
|                |                  |              | N1(G)-N3(C)         | 99.9      | N1(G)-N3(C)         | 99.7      |
|                |                  |              | N2(G)-O2(C)         | 99.3      | N2(G)-O2(C)         | 99.7      |
|                |                  | Stacked      | N4(C)-O6(G)         | 97.6      | N4(C)-O6(G)         | 96.5      |
|                |                  |              | N1(G)-N3(C)         | 99.9      | N1(G)-N3(C)         | 98.8      |
|                |                  |              | N2(G)-O2(C)         | 99.6      | N2(G)-O2(C)         | 99.6      |
|                | COO <sup>-</sup> | Major Groove | N4(C)-O6(G)         | 91.3      | N4(C)-O6(G)         | 97.7      |
|                |                  |              | N1(G)-N3(C)         | 99.8      | N1(G)-N3(C)         | 99.7      |
|                |                  |              | N2(G)-O2(C)         | 98.9      | N2(G)-O2(C)         | 99.5      |
|                |                  | Wedge        | N4(C)-O6(G)         | 95.3      | N4(C)-O6(G)         | 96.9      |
|                |                  |              | N1(G)-N3(C)         | 99.9      | N1(G)-N3(C)         | 99.0      |
|                |                  |              | N2(G)-O2(C)         | 99.2      | N2(G)-O2(C)         | 99.5      |
|                |                  | Stacked      | N4(C)-O6(G)         | 97.5      | N4(C)-O6(G)         | 97.4      |
|                |                  |              | N1(G)-N3(C)         | 99.8      | N1(G)-N3(C)         | 99.4      |
|                |                  |              | N2(G)-O2(C)         | 99.4      | N2(G)-O2(C)         | 99.5      |
|                | ArO <sup>-</sup> | Major Groove | N4(C)-O6(G)         | 95.5      | N4(C)-O6(G)         | 97.6      |
|                |                  |              | N1(G)-N3(C)         | 99.5      | N1(G)-N3(C)         | 99.5      |
|                |                  |              | N2(G)-O2(C)         | 98.5      | N2(G)-O2(C)         | 99.4      |
|                |                  | Wedge        | N4(C)-O6(G)         | 93.6      | N4(C)-O6(G)         | 98.0      |
|                |                  |              | N1(G)-N3(C)         | 99.3      | N1(G)-N3(C)         | 99.8      |
|                |                  |              | N2(G)-O2(C)         | 98.8      | N2(G)-O2(C)         | 99.6      |
|                |                  | Stacked      | N4(C)-O6(G)         | 97.9      | N4(C)-O6(G)         | 97.9      |
|                |                  |              | N1(G)-N3(C)         | 99.9      | N1(G)-N3(C)         | 99.7      |
|                |                  |              | N2(G)-O2(C)         | 99.6      | N2(G)-O2(C)         | 99.7      |
|                | Dianionic        | Major Groove | N4(C)-O6(G)         | 89.1      | N4(C)-O6(G)         | 97.6      |
|                |                  |              | N1(G)-N3(C)         | 99.7      | N1(G)-N3(C)         | 99.6      |
|                |                  |              | N2(G)-O2(C)         | 98.3      | N2(G)-O2(C)         | 99.6      |
|                |                  | Wedge        | N4(C)-O6(G)         | 95.6      | N4(C)-O6(G)         | 97.7      |
|                |                  |              | N1(G)-N3(C)         | 99.9      | N1(G)-N3(C)         | 99.6      |
|                |                  |              | N2(G)-O2(C)         | 99.4      | N2(G)-O2(C)         | 99.5      |
|                |                  | Stacked      | N4(C)-O6(G)         | 97.5      | N4(C)-O6(G)         | 97.5      |
|                |                  |              | N1(G)-N3(C)         | 99.9      | N1(G)-N3(C)         | 99.3      |
|                |                  |              | N2(G)-O2(C)         | 99.4      | N2(G)-O2(C)         | 99.6      |
| G <sup>2</sup> | Neutral          | Major Groove | N4(C)-O6(G)         | 95.6      | N4(C)-O6(G)         | 97.3      |
|                |                  |              | N1(G)-N3(C)         | 99.9      | N1(G)-N3(C)         | 99.1      |
|                |                  |              | N2(G)-O2(C)         | 99.5      | N2(G)-O2(C)         | 99.7      |
|                |                  | Wedge        | N4(C)-O6(G)         | 94.8      | N4(C)-O6(G)         | 81.2      |
|                |                  |              | N1(G)-N3(C)         | 99.9      | N1(G)-N3(C)         | 92.2      |
|                |                  |              | N2(G)-O2(C)         | 99.2      | N2(G)-O2(C)         | 87.2      |
|                |                  | Stacked      | N4(C)-O6(G)         | 95.0      | N4(C)-O6(G)         | 95.0      |



|                |                  |              |             |       |             |      |
|----------------|------------------|--------------|-------------|-------|-------------|------|
|                | COO <sup>-</sup> | Major Groove | N1(G)–N3(C) | 99.8  | N1(G)–N3(C) | 99.8 |
|                |                  |              | N2(G)–O2(C) | 98.9  | N2(G)–O2(C) | 98.9 |
|                |                  |              | N4(C)–O6(G) | 94.0  | N4(C)–O6(G) | 87.0 |
|                |                  | Wedge        | N1(G)–N3(C) | 99.4  | N1(G)–N3(C) | 89.7 |
|                |                  |              | N2(G)–O2(C) | 98.8  | N2(G)–O2(C) | 93.7 |
|                |                  |              | N4(C)–O6(G) | 95.2  | N4(C)–O6(G) | 96.8 |
|                |                  | Stacked      | N1(G)–N3(C) | 99.7  | N1(G)–N3(C) | 98.9 |
|                |                  |              | N2(G)–O2(C) | 99.4  | N2(G)–O2(C) | 99.4 |
|                |                  |              | N4(C)–O6(G) | 95.0  | N4(C)–O6(G) | 97.3 |
|                | ArO <sup>-</sup> | Major Groove | N1(G)–N3(C) | 99.8  | N1(G)–N3(C) | 99.6 |
|                |                  |              | N2(G)–O2(C) | 98.9  | N2(G)–O2(C) | 99.7 |
|                |                  |              | N4(C)–O6(G) | 96.9  | N4(C)–O6(G) | 97.2 |
|                |                  | Wedge        | N1(G)–N3(C) | 99.8  | N1(G)–N3(C) | 99.4 |
|                |                  |              | N2(G)–O2(C) | 99.2  | N2(G)–O2(C) | 99.7 |
|                |                  |              | N4(C)–O6(G) | 95.9  | N4(C)–O6(G) | 95.7 |
|                |                  | Stacked      | N1(G)–N3(C) | 99.7  | N1(G)–N3(C) | 97.9 |
|                |                  |              | N2(G)–O2(C) | 99.3  | N2(G)–O2(C) | 99.1 |
|                |                  |              | N4(C)–O6(G) | 97.2  | N4(C)–O6(G) | 97.1 |
|                | Dianionic        | Major Groove | N1(G)–N3(C) | 99.9  | N1(G)–N3(C) | 99.3 |
|                |                  |              | N2(G)–O2(C) | 99.3  | N2(G)–O2(C) | 99.5 |
|                |                  |              | N4(C)–O6(G) | 97.2  | N4(C)–O6(G) | 97.1 |
|                |                  | Wedge        | N1(G)–N3(C) | 99.9  | N1(G)–N3(C) | 99.3 |
|                |                  |              | N2(G)–O2(C) | 99.3  | N2(G)–O2(C) | 99.5 |
|                |                  |              | N4(C)–O6(G) | 96.0  | N4(C)–O6(G) | 97.8 |
|                |                  | Stacked      | N1(G)–N3(C) | 99.9  | N1(G)–N3(C) | 99.6 |
|                |                  |              | N2(G)–O2(C) | 99.2  | N2(G)–O2(C) | 99.6 |
|                |                  |              | N4(C)–O6(G) | 95.6  | N4(C)–O6(G) | 97.5 |
| G <sup>3</sup> | Neutral          | Major Groove | N1(G)–N3(C) | 99.8  | N1(G)–N3(C) | 99.5 |
|                |                  |              | N2(G)–O2(C) | 99.2  | N2(G)–O2(C) | 99.3 |
|                |                  |              | N4(C)–O6(G) | 95.6  | N4(C)–O6(G) | 97.4 |
|                |                  | Wedge        | N1(G)–N3(C) | 99.9  | N1(G)–N3(C) | 99.5 |
|                |                  |              | N2(G)–O2(C) | 99.3  | N2(G)–O2(C) | 99.5 |
|                |                  |              | N4(C)–O6(G) | 95.4  | N4(C)–O6(G) | 97.6 |
|                |                  | Stacked      | N1(G)–N3(C) | 99.7  | N1(G)–N3(C) | 99.5 |
|                |                  |              | N2(G)–O2(C) | 99.3  | N2(G)–O2(C) | 99.5 |
|                |                  |              | N4(C)–O6(G) | 95.6  | N4(C)–O6(G) | 97.4 |
|                | COO <sup>-</sup> | Major Groove | N1(G)–N3(C) | 99.4  | N1(G)–N3(C) | 99.3 |
|                |                  |              | N2(G)–O2(C) | 99.8  | N2(G)–O2(C) | 99.4 |
|                |                  |              | N4(C)–O6(G) | 95.6  | N4(C)–O6(G) | 97.4 |
|                |                  | Wedge        | N1(G)–N3(C) | 100.0 | N1(G)–N3(C) | 98.9 |
|                |                  |              | N2(G)–O2(C) | 99.4  | N2(G)–O2(C) | 99.5 |
|                |                  |              | N4(C)–O6(G) | 95.6  | N4(C)–O6(G) | 96.7 |
|                |                  | Stacked      | N1(G)–N3(C) | 99.8  | N1(G)–N3(C) | 97.2 |
|                |                  |              | N2(G)–O2(C) | 99.3  | N2(G)–O2(C) | 99.6 |
|                |                  |              | N4(C)–O6(G) | 94.4  | N4(C)–O6(G) | 95.0 |
|                | ArO <sup>-</sup> | Major Groove | N4(C)–O6(G) | 94.9  | N4(C)–O6(G) | 98.0 |

|  |           |              |             |      |             |      |
|--|-----------|--------------|-------------|------|-------------|------|
|  |           | Wedge        | N1(G)–N3(C) | 98.8 | N1(G)–N3(C) | 99.7 |
|  |           |              | N2(G)–O2(C) | 99.4 | N2(G)–O2(C) | 99.6 |
|  |           |              | N4(C)–O6(G) | 94.0 | N4(C)–O6(G) | 98.0 |
|  |           |              | N1(G)–N3(C) | 99.4 | N1(G)–N3(C) | 99.7 |
|  |           |              | N2(G)–O2(C) | 98.8 | N2(G)–O2(C) | 99.6 |
|  |           |              | N4(C)–O6(G) | 93.5 | N4(C)–O6(G) | 97.5 |
|  |           | Stacked      | N1(G)–N3(C) | 99.4 | N1(G)–N3(C) | 99.5 |
|  |           |              | N2(G)–O2(C) | 98.3 | N2(G)–O2(C) | 99.7 |
|  |           |              | N4(C)–O6(G) | 87.9 | N4(C)–O6(G) | 98.0 |
|  | Dianionic | Major Groove | N1(G)–N3(C) | 91.0 | N1(G)–N3(C) | 99.9 |
|  |           |              | N2(G)–O2(C) | 91.2 | N2(G)–O2(C) | 99.7 |
|  |           |              | N4(C)–O6(G) | 83.9 | N4(C)–O6(G) | 97.4 |
|  |           | Wedge        | N1(G)–N3(C) | 97.4 | N1(G)–N3(C) | 99.2 |
|  |           |              | N2(G)–O2(C) | 93.7 | N2(G)–O2(C) | 99.6 |
|  |           |              | N4(C)–O6(G) | 95.2 | N4(C)–O6(G) | 97.7 |
|  |           | Stacked      | N1(G)–N3(C) | 99.1 | N1(G)–N3(C) | 99.5 |
|  |           |              | N2(G)–O2(C) | 98.5 | N2(G)–O2(C) | 99.7 |
|  |           |              | N4(C)–O6(G) |      | N4(C)–O6(G) |      |

<sup>a</sup>Hydrogen-bonding interactions were determined using a cut-off of 3.4 Å for the donor–acceptor distance and 120° for the donor–hydrogen–acceptor angle. <sup>b</sup>5′– and 3′–G:C refer to the base pair at the 5′ and 3′ terminal ends with respect to the damaged nucleotide, respectively.

**Table S18.** Hydrogen-bond occupancies (%) for the terminal G:C base pairs over the last 10 ns of the production simulation for each DNA duplex with OT-G paired against G.<sup>a</sup>

| Position       | Ionization state | Conformation | 5'-G:C <sup>b</sup> |           | 3'-G:C <sup>b</sup> |           |
|----------------|------------------|--------------|---------------------|-----------|---------------------|-----------|
|                |                  |              | Hydrogen bond (D-A) | Occupancy | Hydrogen bond (D-A) | Occupancy |
| G <sup>1</sup> | Neutral          | Major Groove | N4(C)-O6(G)         | 95.4      | N4(C)-O6(G)         | 97.0      |
|                |                  |              | N1(G)-N3(C)         | 99.8      | N1(G)-N3(C)         | 99.5      |
|                |                  |              | N2(G)-O2(C)         | 99.7      | N2(G)-O2(C)         | 99.5      |
|                |                  | Wedge        | N4(C)-O6(G)         | 96.1      | N4(C)-O6(G)         | 96.9      |
|                |                  |              | N1(G)-N3(C)         | 99.9      | N1(G)-N3(C)         | 98.9      |
|                |                  |              | N2(G)-O2(C)         | 99.5      | N2(G)-O2(C)         | 99.5      |
|                |                  | Stacked      | N4(C)-O6(G)         | 97.6      | N4(C)-O6(G)         | 97.6      |
|                |                  |              | N1(G)-N3(C)         | 99.9      | N1(G)-N3(C)         | 99.7      |
|                |                  |              | N2(G)-O2(C)         | 99.5      | N2(G)-O2(C)         | 99.6      |
|                | COO <sup>-</sup> | Major Groove | N4(C)-O6(G)         | 96.3      | N4(C)-O6(G)         | 97.8      |
|                |                  |              | N1(G)-N3(C)         | 99.7      | N1(G)-N3(C)         | 99.6      |
|                |                  |              | N2(G)-O2(C)         | 99.3      | N2(G)-O2(C)         | 99.6      |
|                |                  | Wedge        | N4(C)-O6(G)         | 88.5      | N4(C)-O6(G)         | 97.5      |
|                |                  |              | N1(G)-N3(C)         | 92.4      | N1(G)-N3(C)         | 99.4      |
|                |                  |              | N2(G)-O2(C)         | 91.4      | N2(G)-O2(C)         | 99.6      |
|                |                  | Stacked      | N4(C)-O6(G)         | 97.5      | N4(C)-O6(G)         | 97.9      |
|                |                  |              | N1(G)-N3(C)         | 99.9      | N1(G)-N3(C)         | 99.7      |
|                |                  |              | N2(G)-O2(C)         | 99.5      | N2(G)-O2(C)         | 99.7      |
|                | ArO <sup>-</sup> | Major Groove | N4(C)-O6(G)         | 97.3      | N4(C)-O6(G)         | 97.6      |
|                |                  |              | N1(G)-N3(C)         | 99.8      | N1(G)-N3(C)         | 99.6      |
|                |                  |              | N2(G)-O2(C)         | 99.5      | N2(G)-O2(C)         | 99.5      |
|                |                  | Wedge        | N4(C)-O6(G)         | 96.7      | N4(C)-O6(G)         | 97.3      |
|                |                  |              | N1(G)-N3(C)         | 99.0      | N1(G)-N3(C)         | 99.1      |
|                |                  |              | N2(G)-O2(C)         | 98.3      | N2(G)-O2(C)         | 99.5      |
|                |                  | Stacked      | N4(C)-O6(G)         | 95.2      | N4(C)-O6(G)         | 97.8      |
|                |                  |              | N1(G)-N3(C)         | 99.5      | N1(G)-N3(C)         | 99.8      |
|                |                  |              | N2(G)-O2(C)         | 97.1      | N2(G)-O2(C)         | 99.6      |
|                | Dianionic        | Major Groove | N4(C)-O6(G)         | 96.1      | N4(C)-O6(G)         | 97.8      |
|                |                  |              | N1(G)-N3(C)         | 99.8      | N1(G)-N3(C)         | 99.6      |
|                |                  |              | N2(G)-O2(C)         | 99.4      | N2(G)-O2(C)         | 97.8      |
|                |                  | Wedge        | N4(C)-O6(G)         | 96.1      | N4(C)-O6(G)         | 97.4      |
|                |                  |              | N1(G)-N3(C)         | 94.3      | N1(G)-N3(C)         | 99.5      |
|                |                  |              | N2(G)-O2(C)         | 93.9      | N2(G)-O2(C)         | 99.4      |
|                |                  | Stacked      | N4(C)-O6(G)         | 96.9      | N4(C)-O6(G)         | 96.9      |
|                |                  |              | N1(G)-N3(C)         | 99.7      | N1(G)-N3(C)         | 98.9      |
|                |                  |              | N2(G)-O2(C)         | 99.3      | N2(G)-O2(C)         | 99.4      |
| G <sup>2</sup> | Neutral          | Major Groove | N4(C)-O6(G)         | 95.8      | N4(C)-O6(G)         | 94.8      |
|                |                  |              | N1(G)-N3(C)         | 98.6      | N1(G)-N3(C)         | 96.4      |
|                |                  |              | N2(G)-O2(C)         | 98.1      | N2(G)-O2(C)         | 98.8      |
|                |                  | Wedge        | N4(C)-O6(G)         | 95.5      | N4(C)-O6(G)         | 97.4      |
|                |                  |              | N1(G)-N3(C)         | 99.9      | N1(G)-N3(C)         | 99.5      |
|                |                  |              | N2(G)-O2(C)         | 99.2      | N2(G)-O2(C)         | 99.4      |
|                |                  | Stacked      | N4(C)-O6(G)         | 97.0      | N4(C)-O6(G)         | 97.8      |

|                |                  |              |             |      |             |      |
|----------------|------------------|--------------|-------------|------|-------------|------|
|                | COO <sup>-</sup> | Major Groove | N1(G)–N3(C) | 99.9 | N1(G)–N3(C) | 99.6 |
|                |                  |              | N2(G)–O2(C) | 99.5 | N2(G)–O2(C) | 99.6 |
|                |                  |              | N4(C)–O6(G) | 95.2 | N4(C)–O6(G) | 97.6 |
|                |                  | Wedge        | N1(G)–N3(C) | 99.7 | N1(G)–N3(C) | 99.5 |
|                |                  |              | N2(G)–O2(C) | 99.0 | N2(G)–O2(C) | 99.6 |
|                |                  |              | N4(C)–O6(G) | 96.6 | N4(C)–O6(G) | 97.7 |
|                |                  | Stacked      | N1(G)–N3(C) | 99.2 | N1(G)–N3(C) | 99.5 |
|                |                  |              | N2(G)–O2(C) | 98.4 | N2(G)–O2(C) | 99.5 |
|                |                  |              | N4(C)–O6(G) | 95.4 | N4(C)–O6(G) | 97.9 |
|                | ArO <sup>-</sup> | Major Groove | N1(G)–N3(C) | 99.8 | N1(G)–N3(C) | 99.8 |
|                |                  |              | N2(G)–O2(C) | 99.3 | N2(G)–O2(C) | 99.7 |
|                |                  |              | N4(C)–O6(G) | 95.2 | N4(C)–O6(G) | 97.6 |
|                |                  | Wedge        | N1(G)–N3(C) | 99.7 | N1(G)–N3(C) | 99.5 |
|                |                  |              | N2(G)–O2(C) | 99.0 | N2(G)–O2(C) | 99.6 |
|                |                  |              | N4(C)–O6(G) | 96.3 | N4(C)–O6(G) | 98.0 |
| G <sup>3</sup> | Dianionic        | Major Groove | N1(G)–N3(C) | 99.6 | N1(G)–N3(C) | 99.5 |
|                |                  |              | N2(G)–O2(C) | 99.5 | N2(G)–O2(C) | 99.5 |
|                |                  |              | N4(C)–O6(G) | 96.4 | N4(C)–O6(G) | 97.3 |
|                |                  | Wedge        | N1(G)–N3(C) | 99.9 | N1(G)–N3(C) | 99.5 |
|                |                  |              | N2(G)–O2(C) | 99.3 | N2(G)–O2(C) | 99.4 |
|                |                  |              | N4(C)–O6(G) | 96.1 | N4(C)–O6(G) | 97.3 |
|                |                  | Stacked      | N1(G)–N3(C) | 99.5 | N1(G)–N3(C) | 99.5 |
|                |                  |              | N2(G)–O2(C) | 99.3 | N2(G)–O2(C) | 99.4 |
|                |                  |              | N4(C)–O6(G) | 96.0 | N4(C)–O6(G) | 97.5 |
|                | Neutral          | Major Groove | N1(G)–N3(C) | 99.9 | N1(G)–N3(C) | 99.5 |
|                |                  |              | N2(G)–O2(C) | 99.3 | N2(G)–O2(C) | 99.6 |
|                |                  |              | N4(C)–O6(G) | 96.1 | N4(C)–O6(G) | 97.4 |
|                |                  | Wedge        | N1(G)–N3(C) | 99.7 | N1(G)–N3(C) | 99.7 |
|                |                  |              | N2(G)–O2(C) | 99.6 | N2(G)–O2(C) | 99.7 |
|                |                  |              | N4(C)–O6(G) | 96.3 | N4(C)–O6(G) | 98.0 |
|                |                  | Stacked      | N1(G)–N3(C) | 99.8 | N1(G)–N3(C) | 99.3 |
|                |                  |              | N2(G)–O2(C) | 99.3 | N2(G)–O2(C) | 99.6 |
|                |                  |              | N4(C)–O6(G) | 95.6 | N4(C)–O6(G) | 97.3 |
|                | COO <sup>-</sup> | Major Groove | N1(G)–N3(C) | 99.9 | N1(G)–N3(C) | 99.6 |
|                |                  |              | N2(G)–O2(C) | 99.3 | N2(G)–O2(C) | 99.7 |
|                |                  |              | N4(C)–O6(G) | 96.0 | N4(C)–O6(G) | 97.4 |
|                |                  | Wedge        | N1(G)–N3(C) | 99.9 | N1(G)–N3(C) | 99.8 |
|                |                  |              | N2(G)–O2(C) | 99.3 | N2(G)–O2(C) | 99.6 |
|                |                  |              | N4(C)–O6(G) | 95.1 | N4(C)–O6(G) | 98.0 |
|                |                  | Stacked      | N1(G)–N3(C) | 99.8 | N1(G)–N3(C) | 99.8 |
|                |                  |              | N2(G)–O2(C) | 99.4 | N2(G)–O2(C) | 99.7 |
|                |                  |              | N4(C)–O6(G) | 95.2 | N4(C)–O6(G) | 97.8 |
|                | ArO <sup>-</sup> | Major Groove | N1(G)–N3(C) | 99.5 | N1(G)–N3(C) | 98.2 |
|                |                  |              | N2(G)–O2(C) | 99.5 | N2(G)–O2(C) | 99.6 |
|                |                  |              | N4(C)–O6(G) | 96.6 | N4(C)–O6(G) | 95.9 |
|                |                  | Wedge        | N4(C)–O6(G) | 96.4 | N4(C)–O6(G) | 97.3 |

|  |           |              |             |      |             |      |
|--|-----------|--------------|-------------|------|-------------|------|
|  |           | Stacked      | N1(G)–N3(C) | 99.8 | N1(G)–N3(C) | 99.4 |
|  |           |              | N2(G)–O2(C) | 99.5 | N2(G)–O2(C) | 99.2 |
|  |           |              | N4(C)–O6(G) | 70.3 | N4(C)–O6(G) | 85.2 |
|  |           |              | N1(G)–N3(C) | 78.5 | N1(G)–N3(C) | 87.2 |
|  |           |              | N2(G)–O2(C) | 81.0 | N2(G)–O2(C) | 93.4 |
|  | Dianionic | Major Groove | N4(C)–O6(G) | 96.2 | N4(C)–O6(G) | 96.2 |
|  |           |              | N1(G)–N3(C) | 99.9 | N1(G)–N3(C) | 98.7 |
|  |           |              | N2(G)–O2(C) | 99.5 | N2(G)–O2(C) | 99.4 |
|  |           | Wedge        | N4(C)–O6(G) | 96.4 | N4(C)–O6(G) | 92.7 |
|  |           |              | N1(G)–N3(C) | 99.6 | N1(G)–N3(C) | 95.3 |
|  |           |              | N2(G)–O2(C) | 99.1 | N2(G)–O2(C) | 98.5 |
|  |           |              |             |      |             |      |

<sup>a</sup>Hydrogen-bonding interactions were determined using a cut-off of 3.4 Å for the donor–acceptor distance and 120° for the donor–hydrogen–acceptor angle. <sup>b</sup>5'– and 3'–G:C refer to the base pair at the 5' and 3' terminal ends with respect to the damaged nucleotide, respectively.

**Table S19.** Partial charges of the neutral OT-G adduct generated using the RED program.

|      |    |   |   |        |    |    |         |
|------|----|---|---|--------|----|----|---------|
| P    | P  | 0 | 1 | 131072 | 1  | 15 | 1.1706  |
| O    | OS | 0 | 1 | 131072 | 2  | 8  | -0.4973 |
| O1   | O2 | 0 | 1 | 131072 | 3  | 8  | -0.7693 |
| O2   | O2 | 0 | 1 | 131072 | 4  | 8  | -0.7693 |
| O3   | OS | 0 | 1 | 131072 | 5  | 8  | -0.544  |
| C5*  | Cl | 0 | 1 | 131072 | 6  | 6  | -0.0335 |
| H5*1 | H1 | 0 | 1 | 131072 | 7  | 1  | 0.0862  |
| H5*2 | H1 | 0 | 1 | 131072 | 8  | 1  | 0.0862  |
| C4*  | CT | 0 | 1 | 131072 | 9  | 6  | 0.1607  |
| H4*  | H1 | 0 | 1 | 131072 | 10 | 1  | 0.0844  |
| O4*  | OS | 0 | 1 | 131072 | 11 | 8  | -0.3953 |
| C1*  | CT | 0 | 1 | 131072 | 12 | 6  | 0.1501  |
| H1*  | H2 | 0 | 1 | 131072 | 13 | 1  | 0.035   |
| C3*  | CT | 0 | 1 | 131072 | 14 | 6  | 0.173   |
| H3*  | H1 | 0 | 1 | 131072 | 15 | 1  | 0.0625  |
| C2*  | CT | 0 | 1 | 131072 | 16 | 6  | -0.0039 |
| H2*1 | HC | 0 | 1 | 131072 | 17 | 1  | 0.0336  |
| H2*2 | HC | 0 | 1 | 131072 | 18 | 1  | 0.0336  |
| CG   | CA | 0 | 1 | 131072 | 19 | 6  | 0.0072  |
| CD1  | CA | 0 | 1 | 131072 | 20 | 6  | -0.0855 |
| HD1  | HA | 0 | 1 | 131072 | 21 | 1  | 0.1389  |
| CE1  | CA | 0 | 1 | 131072 | 22 | 6  | -0.1933 |
| HE1  | HA | 0 | 1 | 131072 | 23 | 1  | 0.1489  |
| CZ   | CA | 0 | 1 | 131072 | 24 | 6  | -0.1123 |
| HZ   | HA | 0 | 1 | 131072 | 25 | 1  | 0.1356  |
| CE2  | CA | 0 | 1 | 131072 | 26 | 6  | -0.1748 |
| HE2  | HA | 0 | 1 | 131072 | 27 | 1  | 0.1477  |
| CD2  | CA | 0 | 1 | 131072 | 28 | 6  | -0.1147 |
| HD2  | HA | 0 | 1 | 131072 | 29 | 1  | 0.1101  |
| CB   | CT | 0 | 1 | 131072 | 30 | 6  | -0.101  |
| HB1  | HC | 0 | 1 | 131072 | 31 | 1  | 0.0629  |
| HB2  | HC | 0 | 1 | 131072 | 32 | 1  | 0.0629  |
| CA   | CT | 0 | 1 | 131072 | 33 | 6  | -0.0087 |
| HA   | H1 | 0 | 1 | 131072 | 34 | 1  | 0.0906  |
| N    | N  | 0 | 1 | 131072 | 35 | 7  | -0.2329 |
| H    | H  | 0 | 1 | 131072 | 36 | 1  | 0.2161  |
| C    | C  | 0 | 1 | 131072 | 37 | 6  | 0.6594  |
| O5   | O  | 0 | 1 | 131072 | 38 | 8  | -0.5178 |
| OXT  | OH | 0 | 1 | 131072 | 39 | 8  | -0.6158 |
| HXT  | HO | 0 | 1 | 131072 | 40 | 1  | 0.4385  |
| C6   | C  | 0 | 1 | 131072 | 41 | 6  | 0.4301  |
| O6   | O  | 0 | 1 | 131072 | 42 | 8  | -0.5901 |

|     |    |   |   |        |    |   |         |
|-----|----|---|---|--------|----|---|---------|
| C7  | CA | 0 | 1 | 131072 | 43 | 6 | -0.0215 |
| C8  | CA | 0 | 1 | 131072 | 44 | 6 | 0.0799  |
| C9  | CA | 0 | 1 | 131072 | 45 | 6 | -0.0174 |
| H6  | HA | 0 | 1 | 131072 | 46 | 1 | 0.1589  |
| C10 | CA | 0 | 1 | 131072 | 47 | 6 | -0.0876 |
| C11 | CA | 0 | 1 | 131072 | 48 | 6 | -0.0181 |
| C12 | CA | 0 | 1 | 131072 | 49 | 6 | -0.085  |
| C13 | CT | 0 | 1 | 131072 | 50 | 6 | -0.0203 |
| H7  | HC | 0 | 1 | 131072 | 51 | 1 | 0.0665  |
| H8  | HC | 0 | 1 | 131072 | 52 | 1 | 0.0665  |
| C14 | CT | 0 | 1 | 131072 | 53 | 6 | 0.3187  |
| H9  | H1 | 0 | 1 | 131072 | 54 | 1 | 0.0234  |
| O7  | OH | 0 | 1 | 131072 | 55 | 8 | -0.4558 |
| H10 | HO | 0 | 1 | 131072 | 56 | 1 | 0.4378  |
| C15 | C  | 0 | 1 | 131072 | 57 | 6 | 0.7249  |
| O8  | O  | 0 | 1 | 131072 | 58 | 8 | -0.5964 |
| O9  | OS | 0 | 1 | 131072 | 59 | 8 | -0.4341 |
| C16 | CK | 0 | 1 | 131072 | 60 | 6 | 0.1759  |
| N1  | N* | 0 | 1 | 131072 | 61 | 7 | 0.0358  |
| N2  | NB | 0 | 1 | 131072 | 62 | 7 | -0.444  |
| C17 | CB | 0 | 1 | 131072 | 63 | 6 | 0.1588  |
| C18 | CB | 0 | 1 | 131072 | 64 | 6 | 0.0765  |
| N3  | NC | 0 | 1 | 131072 | 65 | 7 | -0.4179 |
| C19 | C  | 0 | 1 | 131072 | 66 | 6 | 0.4743  |
| C20 | CA | 0 | 1 | 131072 | 67 | 6 | 0.5064  |
| O10 | O  | 0 | 1 | 131072 | 68 | 8 | -0.538  |
| N4  | NA | 0 | 1 | 131072 | 69 | 7 | -0.4021 |
| H11 | H  | 0 | 1 | 131072 | 70 | 1 | 0.3382  |
| N5  | N2 | 0 | 1 | 131072 | 71 | 7 | -0.8147 |
| H12 | H  | 0 | 1 | 131072 | 72 | 1 | 0.38    |
| H13 | H  | 0 | 1 | 131072 | 73 | 1 | 0.38    |
| C21 | CT | 0 | 1 | 131072 | 74 | 6 | -0.2576 |
| H14 | HC | 0 | 1 | 131072 | 75 | 1 | 0.0811  |
| H15 | HC | 0 | 1 | 131072 | 76 | 1 | 0.0811  |
| H16 | HC | 0 | 1 | 131072 | 77 | 1 | 0.0811  |

**Table S20.** Partial charges of the monoanionic (carboxylic group ionized) OT-G adduct generated using the RED program.

|      |    |   |   |        |    |    |         |
|------|----|---|---|--------|----|----|---------|
| P    | P  | 0 | 1 | 131072 | 1  | 15 | 1.1658  |
| O    | OS | 0 | 1 | 131072 | 2  | 8  | -0.5093 |
| O1   | O2 | 0 | 1 | 131072 | 3  | 8  | -0.7674 |
| O2   | O2 | 0 | 1 | 131072 | 4  | 8  | -0.7674 |
| O3   | OS | 0 | 1 | 131072 | 5  | 8  | -0.5408 |
| C5*  | Cl | 0 | 1 | 131072 | 6  | 6  | 0.0116  |
| H5*1 | H1 | 0 | 1 | 131072 | 7  | 1  | 0.073   |
| H5*2 | H1 | 0 | 1 | 131072 | 8  | 1  | 0.073   |
| C4*  | CT | 0 | 1 | 131072 | 9  | 6  | 0.1496  |
| H4*  | H1 | 0 | 1 | 131072 | 10 | 1  | 0.1153  |
| O4*  | OS | 0 | 1 | 131072 | 11 | 8  | -0.4216 |
| C1*  | CT | 0 | 1 | 131072 | 12 | 6  | -0.0633 |
| H1*  | H2 | 0 | 1 | 131072 | 13 | 1  | 0.2083  |
| C3*  | CT | 0 | 1 | 131072 | 14 | 6  | 0.1291  |
| H3*  | H1 | 0 | 1 | 131072 | 15 | 1  | 0.0747  |
| C2*  | CT | 0 | 1 | 131072 | 16 | 6  | -0.0717 |
| H2*1 | HC | 0 | 1 | 131072 | 17 | 1  | 0.0491  |
| H2*2 | HC | 0 | 1 | 131072 | 18 | 1  | 0.0491  |
| CG   | CA | 0 | 1 | 131072 | 19 | 6  | 0.0155  |
| CD1  | CA | 0 | 1 | 131072 | 20 | 6  | -0.0912 |
| HD1  | HA | 0 | 1 | 131072 | 21 | 1  | 0.1453  |
| CE1  | CA | 0 | 1 | 131072 | 22 | 6  | -0.1824 |
| HE1  | HA | 0 | 1 | 131072 | 23 | 1  | 0.1271  |
| CZ   | CA | 0 | 1 | 131072 | 24 | 6  | -0.1216 |
| HZ   | HA | 0 | 1 | 131072 | 25 | 1  | 0.1167  |
| CE2  | CA | 0 | 1 | 131072 | 26 | 6  | -0.1793 |
| HE2  | HA | 0 | 1 | 131072 | 27 | 1  | 0.1342  |
| CD2  | CA | 0 | 1 | 131072 | 28 | 6  | -0.186  |
| HD2  | HA | 0 | 1 | 131072 | 29 | 1  | 0.1598  |
| CB   | CT | 0 | 1 | 131072 | 30 | 6  | -0.0585 |
| HB1  | HC | 0 | 1 | 131072 | 31 | 1  | 0.0425  |
| HB2  | HC | 0 | 1 | 131072 | 32 | 1  | 0.0425  |
| CA   | CT | 0 | 1 | 131072 | 33 | 6  | 0.0324  |
| HA   | H1 | 0 | 1 | 131072 | 34 | 1  | 0.0614  |
| N    | N  | 0 | 1 | 131072 | 35 | 7  | -0.2321 |
| H    | H  | 0 | 1 | 131072 | 36 | 1  | 0.1873  |
| C    | C  | 0 | 1 | 131072 | 37 | 6  | 0.68    |
| O5   | O2 | 0 | 1 | 131072 | 38 | 8  | -0.6897 |
| OXT  | O2 | 0 | 1 | 131072 | 39 | 8  | -0.6865 |
| C6   | C  | 0 | 1 | 131072 | 40 | 6  | 0.4082  |



|     |    |   |   |        |    |   |         |
|-----|----|---|---|--------|----|---|---------|
| O6  | O  | 0 | 1 | 131072 | 41 | 8 | -0.5622 |
| C7  | CA | 0 | 1 | 131072 | 42 | 6 | -0.0299 |
| C8  | CA | 0 | 1 | 131072 | 43 | 6 | 0.2541  |
| C9  | CA | 0 | 1 | 131072 | 44 | 6 | -0.2864 |
| H6  | HA | 0 | 1 | 131072 | 45 | 1 | 0.227   |
| C10 | CA | 0 | 1 | 131072 | 46 | 6 | -0.1049 |
| C11 | CA | 0 | 1 | 131072 | 47 | 6 | -0.0382 |
| C12 | CA | 0 | 1 | 131072 | 48 | 6 | -0.0806 |
| C13 | CT | 0 | 1 | 131072 | 49 | 6 | -0.0313 |
| H7  | HC | 0 | 1 | 131072 | 50 | 1 | 0.0659  |
| H8  | HC | 0 | 1 | 131072 | 51 | 1 | 0.0659  |
| C14 | CT | 0 | 1 | 131072 | 52 | 6 | 0.3359  |
| H9  | H1 | 0 | 1 | 131072 | 53 | 1 | 0.0019  |
| O7  | OH | 0 | 1 | 131072 | 54 | 8 | -0.5191 |
| H10 | HO | 0 | 1 | 131072 | 55 | 1 | 0.4278  |
| C15 | C  | 0 | 1 | 131072 | 56 | 6 | 0.7597  |
| O8  | O  | 0 | 1 | 131072 | 57 | 8 | -0.5604 |
| O9  | OS | 0 | 1 | 131072 | 58 | 8 | -0.4985 |
| C16 | CK | 0 | 1 | 131072 | 59 | 6 | 0.3168  |
| N1  | N* | 0 | 1 | 131072 | 60 | 7 | 0.0364  |
| N2  | NB | 0 | 1 | 131072 | 61 | 7 | -0.5346 |
| C17 | CB | 0 | 1 | 131072 | 62 | 6 | 0.1063  |
| C18 | CB | 0 | 1 | 131072 | 63 | 6 | 0.1361  |
| N3  | NC | 0 | 1 | 131072 | 64 | 7 | -0.375  |
| C19 | C  | 0 | 1 | 131072 | 65 | 6 | 0.4291  |
| C20 | CA | 0 | 1 | 131072 | 66 | 6 | 0.4623  |
| O10 | O  | 0 | 1 | 131072 | 67 | 8 | -0.5465 |
| N4  | NA | 0 | 1 | 131072 | 68 | 7 | -0.3501 |
| H11 | H  | 0 | 1 | 131072 | 69 | 1 | 0.3233  |
| N5  | N2 | 0 | 1 | 131072 | 70 | 7 | -0.8095 |
| H12 | H  | 0 | 1 | 131072 | 71 | 1 | 0.3664  |
| H13 | H  | 0 | 1 | 131072 | 72 | 1 | 0.3664  |
| C21 | CT | 0 | 1 | 131072 | 73 | 6 | -0.2181 |
| H14 | HC | 0 | 1 | 131072 | 74 | 1 | 0.0605  |
| H15 | HC | 0 | 1 | 131072 | 75 | 1 | 0.0605  |
| H16 | HC | 0 | 1 | 131072 | 76 | 1 | 0.0605  |

**Table S21.** Partial charges of the dianionic (phenolic group ionized) OT-G adduct generated using the RED program.

|      |    |   |   |        |    |    |         |
|------|----|---|---|--------|----|----|---------|
| P    | P  | 0 | 1 | 131072 | 1  | 15 | 1.1662  |
| O    | OS | 0 | 1 | 131072 | 2  | 8  | -0.4929 |
| O1   | O2 | 0 | 1 | 131072 | 3  | 8  | -0.7684 |
| O2   | O2 | 0 | 1 | 131072 | 4  | 8  | -0.7684 |
| O3   | OS | 0 | 1 | 131072 | 5  | 8  | -0.5366 |
| C5*  | CI | 0 | 1 | 131072 | 6  | 6  | -0.0143 |
| H5*1 | H1 | 0 | 1 | 131072 | 7  | 1  | 0.081   |
| H5*2 | H1 | 0 | 1 | 131072 | 8  | 1  | 0.081   |
| C4*  | CT | 0 | 1 | 131072 | 9  | 6  | 0.1285  |
| H4*  | H1 | 0 | 1 | 131072 | 10 | 1  | 0.096   |
| O4*  | OS | 0 | 1 | 131072 | 11 | 8  | -0.395  |
| C1*  | CT | 0 | 1 | 131072 | 12 | 6  | -0.0531 |
| H1*  | H2 | 0 | 1 | 131072 | 13 | 1  | 0.0814  |
| C3*  | CT | 0 | 1 | 131072 | 14 | 6  | 0.1593  |
| H3*  | H1 | 0 | 1 | 131072 | 15 | 1  | 0.0689  |
| C2*  | CT | 0 | 1 | 131072 | 16 | 6  | -0.02   |
| H2*1 | HC | 0 | 1 | 131072 | 17 | 1  | 0.0386  |
| H2*2 | HC | 0 | 1 | 131072 | 18 | 1  | 0.0386  |
| CG   | CA | 0 | 1 | 131072 | 19 | 6  | -0.0086 |
| CD1  | CA | 0 | 1 | 131072 | 20 | 6  | -0.0927 |
| HD1  | HA | 0 | 1 | 131072 | 21 | 1  | 0.135   |
| CE1  | CA | 0 | 1 | 131072 | 22 | 6  | -0.2113 |
| HE1  | HA | 0 | 1 | 131072 | 23 | 1  | 0.1304  |
| CZ   | CA | 0 | 1 | 131072 | 24 | 6  | -0.1021 |
| HZ   | HA | 0 | 1 | 131072 | 25 | 1  | 0.1141  |
| CE2  | CA | 0 | 1 | 131072 | 26 | 6  | -0.1953 |
| HE2  | HA | 0 | 1 | 131072 | 27 | 1  | 0.155   |
| CD2  | CA | 0 | 1 | 131072 | 28 | 6  | -0.1014 |
| HD2  | HA | 0 | 1 | 131072 | 29 | 1  | 0.1327  |
| CB   | CT | 0 | 1 | 131072 | 30 | 6  | -0.0626 |
| HB1  | HC | 0 | 1 | 131072 | 31 | 1  | 0.0348  |
| HB2  | HC | 0 | 1 | 131072 | 32 | 1  | 0.0348  |
| CA   | CT | 0 | 1 | 131072 | 33 | 6  | 0.0879  |
| HA   | H1 | 0 | 1 | 131072 | 34 | 1  | 0.0448  |
| N    | N  | 0 | 1 | 131072 | 35 | 7  | -0.3014 |
| H    | H  | 0 | 1 | 131072 | 36 | 1  | 0.2226  |
| C    | C  | 0 | 1 | 131072 | 37 | 6  | 0.6695  |
| OXT  | O  | 0 | 1 | 131072 | 38 | 8  | -0.5598 |
| O5   | OH | 0 | 1 | 131072 | 39 | 8  | -0.6407 |
| H6   | HO | 0 | 1 | 131072 | 40 | 1  | 0.4443  |
| C6   | C  | 0 | 1 | 131072 | 41 | 6  | 0.4661  |

|     |    |   |   |        |    |   |         |
|-----|----|---|---|--------|----|---|---------|
| O6  | O  | 0 | 1 | 131072 | 42 | 8 | -0.6567 |
| C7  | CA | 0 | 1 | 131072 | 43 | 6 | -0.1179 |
| C8  | C  | 0 | 1 | 131072 | 44 | 6 | 0.2048  |
| C9  | CA | 0 | 1 | 131072 | 45 | 6 | -0.0865 |
| H7  | HA | 0 | 1 | 131072 | 46 | 1 | 0.1914  |
| C10 | CA | 0 | 1 | 131072 | 47 | 6 | -0.1234 |
| C11 | CA | 0 | 1 | 131072 | 48 | 6 | -0.0158 |
| C12 | CA | 0 | 1 | 131072 | 49 | 6 | -0.1037 |
| C13 | CT | 0 | 1 | 131072 | 50 | 6 | 0.001   |
| H8  | HC | 0 | 1 | 131072 | 51 | 1 | 0.0408  |
| H9  | HC | 0 | 1 | 131072 | 52 | 1 | 0.0408  |
| C14 | CT | 0 | 1 | 131072 | 53 | 6 | 0.3846  |
| H10 | H1 | 0 | 1 | 131072 | 54 | 1 | -0.0062 |
| O7  | O  | 0 | 1 | 131072 | 55 | 8 | -0.4954 |
| C15 | C  | 0 | 1 | 131072 | 56 | 6 | 0.7011  |
| O8  | O  | 0 | 1 | 131072 | 57 | 8 | -0.5637 |
| O9  | OS | 0 | 1 | 131072 | 58 | 8 | -0.5086 |
| C16 | CK | 0 | 1 | 131072 | 59 | 6 | 0.0569  |
| N1  | N* | 0 | 1 | 131072 | 60 | 7 | 0.3077  |
| N2  | NB | 0 | 1 | 131072 | 61 | 7 | -0.4552 |
| C17 | CB | 0 | 1 | 131072 | 62 | 6 | 0.0574  |
| C18 | CB | 0 | 1 | 131072 | 63 | 6 | 0.0802  |
| N3  | NC | 0 | 1 | 131072 | 64 | 7 | -0.4424 |
| C19 | C  | 0 | 1 | 131072 | 65 | 6 | 0.5276  |
| C20 | CA | 0 | 1 | 131072 | 66 | 6 | 0.579   |
| O10 | O  | 0 | 1 | 131072 | 67 | 8 | -0.5723 |
| N4  | NA | 0 | 1 | 131072 | 68 | 7 | -0.4711 |
| H11 | H  | 0 | 1 | 131072 | 69 | 1 | 0.3423  |
| N5  | N2 | 0 | 1 | 131072 | 70 | 7 | -0.844  |
| H12 | H  | 0 | 1 | 131072 | 71 | 1 | 0.3672  |
| H13 | H  | 0 | 1 | 131072 | 72 | 1 | 0.3672  |
| C21 | CT | 0 | 1 | 131072 | 73 | 6 | -0.2371 |
| H14 | HC | 0 | 1 | 131072 | 74 | 1 | 0.0544  |
| H15 | HC | 0 | 1 | 131072 | 75 | 1 | 0.0544  |
| H16 | HC | 0 | 1 | 131072 | 76 | 1 | 0.0544  |

**Table S22.** Partial charges of the dianionic (carboxylic and phenolic group ionized) OT-G adduct generated using the RED program.

|      |    |   |   |        |    |    |         |
|------|----|---|---|--------|----|----|---------|
| P    | P  | 0 | 1 | 131072 | 1  | 15 | 1.165   |
| O    | OS | 0 | 1 | 131072 | 2  | 8  | -0.5277 |
| O1   | O2 | 0 | 1 | 131072 | 3  | 8  | -0.7663 |
| O2   | O2 | 0 | 1 | 131072 | 4  | 8  | -0.7663 |
| O3   | OS | 0 | 1 | 131072 | 5  | 8  | -0.545  |
| C5*  | CI | 0 | 1 | 131072 | 6  | 6  | -0.0142 |
| H5*1 | H1 | 0 | 1 | 131072 | 7  | 1  | 0.0857  |
| H5*2 | H1 | 0 | 1 | 131072 | 8  | 1  | 0.0857  |
| C4*  | CT | 0 | 1 | 131072 | 9  | 6  | 0.1445  |
| H4*  | H1 | 0 | 1 | 131072 | 10 | 1  | 0.1083  |
| O4*  | OS | 0 | 1 | 131072 | 11 | 8  | -0.413  |
| C1*  | CT | 0 | 1 | 131072 | 12 | 6  | -0.0755 |
| H1*  | H2 | 0 | 1 | 131072 | 13 | 1  | 0.1369  |
| C3*  | CT | 0 | 1 | 131072 | 14 | 6  | 0.1425  |
| H3*  | H1 | 0 | 1 | 131072 | 15 | 1  | 0.0885  |
| C2*  | CT | 0 | 1 | 131072 | 16 | 6  | -0.0859 |
| H2*1 | HC | 0 | 1 | 131072 | 17 | 1  | 0.0548  |
| H2*2 | HC | 0 | 1 | 131072 | 18 | 1  | 0.0548  |
| CG   | CA | 0 | 1 | 131072 | 19 | 6  | -0.0311 |
| CD1  | CA | 0 | 1 | 131072 | 20 | 6  | -0.1002 |
| HD1  | HA | 0 | 1 | 131072 | 21 | 1  | 0.1134  |
| CE1  | CA | 0 | 1 | 131072 | 22 | 6  | -0.2011 |
| HE1  | HA | 0 | 1 | 131072 | 23 | 1  | 0.1168  |
| CZ   | CA | 0 | 1 | 131072 | 24 | 6  | -0.1414 |
| HZ   | HA | 0 | 1 | 131072 | 25 | 1  | 0.1071  |
| CE2  | CA | 0 | 1 | 131072 | 26 | 6  | -0.169  |
| HE2  | HA | 0 | 1 | 131072 | 27 | 1  | 0.1256  |
| CD2  | CA | 0 | 1 | 131072 | 28 | 6  | -0.1089 |
| HD2  | HA | 0 | 1 | 131072 | 29 | 1  | 0.146   |
| CB   | CT | 0 | 1 | 131072 | 30 | 6  | -0.1223 |
| HB1  | HC | 0 | 1 | 131072 | 31 | 1  | 0.0769  |
| HB2  | HC | 0 | 1 | 131072 | 32 | 1  | 0.0769  |
| CA   | CT | 0 | 1 | 131072 | 33 | 6  | 0.0837  |
| HA   | H1 | 0 | 1 | 131072 | 34 | 1  | 0.0269  |
| N    | N  | 0 | 1 | 131072 | 35 | 7  | -0.1664 |
| H    | H  | 0 | 1 | 131072 | 36 | 1  | 0.2006  |
| C    | C  | 0 | 1 | 131072 | 37 | 6  | 0.7687  |
| O5   | O2 | 0 | 1 | 131072 | 38 | 8  | -0.7572 |
| OXT  | O2 | 0 | 1 | 131072 | 39 | 8  | -0.7822 |
| C6   | C  | 0 | 1 | 131072 | 40 | 6  | 0.2756  |
| O6   | O  | 0 | 1 | 131072 | 41 | 8  | -0.5437 |

|     |    |   |   |        |    |   |         |
|-----|----|---|---|--------|----|---|---------|
| C7  | CA | 0 | 1 | 131072 | 42 | 6 | -0.0213 |
| C8  | C  | 0 | 1 | 131072 | 43 | 6 | 0.329   |
| C9  | CA | 0 | 1 | 131072 | 44 | 6 | -0.1793 |
| H6  | HA | 0 | 1 | 131072 | 45 | 1 | 0.1654  |
| C10 | CA | 0 | 1 | 131072 | 46 | 6 | -0.2033 |
| C11 | CA | 0 | 1 | 131072 | 47 | 6 | -0.0352 |
| C12 | CA | 0 | 1 | 131072 | 48 | 6 | -0.1103 |
| C13 | CT | 0 | 1 | 131072 | 49 | 6 | -0.0097 |
| H7  | HC | 0 | 1 | 131072 | 50 | 1 | 0.0437  |
| H8  | HC | 0 | 1 | 131072 | 51 | 1 | 0.0437  |
| C14 | CT | 0 | 1 | 131072 | 52 | 6 | 0.3777  |
| H9  | H1 | 0 | 1 | 131072 | 53 | 1 | 0.001   |
| O7  | O  | 0 | 1 | 131072 | 54 | 8 | -0.5876 |
| C15 | C  | 0 | 1 | 131072 | 55 | 6 | 0.731   |
| O8  | O  | 0 | 1 | 131072 | 56 | 8 | -0.5924 |
| O9  | OS | 0 | 1 | 131072 | 57 | 8 | -0.5076 |
| C16 | CK | 0 | 1 | 131072 | 58 | 6 | 0.2933  |
| N1  | N* | 0 | 1 | 131072 | 59 | 7 | 0.1072  |
| N2  | NB | 0 | 1 | 131072 | 60 | 7 | -0.5975 |
| C17 | CB | 0 | 1 | 131072 | 61 | 6 | 0.1587  |
| C18 | CB | 0 | 1 | 131072 | 62 | 6 | 0.1077  |
| N3  | NC | 0 | 1 | 131072 | 63 | 7 | -0.567  |
| C19 | C  | 0 | 1 | 131072 | 64 | 6 | 0.5549  |
| C20 | CA | 0 | 1 | 131072 | 65 | 6 | 0.715   |
| O10 | O  | 0 | 1 | 131072 | 66 | 8 | -0.5956 |
| N4  | NA | 0 | 1 | 131072 | 67 | 7 | -0.5721 |
| H10 | H  | 0 | 1 | 131072 | 68 | 1 | 0.3543  |
| N5  | N2 | 0 | 1 | 131072 | 69 | 7 | -0.9145 |
| H11 | H  | 0 | 1 | 131072 | 70 | 1 | 0.377   |
| H12 | H  | 0 | 1 | 131072 | 71 | 1 | 0.377   |
| C21 | CT | 0 | 1 | 131072 | 72 | 6 | -0.331  |
| H13 | HC | 0 | 1 | 131072 | 73 | 1 | 0.0734  |
| H14 | HC | 0 | 1 | 131072 | 74 | 1 | 0.0734  |
| H15 | HC | 0 | 1 | 131072 | 75 | 1 | 0.0734  |

**Table S23.** Average and standard deviation in the  $\chi$  and  $\theta$  dihedral angles (deg.) from the last 10 ns of the MD production simulations on duplexes containing COO<sup>-</sup> OT-G positioned at G<sup>3</sup> and mismatched against A performed using a 10 Å water box and a non-bonded cut-off of 9 Å.

| Conformer    | $\chi$      | $\theta$    |
|--------------|-------------|-------------|
| Major groove | 210.0 (8.2) | 18.1 (6.8)  |
| Wedge        | 77.4 (13.2) | 13.9 (6.6)  |
| Stacked      | 33.8 (7.8)  | 352.3 (6.5) |

**Table S24.** Hydrogen-bonding occupancies (%) for simulations on duplexes containing COO<sup>-</sup> OT-G positioned at G<sup>3</sup> and mismatched against A from the last 10 ns of the MD production simulation performed using a 10 Å water box and a non-bonded cut-off of 9 Å.

| Conformer    | Hydrogen bond (OT-G:A) | Occupancy (%) |
|--------------|------------------------|---------------|
| Major groove | N1(OT-G) – N7(A)       | 98.2          |
|              | O6(OT-G) – N6 (A)      | 94.6          |
| Wedge        | O6(OT-G) – C2 (A)      | 43.3          |

**Table S25.** Average and standard deviation in the  $\chi$  and  $\theta$  dihedral angles (deg.) and relative MM-PBSA free energies (kcal mol<sup>-1</sup>) from 500 ns MD simulations on duplexes containing COO<sup>-</sup> OT-G positioned at G<sup>2</sup> and mismatched against T.

| Conformer    | $\chi$       | $\theta$     | Relative MM-PBSA free energies |
|--------------|--------------|--------------|--------------------------------|
| Major groove | 204.8 (15.5) | 20.2 (6.9)   | 0.0                            |
| Wedge        | 76.9 (12.2)  | 16.5 (6.9)   | 3.0                            |
| Stacked      | 43.2 (20.3)  | 354.0 (11.7) | 22.3                           |

**Table S26.** Hydrogen-bonding occupancies (%) from 500 ns MD simulations on duplexes containing COO<sup>-</sup> OT-G positioned at G<sup>2</sup> and mismatched against T.

| Conformer    | Hydrogen bond (OT-G:T) | Occupancy (%) |
|--------------|------------------------|---------------|
| Major groove | N1(OT-G) – O2 (T)      | 86.1          |
|              | O6(OT-G) – N3 (T)      | 94.1          |
| Wedge        | O6(OT-G) – N3 (A)      | 66.8          |

## References:

- (1) Burnouf, D., Koehl, P., and Fuchs, R. (1989) Single adduct mutagenesis: strong effect of the position of a single acetylaminofluorene adduct within a mutation hot spot. *Proc. Natl. Acad. Sci.* **86**, 4147-4151.
- (2) Millen, A. L., Sharma, P., and Wetmore, S. D. (2012) C8-linked bulky guanosine DNA adducts: experimental and computational insights into adduct conformational preferences and resulting mutagenicity. *Future Med. Chem.* **4**, 1981-2007.
- (3) Sharma, P., Manderville, R. A., and Wetmore, S. D. (2013) Modeling the conformational preference of the carbon-bonded covalent adduct formed upon exposure of 2'-deoxyguanosine to ochratoxin A. *Chem. Res. Toxicol.* **26**, 803-816.
- (4) Sharma, P., Manderville, R. A., and Wetmore, S. D. (2014) Structural and energetic characterization of the major DNA adduct formed from the food mutagen ochratoxin A in the *NarI* hotspot sequence: influence of adduct ionization on the conformational preferences and implications for the NER propensity. *Nucleic Acids Res.* **42**, 11831-11845.
- (5) Jorgensen, W. L., Chandrasekhar, J., Madura, J. D., Impey, R. W., and Klein, M. L. (1983) Comparison of simple potential functions for simulating liquid water. *J. Chem. Phys.* **79**, 926-935.
- (6) Case, D. A., Darden, T. A., Cheatham, T. E., Simmerling, C. L., Wang, J., Duke, R. E., Luo, R., Walker, R. C., Zhang, W., Merz, K. M., Roberts, B., Hayik, S., Roitberg, A., Seabra, G., Swails, J., Goetz, A. W., Kolossváry, I., Wong, K. F., Paesani, F., Vanicek, J., Wolf, R. M., Liu, J., Wu, X., Brozell, S. R., Steinbrecher, T., Gohlke, H., Cai, Q., Ye, X., Wang, J., Hsieh, M. J., Cui, G., Roe, D. R., Mathews, D. H., Seetin, M. G., Salomon-Ferrer, R., Sagui, C., Babin, V., Luchko, T., Gusarov, S., Kovalenko, A., and Kollman, P. A. (2012) AMBER 12, University of California, San Francisco.
- (7) Pérez, A., Marchán, I., Svozil, D., Sponer, J., Cheatham, T. E., Laughton, C. A., and Orozco, M. (2007) Refinement of the AMBER force field for nucleic acids: improving the description of  $\alpha/\gamma$  conformers. *Biophys. J.* **92**, 3817-3829.
- (8) Cheatham III, T. E., Cieplak, P., and Kollman, P. A. (1999) A modified version of the Cornell et al. force field with improved sugar pucker phases and helical repeat. *J. Biomol. Struct. Dyn.* **16**, 845-862.
- (9) Kropachev, K., Ding, S., Terzidis, M. A., Masi, A., Liu, Z., Cai, Y., Kolbanovskiy, M., Chatgililoglu, C., Broyde, S., and Geacintov, N. E. (2014) Structural basis for the recognition of diastereomeric 5', 8-cyclo-2'-deoxypurine lesions by the human nucleotide excision repair system. *Nucleic Acids Res.* **42**, 5020-5032.
- (10) Ding, S., Kropachev, K., Cai, Y., Kolbanovskiy, M., Durandina, S. A., Liu, Z., Shafirovich, V., Broyde, S., and Geacintov, N. E. (2011) Structural, energetic and dynamic properties of guanine (C8)-thymine (N3) cross-links in DNA provide insights on susceptibility to nucleotide excision repair. *Nucleic Acids Res.* **40**, 2506-2517.
- (11) Kathuria, P., Sharma, P., Manderville, R. A., and Wetmore, S. D. (2017) Molecular modeling of the major DNA adduct formed from the food mutagen ochratoxin A in *NarI* 2-base deletion duplexes: Impact of sequence context and adduct ionization on conformational preference and mutagenicity. *Chem. Res. Toxicol.* **30**, 1582-1591.
- (12) Miller III, B. R., McGee Jr, T. D., Swails, J. M., Homeyer, N., Gohlke, H., and Roitberg, A. E. (2012) MMPBSA.py: an efficient program for end-state free energy calculations. *J. Chem. Theory Comput.* **8**, 3314-3321.
- (13) Witham, A. A., Verwey, A. M., Sproviero, M., Manderville, R. A., Sharma, P., and Wetmore, S. D. (2015) Chlorine functionalization of a model phenolic C8-guanine adduct increases conformational rigidity and blocks extension by a Y-family DNA polymerase. *Chem. Res. Toxicol.* **28**, 1346-1356.
